# Supplementary material for: Multitarget Approach to Drug Candidates against Alzheimer’s Disease Related to AChE, SERT, BACE1 and GSK3β Protein Targets
Source: PubMed Central journal article supplement (PMC7221701; doi:10.3390/molecules25081846), 2020-04-17
Supplement: molecules-25-01846-s001.pdf [file molecules-25-01846-s001.pdf]

## Supplementary Material

Table S0. Experimental and predicted log(IC50) for BMLR and ANN QSAR models

| BMLR Models    |                    |                     |                |                    |                     |                |                    |                     |                |                    |                     |
|----------------|--------------------|---------------------|----------------|--------------------|---------------------|----------------|--------------------|---------------------|----------------|--------------------|---------------------|
| BACE1          |                    |                     | AChE           |                    |                     | GSK3b          |                    |                     | SERT           |                    |                     |
| ChemBL ID      | Exp log(IC50) [nM] | Pred log(IC50) [nM] | ChemBL ID      | Exp log(IC50) [nM] | Pred log(IC50) [nM] | ChemBL ID      | Exp log(IC50) [nM] | Pred log(IC50) [nM] | ChemBL ID      | Exp log(IC50) [nM] | Pred log(IC50) [nM] |
| CHEMBL 3695730 | -0.301             | -0.142              | CHEMBL 3585777 | -1.571             | -1.635              | CHEMBL 362558  | -0.046             | 0.136               | CHEMBL 3673148 | 0.176              | 0.131               |
| CHEMBL 3695751 | -0.222             | 0.156               | CHEMBL 3585778 | -1.571             | -1.533              | CHEMBL 3410089 | 0.041              | 0.502               | CHEMBL 3673174 | 0.322              | 0.501               |
| CHEMBL 3695752 | -0.155             | 0.124               | CHEMBL 3585779 | -1.571             | -1.637              | CHEMBL 2048685 | 0.301              | 0.755               | CHEMBL 3673176 | 0.342              | 0.625               |
| CHEMBL 3695744 | 0.146              | 0.357               | CHEMBL 3585775 | -1.571             | -1.553              | CHEMBL 3647955 | 0.477              | 0.472               | CHEMBL 3673177 | 0.380              | 0.241               |
| CHEMBL 3695747 | 0.146              | 0.212               | CHEMBL 3585776 | -1.571             | -1.533              | CHEMBL 2048659 | 0.602              | 0.883               | CHEMBL 3673141 | 0.415              | 0.512               |
| CHEMBL 3695753 | 0.301              | 0.100               | CHEMBL 3585782 | -1.571             | -1.592              | CHEMBL 3647956 | 0.699              | 0.574               | CHEMBL 2333627 | 0.519              | 0.896               |
| CHEMBL 3639946 | 0.380              | 0.222               | CHEMBL 3585783 | -1.571             | -1.578              | CHEMBL 2386106 | 0.724              | 0.930               | CHEMBL 3673152 | 0.531              | 0.824               |
| CHEMBL 3953199 | 0.415              | 0.768               | CHEMBL 3585784 | -1.571             | -1.574              | CHEMBL 2386112 | 0.724              | 0.718               | CHEMBL 3673161 | 0.580              | 0.580               |
| CHEMBL 3695749 | 0.447              | 0.364               | CHEMBL 3585780 | -1.571             | -1.435              | CHEMBL 3410110 | 0.771              | 0.582               | CHEMBL 2338046 | 0.600              | 0.780               |
| CHEMBL 3985433 | 0.699              | 0.355               | CHEMBL 3585781 | -1.571             | -1.492              | CHEMBL 2048683 | 0.845              | 1.164               | CHEMBL 2333626 | 0.602              | 0.776               |
| CHEMBL 3910332 | 0.699              | 0.804               | CHEMBL 3884988 | 1.639              | 1.477               | CHEMBL 2048665 | 0.903              | 0.912               | CHEMBL 3673157 | 0.623              | 0.719               |
| CHEMBL 3960603 | 0.699              | 1.148               | CHEMBL 603622  | 1.653              | 1.448               | CHEMBL 3647954 | 0.903              | 0.671               | CHEMBL 3673154 | 0.633              | 0.757               |
| CHEMBL 3906568 | 0.699              | 0.772               | CHEMBL 3827432 | 2.037              | 2.552               | CHEMBL 2048679 | 0.903              | 1.267               | CHEMBL 3673175 | 0.643              | 0.795               |
| CHEMBL 3394212 | 0.778              | 0.931               | CHEMBL 3416998 | 2.072              | 2.498               | CHEMBL 2048672 | 0.954              | 0.859               | CHEMBL 3323184 | 0.643              | 0.977               |

|                   |       |       |                   |       |       |                   |       |       |                   |       |       |
|-------------------|-------|-------|-------------------|-------|-------|-------------------|-------|-------|-------------------|-------|-------|
| CHEMBL<br>3971416 | 0.799 | 1.147 | CHEMBL<br>3786937 | 2.121 | 2.637 | CHEMBL<br>2048673 | 0.954 | 1.413 | CHEMBL<br>3323183 | 0.653 | 0.951 |
| CHEMBL<br>3394217 | 0.813 | 0.897 | CHEMBL<br>3410955 | 2.157 | 2.620 | CHEMBL<br>3735176 | 0.982 | 1.165 | CHEMBL<br>3673167 | 0.681 | 0.774 |
| CHEMBL<br>3394040 | 0.869 | 1.055 | CHEMBL<br>3632990 | 2.176 | 2.636 | CHEMBL<br>2048669 | 1.000 | 1.231 | CHEMBL<br>3703728 | 0.681 | 0.925 |
| CHEMBL<br>3673214 | 0.875 | 0.908 | CHEMBL<br>3754672 | 2.301 | 2.706 | CHEMBL<br>2386273 | 1.049 | 1.232 | CHEMBL<br>3703738 | 0.690 | 0.997 |
| CHEMBL<br>3980437 | 0.903 | 0.855 | CHEMBL<br>1677    | 2.312 | 2.489 | CHEMBL<br>2386089 | 1.061 | 1.010 | CHEMBL<br>3323182 | 0.690 | 0.949 |
| CHEMBL<br>3897568 | 0.903 | 0.823 | CHEMBL<br>3632988 | 2.322 | 2.665 | CHEMBL<br>2048671 | 1.079 | 1.051 | CHEMBL<br>2338053 | 0.700 | 0.882 |
| CHEMBL<br>3964240 | 0.903 | 1.062 | CHEMBL<br>3828696 | 2.330 | 2.664 | CHEMBL<br>3091536 | 1.079 | 1.143 | CHEMBL<br>2338050 | 0.700 | 0.909 |
| CHEMBL<br>3892262 | 0.954 | 0.525 | CHEMBL<br>3586207 | 2.342 | 2.808 | CHEMBL<br>2048661 | 1.079 | 1.205 | CHEMBL<br>3673146 | 0.716 | 0.563 |
| CHEMBL<br>3920257 | 0.954 | 0.715 | CHEMBL<br>3752384 | 2.346 | 2.710 | CHEMBL<br>3401116 | 1.079 | 1.498 | CHEMBL<br>3673143 | 0.724 | 0.568 |
| CHEMBL<br>3905872 | 0.954 | 1.023 | CHEMBL<br>3416999 | 2.346 | 2.531 | CHEMBL<br>1809110 | 1.100 | 1.217 | CHEMBL<br>3323174 | 0.724 | 1.050 |
| CHEMBL<br>3957841 | 0.954 | 0.714 | CHEMBL<br>3410956 | 2.355 | 2.613 | CHEMBL<br>3410087 | 1.114 | 0.708 | CHEMBL<br>3673136 | 0.748 | 0.737 |
| CHEMBL<br>3677269 | 0.954 | 1.031 | CHEMBL<br>3819083 | 2.369 | 2.531 | CHEMBL<br>3091537 | 1.114 | 1.516 | CHEMBL<br>2333608 | 0.748 | 0.910 |
| CHEMBL<br>3695738 | 0.968 | 0.445 | CHEMBL<br>3577522 | 2.398 | 2.816 | CHEMBL<br>3652540 | 1.114 | 1.505 | CHEMBL<br>3673164 | 0.771 | 1.008 |
| CHEMBL<br>3741314 | 0.978 | 1.512 | CHEMBL<br>3828054 | 2.407 | 2.766 | CHEMBL<br>2048666 | 1.146 | 1.596 | CHEMBL<br>3703736 | 0.785 | 1.154 |
| CHEMBL<br>3944362 | 0.987 | 0.420 | CHEMBL<br>3415573 | 2.412 | 2.628 | CHEMBL<br>2048658 | 1.146 | 1.511 | CHEMBL<br>2333648 | 0.799 | 1.195 |
| CHEMBL<br>3980315 | 1.000 | 0.902 | CHEMBL<br>3632987 | 2.415 | 2.650 | CHEMBL<br>3401120 | 1.146 | 1.454 | CHEMBL<br>2338051 | 0.800 | 0.872 |
| CHEMBL<br>3977154 | 1.013 | 1.363 | CHEMBL<br>3582232 | 2.425 | 2.836 | CHEMBL<br>2386097 | 1.176 | 1.473 | CHEMBL<br>3673169 | 0.806 | 0.624 |
| CHEMBL<br>3905497 | 1.029 | 1.172 | CHEMBL<br>3415568 | 2.428 | 2.781 | CHEMBL<br>3647950 | 1.204 | 1.221 | CHEMBL<br>3673150 | 0.806 | 0.621 |
| CHEMBL<br>3916731 | 1.041 | 0.887 | CHEMBL<br>3415643 | 2.431 | 2.527 | CHEMBL<br>3401125 | 1.204 | 1.487 | CHEMBL<br>3323102 | 0.806 | 1.167 |

|                   |       |       |                   |       |       |                   |       |       |                   |       |       |
|-------------------|-------|-------|-------------------|-------|-------|-------------------|-------|-------|-------------------|-------|-------|
| CHEMBL<br>3921481 | 1.041 | 0.997 | CHEMBL<br>3586577 | 2.477 | 2.505 | CHEMBL<br>2046466 | 1.230 | 1.009 | CHEMBL<br>2333625 | 0.806 | 0.524 |
| CHEMBL<br>3896933 | 1.041 | 1.028 | CHEMBL<br>3415560 | 2.481 | 2.922 | CHEMBL<br>2048664 | 1.230 | 1.470 | CHEMBL<br>2333624 | 0.820 | 1.064 |
| CHEMBL<br>3688816 | 1.064 | 1.229 | CHEMBL<br>3753706 | 2.489 | 2.592 | CHEMBL<br>3401115 | 1.230 | 1.499 | CHEMBL<br>2333647 | 0.820 | 1.255 |
| CHEMBL<br>3891061 | 1.079 | 0.700 | CHEMBL<br>3819231 | 2.507 | 2.545 | CHEMBL<br>2391102 | 1.230 | 1.435 | CHEMBL<br>2333610 | 0.833 | 1.057 |
| CHEMBL<br>3683816 | 1.111 | 1.562 | CHEMBL<br>3417000 | 2.507 | 2.544 | CHEMBL<br>2386108 | 1.246 | 1.306 | CHEMBL<br>2333604 | 0.833 | 1.071 |
| CHEMBL<br>3673211 | 1.146 | 1.448 | CHEMBL<br>3754480 | 2.509 | 2.572 | CHEMBL<br>3401119 | 1.279 | 1.393 | CHEMBL<br>3703735 | 0.839 | 1.197 |
| CHEMBL<br>3896538 | 1.146 | 1.136 | CHEMBL<br>3415565 | 2.517 | 2.770 | CHEMBL<br>2391101 | 1.279 | 1.475 | CHEMBL<br>3323109 | 0.839 | 1.154 |
| CHEMBL<br>3683804 | 1.152 | 1.604 | CHEMBL<br>3582201 | 2.522 | 2.859 | CHEMBL<br>3401126 | 1.279 | 1.512 | CHEMBL<br>3673170 | 0.857 | 0.650 |
| CHEMBL<br>3394045 | 1.155 | 1.529 | CHEMBL<br>3819383 | 2.530 | 2.524 | CHEMBL<br>2386102 | 1.297 | 1.285 | CHEMBL<br>3673151 | 0.857 | 0.805 |
| CHEMBL<br>3688819 | 1.158 | 1.441 | CHEMBL<br>3415575 | 2.581 | 2.625 | CHEMBL<br>1809109 | 1.300 | 1.583 | CHEMBL<br>3673149 | 0.863 | 0.501 |
| CHEMBL<br>3912215 | 1.164 | 1.059 | CHEMBL<br>3597057 | 2.591 | 3.039 | CHEMBL<br>3652541 | 1.301 | 1.339 | CHEMBL<br>3673142 | 0.863 | 1.260 |
| CHEMBL<br>3973523 | 1.164 | 1.212 | CHEMBL<br>3827064 | 2.591 | 2.599 | CHEMBL<br>3652550 | 1.301 | 1.137 | CHEMBL<br>2333617 | 0.863 | 1.025 |
| CHEMBL<br>3913223 | 1.176 | 0.897 | CHEMBL<br>3818089 | 2.591 | 2.682 | CHEMBL<br>3647951 | 1.322 | 0.850 | CHEMBL<br>2333639 | 0.869 | 1.170 |
| CHEMBL<br>3688660 | 1.215 | 1.568 | CHEMBL<br>85251   | 2.605 | 2.529 | CHEMBL<br>3736035 | 1.322 | 1.378 | CHEMBL<br>3673138 | 0.892 | 0.797 |
| CHEMBL<br>3688820 | 1.230 | 1.341 | CHEMBL<br>3754146 | 2.619 | 2.510 | CHEMBL<br>489422  | 1.324 | 1.372 | CHEMBL<br>2338045 | 0.900 | 1.206 |
| CHEMBL<br>3394054 | 1.241 | 1.240 | CHEMBL<br>3752451 | 2.627 | 2.602 | CHEMBL<br>2386095 | 1.330 | 1.457 | CHEMBL<br>2338031 | 0.900 | 1.093 |
| CHEMBL<br>3688652 | 1.265 | 1.591 | CHEMBL<br>3577517 | 2.633 | 2.867 | CHEMBL<br>3410105 | 1.342 | 1.743 | CHEMBL<br>2337596 | 0.900 | 1.303 |
| CHEMBL<br>3673202 | 1.279 | 1.631 | CHEMBL<br>3415570 | 2.640 | 2.952 | CHEMBL<br>3091529 | 1.342 | 1.598 | CHEMBL<br>3673178 | 0.903 | 0.724 |
| CHEMBL<br>3683911 | 1.283 | 1.705 | CHEMBL<br>3586583 | 2.643 | 3.123 | CHEMBL<br>3401121 | 1.362 | 1.455 | CHEMBL<br>2333615 | 0.919 | 1.050 |

|                   |       |       |                   |       |       |                   |       |       |                   |       |       |
|-------------------|-------|-------|-------------------|-------|-------|-------------------|-------|-------|-------------------|-------|-------|
| CHEMBL<br>3683883 | 1.330 | 1.523 | CHEMBL<br>3582225 | 2.653 | 3.081 | CHEMBL<br>3940448 | 1.380 | 1.795 | CHEMBL<br>3323176 | 0.924 | 1.128 |
| CHEMBL<br>3688678 | 1.338 | 1.781 | CHEMBL<br>3410957 | 2.656 | 2.618 | CHEMBL<br>2386107 | 1.401 | 1.003 | CHEMBL<br>3673159 | 0.934 | 0.918 |
| CHEMBL<br>3427250 | 1.342 | 1.696 | CHEMBL<br>3905695 | 2.690 | 2.752 | CHEMBL<br>3091547 | 1.431 | 1.574 | CHEMBL<br>3673173 | 0.949 | 0.679 |
| CHEMBL<br>3683884 | 1.362 | 1.522 | CHEMBL<br>3582228 | 2.693 | 2.793 | CHEMBL<br>3410109 | 1.477 | 1.378 | CHEMBL<br>3681359 | 0.954 | 1.301 |
| CHEMBL<br>3394228 | 1.362 | 1.105 | CHEMBL<br>3582224 | 2.695 | 2.838 | CHEMBL<br>3647952 | 1.477 | 1.387 | CHEMBL<br>2333642 | 0.954 | 1.117 |
| CHEMBL<br>3943188 | 1.362 | 1.346 | CHEMBL<br>3415561 | 2.695 | 2.901 | CHEMBL<br>3652547 | 1.477 | 1.004 | CHEMBL<br>2333614 | 0.959 | 1.146 |
| CHEMBL<br>3947671 | 1.362 | 1.357 | CHEMBL<br>3577510 | 2.699 | 2.865 | CHEMBL<br>3661031 | 1.477 | 1.851 | CHEMBL<br>3673160 | 0.968 | 1.334 |
| CHEMBL<br>3683920 | 1.367 | 1.437 | CHEMBL<br>3582206 | 2.705 | 2.808 | CHEMBL<br>3401122 | 1.477 | 1.514 | CHEMBL<br>3673129 | 0.973 | 0.750 |
| CHEMBL<br>3937729 | 1.380 | 1.282 | CHEMBL<br>3597068 | 2.708 | 2.749 | CHEMBL<br>3735967 | 1.491 | 1.580 | CHEMBL<br>3673162 | 0.991 | 0.535 |
| CHEMBL<br>3695734 | 1.386 | 0.999 | CHEMBL<br>3818689 | 2.721 | 2.669 | CHEMBL<br>1834324 | 1.491 | 1.531 | CHEMBL<br>3673179 | 1.000 | 0.677 |
| CHEMBL<br>3688736 | 1.394 | 1.758 | CHEMBL<br>3628184 | 2.724 | 3.216 | CHEMBL<br>3401130 | 1.544 | 1.494 | CHEMBL<br>3703730 | 1.000 | 1.398 |
| CHEMBL<br>3688815 | 1.398 | 1.607 | CHEMBL<br>470867  | 2.732 | 2.713 | CHEMBL<br>2391100 | 1.544 | 1.620 | CHEMBL<br>2333635 | 1.000 | 1.203 |
| CHEMBL<br>3688812 | 1.400 | 1.202 | CHEMBL<br>3752555 | 2.736 | 2.634 | CHEMBL<br>2386105 | 1.553 | 1.328 | CHEMBL<br>2333645 | 1.000 | 1.018 |
| CHEMBL<br>3394052 | 1.403 | 1.604 | CHEMBL<br>3415566 | 2.736 | 2.760 | CHEMBL<br>1940906 | 1.568 | 2.023 | CHEMBL<br>2337602 | 1.000 | 1.144 |
| CHEMBL<br>3394215 | 1.415 | 1.214 | CHEMBL<br>3597056 | 2.740 | 2.899 | CHEMBL<br>3410088 | 1.568 | 1.087 | CHEMBL<br>2337605 | 1.000 | 1.135 |
| CHEMBL<br>3683833 | 1.428 | 1.801 | CHEMBL<br>3416995 | 2.761 | 2.605 | CHEMBL<br>2386103 | 1.599 | 1.408 | CHEMBL<br>3639720 | 1.037 | 0.992 |
| CHEMBL<br>3688636 | 1.438 | 1.655 | CHEMBL<br>3415576 | 2.762 | 2.624 | CHEMBL<br>2064536 | 1.613 | 1.939 | CHEMBL<br>3770663 | 1.041 | 1.428 |
| CHEMBL<br>3683866 | 1.439 | 1.626 | CHEMBL<br>3623561 | 2.762 | 3.109 | CHEMBL<br>3401124 | 1.613 | 1.611 | CHEMBL<br>3673130 | 1.053 | 0.680 |
| CHEMBL<br>3683802 | 1.442 | 1.838 | CHEMBL<br>3628186 | 2.763 | 3.221 | CHEMBL<br>2386099 | 1.614 | 1.514 | CHEMBL<br>3681356 | 1.079 | 1.437 |

|                   |       |       |                   |       |       |                   |       |       |                   |       |       |
|-------------------|-------|-------|-------------------|-------|-------|-------------------|-------|-------|-------------------|-------|-------|
| CHEMBL<br>3688738 | 1.464 | 1.723 | CHEMBL<br>3623553 | 2.772 | 2.599 | CHEMBL<br>2048667 | 1.643 | 1.238 | CHEMBL<br>3681366 | 1.079 | 1.350 |
| CHEMBL<br>3683844 | 1.468 | 1.722 | CHEMBL<br>395280  | 2.778 | 3.222 | CHEMBL<br>3922494 | 1.646 | 1.899 | CHEMBL<br>2333636 | 1.079 | 1.378 |
| CHEMBL<br>3427252 | 1.477 | 1.531 | CHEMBL<br>3764305 | 2.785 | 3.066 | CHEMBL<br>1834117 | 1.653 | 1.803 | CHEMBL<br>2333633 | 1.079 | 1.447 |
| CHEMBL<br>3804970 | 1.491 | 1.184 | CHEMBL<br>3410953 | 2.792 | 2.638 | CHEMBL<br>3891139 | 1.663 | 1.927 | CHEMBL<br>2407334 | 1.079 | 1.461 |
| CHEMBL<br>3688708 | 1.491 | 1.608 | CHEMBL<br>3916769 | 2.799 | 2.651 | CHEMBL<br>2048657 | 1.672 | 1.837 | CHEMBL<br>2338034 | 1.100 | 1.112 |
| CHEMBL<br>3683843 | 1.509 | 1.744 | CHEMBL<br>3415580 | 2.814 | 2.893 | CHEMBL<br>1801633 | 1.672 | 1.467 | CHEMBL<br>2337591 | 1.100 | 1.039 |
| CHEMBL<br>3688627 | 1.511 | 1.604 | CHEMBL<br>435071  | 2.814 | 3.134 | CHEMBL<br>3652544 | 1.681 | 1.454 | CHEMBL<br>2333605 | 1.114 | 0.947 |
| CHEMBL<br>3688822 | 1.525 | 1.441 | CHEMBL<br>3582226 | 2.819 | 3.005 | CHEMBL<br>3960209 | 1.690 | 2.106 | CHEMBL<br>3703733 | 1.146 | 1.529 |
| CHEMBL<br>3634126 | 1.531 | 1.882 | CHEMBL<br>3415581 | 2.836 | 2.888 | CHEMBL<br>1834326 | 1.690 | 2.099 | CHEMBL<br>2333616 | 1.146 | 1.452 |
| CHEMBL<br>3673230 | 1.544 | 1.899 | CHEMBL<br>3828443 | 2.846 | 2.683 | CHEMBL<br>3661029 | 1.699 | 1.595 | CHEMBL<br>3703747 | 1.149 | 1.499 |
| CHEMBL<br>3639876 | 1.547 | 1.735 | CHEMBL<br>3818512 | 2.875 | 2.760 | CHEMBL<br>3091546 | 1.708 | 1.718 | CHEMBL<br>3681358 | 1.176 | 1.468 |
| CHEMBL<br>3683856 | 1.551 | 1.457 | CHEMBL<br>3818801 | 2.878 | 3.306 | CHEMBL<br>3950215 | 1.713 | 1.973 | CHEMBL<br>1852422 | 1.199 | 1.467 |
| CHEMBL<br>3797680 | 1.556 | 1.793 | CHEMBL<br>129837  | 2.881 | 2.993 | CHEMBL<br>2391098 | 1.748 | 1.567 | CHEMBL<br>2338048 | 1.200 | 0.869 |
| CHEMBL<br>3673204 | 1.556 | 1.159 | CHEMBL<br>416     | 2.881 | 2.719 | CHEMBL<br>1834329 | 1.756 | 2.081 | CHEMBL<br>2338035 | 1.200 | 1.052 |
| CHEMBL<br>3969309 | 1.556 | 1.741 | CHEMBL<br>3582229 | 2.890 | 2.794 | CHEMBL<br>1809107 | 1.800 | 1.494 | CHEMBL<br>3703742 | 1.201 | 1.322 |
| CHEMBL<br>3683889 | 1.559 | 1.463 | CHEMBL<br>3586576 | 2.898 | 3.145 | CHEMBL<br>3736223 | 1.806 | 1.952 | CHEMBL<br>1852617 | 1.204 | 1.332 |
| CHEMBL<br>3683915 | 1.563 | 1.652 | CHEMBL<br>3623555 | 2.904 | 3.025 | CHEMBL<br>1834123 | 1.813 | 2.322 | CHEMBL<br>2333607 | 1.204 | 0.774 |
| CHEMBL<br>3683919 | 1.563 | 1.439 | CHEMBL<br>3900401 | 2.911 | 3.128 | CHEMBL<br>3401114 | 1.826 | 1.476 | CHEMBL<br>3673139 | 1.212 | 1.343 |
| CHEMBL<br>3980733 | 1.568 | 1.868 | CHEMBL<br>3785861 | 2.930 | 2.867 | CHEMBL<br>3736086 | 1.845 | 1.799 | CHEMBL<br>1852466 | 1.225 | 1.496 |

|                   |       |       |                   |       |       |                   |       |       |                   |       |       |
|-------------------|-------|-------|-------------------|-------|-------|-------------------|-------|-------|-------------------|-------|-------|
| CHEMBL<br>3688665 | 1.576 | 1.853 | CHEMBL<br>3819531 | 2.931 | 3.243 | CHEMBL<br>2391119 | 1.875 | 2.332 | CHEMBL<br>1852359 | 1.230 | 1.511 |
| CHEMBL<br>3688813 | 1.592 | 1.368 | CHEMBL<br>3921061 | 2.940 | 3.129 | CHEMBL<br>1834325 | 1.875 | 1.642 | CHEMBL<br>3769872 | 1.255 | 1.482 |
| CHEMBL<br>3683878 | 1.597 | 1.757 | CHEMBL<br>3582227 | 2.942 | 2.893 | CHEMBL<br>3091530 | 1.886 | 1.595 | CHEMBL<br>3323177 | 1.255 | 1.043 |
| CHEMBL<br>3798544 | 1.602 | 1.699 | CHEMBL<br>3597061 | 2.944 | 3.241 | CHEMBL<br>1809113 | 1.900 | 1.677 | CHEMBL<br>2407326 | 1.255 | 1.382 |
| CHEMBL<br>3688619 | 1.602 | 1.941 | CHEMBL<br>3944652 | 2.946 | 3.196 | CHEMBL<br>3938281 | 1.903 | 1.873 | CHEMBL<br>3673165 | 1.276 | 0.790 |
| CHEMBL<br>3688737 | 1.669 | 1.774 | CHEMBL<br>3582209 | 2.949 | 2.702 | CHEMBL<br>567958  | 1.906 | 1.949 | CHEMBL<br>1852387 | 1.281 | 1.406 |
| CHEMBL<br>3688656 | 1.671 | 1.782 | CHEMBL<br>3577520 | 2.954 | 2.820 | CHEMBL<br>2386104 | 1.915 | 1.516 | CHEMBL<br>2337598 | 1.300 | 0.912 |
| CHEMBL<br>3688643 | 1.671 | 1.809 | CHEMBL<br>3586199 | 2.959 | 3.010 | CHEMBL<br>3652543 | 1.919 | 1.541 | CHEMBL<br>3703734 | 1.301 | 1.530 |
| CHEMBL<br>3673222 | 1.672 | 1.297 | CHEMBL<br>3586594 | 2.959 | 3.305 | CHEMBL<br>2391099 | 1.919 | 2.021 | CHEMBL<br>2407325 | 1.322 | 1.388 |
| CHEMBL<br>3693230 | 1.681 | 1.695 | CHEMBL<br>3827220 | 2.965 | 2.766 | CHEMBL<br>2391132 | 1.924 | 1.898 | CHEMBL<br>3703726 | 1.330 | 1.708 |
| CHEMBL<br>3394042 | 1.695 | 1.627 | CHEMBL<br>3414597 | 2.972 | 2.665 | CHEMBL<br>3926696 | 1.928 | 1.886 | CHEMBL<br>3310489 | 1.362 | 1.540 |
| CHEMBL<br>3746637 | 1.699 | 2.190 | CHEMBL<br>3764100 | 2.973 | 3.426 | CHEMBL<br>2064518 | 1.934 | 2.316 | CHEMBL<br>3331479 | 1.362 | 1.316 |
| CHEMBL<br>3683872 | 1.699 | 1.874 | CHEMBL<br>3415564 | 2.974 | 2.777 | CHEMBL<br>2391120 | 1.934 | 1.952 | CHEMBL<br>2333641 | 1.362 | 1.373 |
| CHEMBL<br>3688824 | 1.701 | 1.776 | CHEMBL<br>3577508 | 2.978 | 2.938 | CHEMBL<br>3410103 | 1.954 | 2.315 | CHEMBL<br>3952992 | 1.371 | 1.703 |
| CHEMBL<br>3683847 | 1.704 | 1.476 | CHEMBL<br>3410952 | 2.978 | 2.644 | CHEMBL<br>2391129 | 1.954 | 2.193 | CHEMBL<br>3323089 | 1.380 | 1.594 |
| CHEMBL<br>3683879 | 1.706 | 1.825 | CHEMBL<br>3586592 | 2.978 | 3.322 | CHEMBL<br>1834119 | 2.000 | 2.280 | CHEMBL<br>2338040 | 1.400 | 1.242 |
| CHEMBL<br>3798199 | 1.708 | 2.352 | CHEMBL<br>3910830 | 2.991 | 2.743 | CHEMBL<br>1809118 | 2.000 | 1.961 | CHEMBL<br>3703729 | 1.415 | 1.022 |
| CHEMBL<br>3693236 | 1.712 | 1.989 | CHEMBL<br>3950130 | 2.991 | 3.192 | CHEMBL<br>1834121 | 2.041 | 2.337 | CHEMBL<br>3817915 | 1.431 | 1.623 |
| CHEMBL<br>3688728 | 1.718 | 1.911 | CHEMBL<br>3965783 | 2.996 | 2.676 | CHEMBL<br>2386275 | 2.057 | 2.177 | CHEMBL<br>3703749 | 1.446 | 1.166 |

|                   |       |       |                   |       |       |                   |       |       |                   |       |       |
|-------------------|-------|-------|-------------------|-------|-------|-------------------|-------|-------|-------------------|-------|-------|
| CHEMBL<br>3683805 | 1.744 | 1.472 | CHEMBL<br>227075  | 3.000 | 3.196 | CHEMBL<br>1738953 | 2.100 | 1.915 | CHEMBL<br>3323178 | 1.447 | 0.964 |
| CHEMBL<br>3683826 | 1.754 | 2.128 | CHEMBL<br>3586600 | 3.000 | 3.280 | CHEMBL<br>1738951 | 2.100 | 2.408 | CHEMBL<br>3323093 | 1.462 | 1.497 |
| CHEMBL<br>3640259 | 1.763 | 2.245 | CHEMBL<br>3586574 | 3.000 | 3.158 | CHEMBL<br>2391126 | 2.104 | 2.486 | CHEMBL<br>3703740 | 1.473 | 1.258 |
| CHEMBL<br>3673198 | 1.778 | 1.931 | CHEMBL<br>3819320 | 3.004 | 2.826 | CHEMBL<br>2064539 | 2.111 | 2.275 | CHEMBL<br>3681357 | 1.477 | 1.608 |
| CHEMBL<br>3427249 | 1.778 | 1.942 | CHEMBL<br>3763203 | 3.009 | 3.482 | CHEMBL<br>2064517 | 2.114 | 2.115 | CHEMBL<br>3323094 | 1.491 | 1.388 |
| CHEMBL<br>3688617 | 1.785 | 1.902 | CHEMBL<br>3582231 | 3.016 | 2.873 | CHEMBL<br>3093051 | 2.114 | 2.381 | CHEMBL<br>3323105 | 1.491 | 1.701 |
| CHEMBL<br>3936217 | 1.790 | 2.170 | CHEMBL<br>3827284 | 3.019 | 2.667 | CHEMBL<br>2062563 | 2.114 | 1.807 | CHEMBL<br>2337594 | 1.500 | 1.304 |
| CHEMBL<br>3683811 | 1.797 | 1.830 | CHEMBL<br>3763232 | 3.029 | 3.210 | CHEMBL<br>3699443 | 2.127 | 1.643 | CHEMBL<br>3323106 | 1.505 | 1.618 |
| CHEMBL<br>3688632 | 1.805 | 2.006 | CHEMBL<br>3945423 | 3.037 | 2.739 | CHEMBL<br>2386274 | 2.170 | 1.652 | CHEMBL<br>2333613 | 1.505 | 1.133 |
| CHEMBL<br>3673196 | 1.806 | 2.026 | CHEMBL<br>3892044 | 3.049 | 2.841 | CHEMBL<br>3093052 | 2.176 | 2.250 | CHEMBL<br>2407331 | 1.505 | 1.515 |
| CHEMBL<br>3673231 | 1.813 | 2.309 | CHEMBL<br>3765697 | 3.061 | 3.411 | CHEMBL<br>2390958 | 2.185 | 1.735 | CHEMBL<br>3593274 | 1.544 | 1.834 |
| CHEMBL<br>3673206 | 1.833 | 1.846 | CHEMBL<br>3828281 | 3.070 | 2.775 | CHEMBL<br>1809120 | 2.200 | 1.957 | CHEMBL<br>3323097 | 1.544 | 1.247 |
| CHEMBL<br>3427247 | 1.845 | 2.004 | CHEMBL<br>3402718 | 3.075 | 3.528 | CHEMBL<br>1738952 | 2.200 | 2.363 | CHEMBL<br>3593396 | 1.556 | 2.043 |
| CHEMBL<br>3746261 | 1.845 | 2.226 | CHEMBL<br>3582230 | 3.084 | 2.842 | CHEMBL<br>1834316 | 2.204 | 2.164 | CHEMBL<br>3310485 | 1.563 | 1.292 |
| CHEMBL<br>3683845 | 1.864 | 1.975 | CHEMBL<br>3763778 | 3.097 | 3.441 | CHEMBL<br>1834328 | 2.204 | 2.209 | CHEMBL<br>2407327 | 1.568 | 1.627 |
| CHEMBL<br>3673226 | 1.869 | 2.547 | CHEMBL<br>611941  | 3.100 | 3.110 | CHEMBL<br>2391133 | 2.215 | 1.784 | CHEMBL<br>3310487 | 1.574 | 1.560 |
| CHEMBL<br>3672718 | 1.898 | 2.302 | CHEMBL<br>3827011 | 3.114 | 3.412 | CHEMBL<br>2391128 | 2.215 | 1.937 | CHEMBL<br>3310490 | 1.585 | 1.204 |
| CHEMBL<br>3683876 | 1.906 | 2.013 | CHEMBL<br>3628065 | 3.114 | 3.213 | CHEMBL<br>2064519 | 2.220 | 2.003 | CHEMBL<br>3703750 | 1.591 | 2.036 |
| CHEMBL<br>3688821 | 1.908 | 1.456 | CHEMBL<br>3402719 | 3.115 | 3.518 | CHEMBL<br>355496  | 2.241 | 2.268 | CHEMBL<br>3798035 | 1.602 | 1.383 |

|                   |       |       |                   |       |       |                   |       |       |                   |       |       |
|-------------------|-------|-------|-------------------|-------|-------|-------------------|-------|-------|-------------------|-------|-------|
| CHEMBL<br>3683917 | 1.909 | 1.534 | CHEMBL<br>1254269 | 3.117 | 3.054 | CHEMBL<br>2064531 | 2.246 | 2.585 | CHEMBL<br>3323096 | 1.602 | 1.216 |
| CHEMBL<br>3673203 | 1.914 | 1.656 | CHEMBL<br>19215   | 3.128 | 3.058 | CHEMBL<br>3933780 | 2.255 | 2.119 | CHEMBL<br>1852373 | 1.629 | 1.808 |
| CHEMBL<br>3673228 | 1.919 | 2.072 | CHEMBL<br>3930722 | 3.130 | 2.792 | CHEMBL<br>2064535 | 2.267 | 2.044 | CHEMBL<br>3770651 | 1.643 | 2.000 |
| CHEMBL<br>3683873 | 1.921 | 2.013 | CHEMBL<br>3577509 | 3.134 | 2.942 | CHEMBL<br>1834120 | 2.279 | 2.032 | CHEMBL<br>3331498 | 1.651 | 1.940 |
| CHEMBL<br>3683877 | 1.922 | 1.815 | CHEMBL<br>3765093 | 3.143 | 3.350 | CHEMBL<br>2391117 | 2.290 | 2.303 | CHEMBL<br>3310484 | 1.666 | 1.275 |
| CHEMBL<br>3683881 | 1.927 | 2.227 | CHEMBL<br>3818992 | 3.161 | 2.683 | CHEMBL<br>3736164 | 2.301 | 2.444 | CHEMBL<br>3310483 | 1.673 | 1.487 |
| CHEMBL<br>3683916 | 1.938 | 1.698 | CHEMBL<br>3958208 | 3.170 | 2.865 | CHEMBL<br>3093047 | 2.301 | 2.418 | CHEMBL<br>3317694 | 1.699 | 1.597 |
| CHEMBL<br>3683858 | 1.941 | 2.230 | CHEMBL<br>3961103 | 3.176 | 3.641 | CHEMBL<br>3661030 | 2.301 | 1.910 | CHEMBL<br>1852774 | 1.714 | 1.824 |
| CHEMBL<br>3933659 | 1.949 | 2.257 | CHEMBL<br>3818230 | 3.176 | 3.448 | CHEMBL<br>3652546 | 2.301 | 1.760 | CHEMBL<br>3703725 | 1.731 | 1.630 |
| CHEMBL<br>3918935 | 1.949 | 2.409 | CHEMBL<br>3586614 | 3.176 | 2.936 | CHEMBL<br>2391130 | 2.352 | 2.250 | CHEMBL<br>3310486 | 1.764 | 1.554 |
| CHEMBL<br>3688654 | 1.952 | 2.297 | CHEMBL<br>3818167 | 3.179 | 3.307 | CHEMBL<br>3734956 | 2.362 | 2.869 | CHEMBL<br>3797621 | 1.778 | 1.762 |
| CHEMBL<br>3688719 | 1.956 | 2.324 | CHEMBL<br>3763820 | 3.188 | 3.370 | CHEMBL<br>2064537 | 2.367 | 2.291 | CHEMBL<br>3703745 | 1.786 | 1.373 |
| CHEMBL<br>3688640 | 1.958 | 1.790 | CHEMBL<br>3824239 | 3.188 | 3.296 | CHEMBL<br>2391123 | 2.369 | 2.643 | CHEMBL<br>2380972 | 1.806 | 1.722 |
| CHEMBL<br>3688612 | 1.963 | 2.069 | CHEMBL<br>3818415 | 3.188 | 3.278 | CHEMBL<br>3410099 | 2.380 | 2.776 | CHEMBL<br>1852516 | 1.820 | 1.590 |
| CHEMBL<br>3640275 | 1.968 | 1.546 | CHEMBL<br>3819155 | 3.188 | 3.281 | CHEMBL<br>1940904 | 2.398 | 2.514 | CHEMBL<br>3818471 | 1.826 | 1.476 |
| CHEMBL<br>3634124 | 1.968 | 2.195 | CHEMBL<br>3787116 | 3.207 | 2.703 | CHEMBL<br>3735962 | 2.398 | 2.555 | CHEMBL<br>3323092 | 1.826 | 1.510 |
| CHEMBL<br>3688695 | 1.971 | 1.713 | CHEMBL<br>2163795 | 3.228 | 3.642 | CHEMBL<br>1940908 | 2.398 | 2.230 | CHEMBL<br>1852361 | 1.827 | 1.864 |
| CHEMBL<br>3683808 | 1.987 | 2.306 | CHEMBL<br>481     | 3.262 | 3.136 | CHEMBL<br>3735613 | 2.415 | 2.021 | CHEMBL<br>1852777 | 1.852 | 1.628 |
| CHEMBL<br>3683855 | 1.987 | 1.907 | CHEMBL<br>3402708 | 3.263 | 3.558 | CHEMBL<br>1834115 | 2.462 | 2.614 | CHEMBL<br>3310478 | 1.857 | 1.441 |



|                   |       |       |                   |       |       |                   |       |       |                   |       |       |
|-------------------|-------|-------|-------------------|-------|-------|-------------------|-------|-------|-------------------|-------|-------|
| CHEMBL<br>3688722 | 1.996 | 1.655 | CHEMBL<br>489354  | 3.265 | 2.940 | CHEMBL<br>3661032 | 2.477 | 2.243 | CHEMBL<br>2407335 | 1.898 | 1.813 |
| CHEMBL<br>3683874 | 1.996 | 1.951 | CHEMBL<br>171048  | 3.281 | 3.200 | CHEMBL<br>2022413 | 2.477 | 2.523 | CHEMBL<br>1852472 | 1.914 | 1.602 |
| CHEMBL<br>3688615 | 1.999 | 2.144 | CHEMBL<br>524100  | 3.288 | 2.790 | CHEMBL<br>2022415 | 2.477 | 2.685 | CHEMBL<br>1852659 | 1.924 | 1.965 |
| CHEMBL<br>3688664 | 2.017 | 1.956 | CHEMBL<br>3973337 | 3.297 | 3.231 | CHEMBL<br>3734985 | 2.491 | 2.414 | CHEMBL<br>3818953 | 1.929 | 1.466 |
| CHEMBL<br>3688616 | 2.028 | 2.291 | CHEMBL<br>3402713 | 3.299 | 3.406 | CHEMBL<br>3647953 | 2.491 | 2.428 | CHEMBL<br>2430680 | 1.932 | 1.664 |
| CHEMBL<br>3673197 | 2.029 | 2.068 | CHEMBL<br>3577524 | 3.301 | 2.809 | CHEMBL<br>2064515 | 2.500 | 2.203 | CHEMBL<br>3323107 | 1.982 | 1.732 |
| CHEMBL<br>3650826 | 2.037 | 2.162 | CHEMBL<br>3415579 | 3.303 | 2.906 | CHEMBL<br>1809117 | 2.500 | 2.179 | CHEMBL<br>3593395 | 1.987 | 2.046 |
| CHEMBL<br>3427253 | 2.041 | 2.284 | CHEMBL<br>2071425 | 3.303 | 3.225 | CHEMBL<br>1809122 | 2.500 | 2.494 | CHEMBL<br>2380979 | 1.987 | 2.019 |
| CHEMBL<br>3903848 | 2.059 | 2.352 | CHEMBL<br>3828028 | 3.322 | 3.416 | CHEMBL<br>1809121 | 2.500 | 2.484 | CHEMBL<br>2430681 | 1.997 | 1.909 |
| CHEMBL<br>3693233 | 2.062 | 2.066 | CHEMBL<br>3415559 | 3.323 | 2.934 | CHEMBL<br>3735529 | 2.519 | 2.003 | CHEMBL<br>3331507 | 2.000 | 1.642 |
| CHEMBL<br>3422244 | 2.064 | 2.188 | CHEMBL<br>3597006 | 3.332 | 3.202 | CHEMBL<br>3736462 | 2.544 | 2.646 | CHEMBL<br>3703741 | 2.003 | 2.053 |
| CHEMBL<br>3688729 | 2.070 | 1.800 | CHEMBL<br>3819646 | 3.334 | 3.435 | CHEMBL<br>3943352 | 2.551 | 2.654 | CHEMBL<br>3612833 | 2.033 | 2.353 |
| CHEMBL<br>3683789 | 2.070 | 2.089 | CHEMBL<br>221753  | 3.351 | 3.752 | CHEMBL<br>3734911 | 2.556 | 2.708 | CHEMBL<br>3331484 | 2.057 | 1.647 |
| CHEMBL<br>3688620 | 2.077 | 1.692 | CHEMBL<br>3582212 | 3.384 | 3.470 | CHEMBL<br>1834113 | 2.643 | 2.659 | CHEMBL<br>3593394 | 2.079 | 2.010 |
| CHEMBL<br>3747766 | 2.079 | 2.109 | CHEMBL<br>3632852 | 3.398 | 2.863 | CHEMBL<br>3093042 | 2.699 | 2.991 | CHEMBL<br>2407330 | 2.079 | 1.661 |
| CHEMBL<br>3683857 | 2.085 | 2.180 | CHEMBL<br>3623566 | 3.398 | 3.441 | CHEMBL<br>2024372 | 2.699 | 2.546 | CHEMBL<br>3126963 | 2.114 | 1.999 |
| CHEMBL<br>3688709 | 2.088 | 2.160 | CHEMBL<br>2071424 | 3.418 | 3.431 | CHEMBL<br>3735772 | 2.724 | 2.434 | CHEMBL<br>3331505 | 2.114 | 1.779 |
| CHEMBL<br>3688626 | 2.094 | 2.224 | CHEMBL<br>3582210 | 3.430 | 2.968 | CHEMBL<br>454662  | 2.724 | 3.172 | CHEMBL<br>2407332 | 2.114 | 1.705 |
| CHEMBL<br>3683892 | 2.097 | 2.114 | CHEMBL<br>3628059 | 3.431 | 3.877 | CHEMBL<br>3735095 | 2.724 | 2.638 | CHEMBL<br>2333622 | 2.146 | 2.209 |

|                   |       |       |                   |       |       |                   |       |       |                   |       |       |
|-------------------|-------|-------|-------------------|-------|-------|-------------------|-------|-------|-------------------|-------|-------|
| CHEMBL<br>3688663 | 2.099 | 2.585 | CHEMBL<br>334255  | 3.440 | 3.133 | CHEMBL<br>3735445 | 2.733 | 3.068 | CHEMBL<br>2347692 | 2.146 | 2.169 |
| CHEMBL<br>3683904 | 2.106 | 2.100 | CHEMBL<br>3597060 | 3.446 | 3.187 | CHEMBL<br>3736122 | 2.748 | 2.445 | CHEMBL<br>2380974 | 2.146 | 1.780 |
| CHEMBL<br>3650831 | 2.107 | 1.926 | CHEMBL<br>3926911 | 3.456 | 3.099 | CHEMBL<br>3736196 | 2.748 | 2.550 | CHEMBL<br>3593400 | 2.176 | 2.522 |
| CHEMBL<br>3693228 | 2.109 | 1.996 | CHEMBL<br>496     | 3.479 | 2.994 | CHEMBL<br>3736396 | 2.763 | 2.681 | CHEMBL<br>2347855 | 2.176 | 2.406 |
| CHEMBL<br>3683885 | 2.116 | 1.824 | CHEMBL<br>636     | 3.481 | 3.263 | CHEMBL<br>3736418 | 2.763 | 2.489 | CHEMBL<br>3681361 | 2.215 | 1.768 |
| CHEMBL<br>3683801 | 2.129 | 2.066 | CHEMBL<br>145361  | 3.493 | 3.147 | CHEMBL<br>1801635 | 2.763 | 2.870 | CHEMBL<br>2347856 | 2.230 | 2.484 |
| CHEMBL<br>3703303 | 2.137 | 1.923 | CHEMBL<br>3976003 | 3.502 | 3.886 | CHEMBL<br>1834110 | 2.778 | 2.753 | CHEMBL<br>3126977 | 2.279 | 2.641 |
| CHEMBL<br>3650849 | 2.140 | 2.360 | CHEMBL<br>1555    | 3.505 | 3.134 | CHEMBL<br>2022418 | 2.778 | 2.924 | CHEMBL<br>3764774 | 2.301 | 2.029 |
| CHEMBL<br>3688724 | 2.151 | 1.898 | CHEMBL<br>3628056 | 3.505 | 3.796 | CHEMBL<br>3410102 | 2.785 | 3.311 | CHEMBL<br>3593392 | 2.301 | 2.147 |
| CHEMBL<br>3688625 | 2.154 | 2.275 | CHEMBL<br>3984034 | 3.508 | 3.843 | CHEMBL<br>1809115 | 2.800 | 2.370 | CHEMBL<br>3593275 | 2.301 | 2.166 |
| CHEMBL<br>3703285 | 2.155 | 1.635 | CHEMBL<br>3765569 | 3.511 | 3.481 | CHEMBL<br>3735755 | 2.806 | 3.126 | CHEMBL<br>1201066 | 2.310 | 1.994 |
| CHEMBL<br>3683905 | 2.155 | 1.690 | CHEMBL<br>3763609 | 3.517 | 3.362 | CHEMBL<br>3736404 | 2.826 | 2.604 | CHEMBL<br>3126961 | 2.322 | 2.490 |
| CHEMBL<br>3693229 | 2.161 | 2.005 | CHEMBL<br>3972214 | 3.519 | 3.855 | CHEMBL<br>3735293 | 2.839 | 2.353 | CHEMBL<br>3331468 | 2.430 | 2.000 |
| CHEMBL<br>3688635 | 2.163 | 1.943 | CHEMBL<br>3818332 | 3.519 | 3.145 | CHEMBL<br>3408213 | 2.839 | 2.848 | CHEMBL<br>3799356 | 2.431 | 1.998 |
| CHEMBL<br>3673205 | 2.176 | 1.934 | CHEMBL<br>3628062 | 3.519 | 3.346 | CHEMBL<br>3410098 | 2.863 | 3.142 | CHEMBL<br>3799596 | 2.447 | 2.494 |
| CHEMBL<br>3960008 | 2.176 | 2.522 | CHEMBL<br>3765476 | 3.528 | 3.458 | CHEMBL<br>3901767 | 2.876 | 2.515 | CHEMBL<br>3799668 | 2.447 | 2.039 |
| CHEMBL<br>3688621 | 2.179 | 2.271 | CHEMBL<br>3628058 | 3.531 | 3.797 | CHEMBL<br>1682842 | 2.903 | 2.847 | CHEMBL<br>3126967 | 2.447 | 2.811 |
| CHEMBL<br>3703233 | 2.188 | 2.318 | CHEMBL<br>3949439 | 3.543 | 3.013 | CHEMBL<br>483841  | 2.903 | 3.062 | CHEMBL<br>3799795 | 2.477 | 2.217 |
| CHEMBL<br>3910646 | 2.204 | 2.218 | CHEMBL<br>3763973 | 3.549 | 3.498 | CHEMBL<br>2022417 | 2.903 | 3.297 | CHEMBL<br>3906576 | 2.486 | 2.398 |

|                   |       |       |                   |       |       |                   |       |       |                   |       |       |
|-------------------|-------|-------|-------------------|-------|-------|-------------------|-------|-------|-------------------|-------|-------|
| CHEMBL<br>3959813 | 2.204 | 2.399 | CHEMBL<br>3822890 | 3.551 | 3.363 | CHEMBL<br>3673435 | 2.933 | 2.748 | CHEMBL<br>3612835 | 2.509 | 2.394 |
| CHEMBL<br>3654232 | 2.207 | 2.471 | CHEMBL<br>3763482 | 3.569 | 3.541 | CHEMBL<br>3735497 | 2.940 | 2.544 | CHEMBL<br>3593391 | 2.519 | 2.129 |
| CHEMBL<br>3688659 | 2.217 | 2.530 | CHEMBL<br>3822559 | 3.580 | 3.340 | CHEMBL<br>1834331 | 2.954 | 2.500 | CHEMBL<br>3334801 | 2.528 | 2.106 |
| CHEMBL<br>3654216 | 2.262 | 2.640 | CHEMBL<br>3628063 | 3.580 | 3.467 | CHEMBL<br>3763944 | 2.954 | 3.284 | CHEMBL<br>2407321 | 2.531 | 2.291 |
| CHEMBL<br>3688721 | 2.264 | 2.052 | CHEMBL<br>3764679 | 3.587 | 3.519 | CHEMBL<br>2022419 | 2.954 | 2.928 | CHEMBL<br>3334797 | 2.578 | 2.983 |
| CHEMBL<br>3688609 | 2.267 | 2.809 | CHEMBL<br>3586605 | 3.591 | 3.380 | CHEMBL<br>2022421 | 2.954 | 2.543 | CHEMBL<br>3818345 | 2.580 | 2.611 |
| CHEMBL<br>3683882 | 2.267 | 1.912 | CHEMBL<br>3628057 | 3.591 | 3.796 | CHEMBL<br>3673434 | 2.956 | 2.938 | CHEMBL<br>3334776 | 2.590 | 2.787 |
| CHEMBL<br>3683922 | 2.280 | 2.702 | CHEMBL<br>3765496 | 3.598 | 3.597 | CHEMBL<br>3951486 | 3.013 | 3.011 | CHEMBL<br>3334799 | 2.601 | 2.964 |
| CHEMBL<br>3683898 | 2.289 | 2.608 | CHEMBL<br>3892118 | 3.613 | 3.744 | CHEMBL<br>2022420 | 3.041 | 3.113 | CHEMBL<br>3334794 | 2.603 | 2.564 |
| CHEMBL<br>3688707 | 2.291 | 2.188 | CHEMBL<br>3628055 | 3.623 | 3.950 | CHEMBL<br>2024374 | 3.041 | 2.678 | CHEMBL<br>3798279 | 2.623 | 2.173 |
| CHEMBL<br>3654219 | 2.297 | 2.486 | CHEMBL<br>3770206 | 3.663 | 3.525 | CHEMBL<br>2022423 | 3.041 | 3.268 | CHEMBL<br>3612825 | 2.625 | 3.050 |
| CHEMBL<br>3986498 | 2.362 | 2.278 | CHEMBL<br>3823464 | 3.666 | 3.318 | CHEMBL<br>3735382 | 3.079 | 2.620 | CHEMBL<br>3334793 | 2.652 | 2.345 |
| CHEMBL<br>3427246 | 2.362 | 2.329 | CHEMBL<br>1262    | 3.667 | 3.847 | CHEMBL<br>2024371 | 3.079 | 2.771 | CHEMBL<br>3593404 | 2.681 | 2.521 |
| CHEMBL<br>3586197 | 2.362 | 2.459 | CHEMBL<br>3765162 | 3.686 | 3.589 | CHEMBL<br>3093040 | 3.114 | 3.145 | CHEMBL<br>3334800 | 2.700 | 2.906 |
| CHEMBL<br>3683903 | 2.380 | 2.235 | CHEMBL<br>3822670 | 3.694 | 3.307 | CHEMBL<br>3093036 | 3.114 | 2.872 | CHEMBL<br>3331504 | 2.714 | 2.431 |
| CHEMBL<br>3673217 | 2.384 | 2.935 | CHEMBL<br>577016  | 3.708 | 3.972 | CHEMBL<br>2024359 | 3.114 | 3.123 | CHEMBL<br>3126959 | 2.716 | 2.716 |
| CHEMBL<br>3688752 | 2.385 | 2.818 | CHEMBL<br>3623565 | 3.715 | 3.396 | CHEMBL<br>3911190 | 3.161 | 2.946 | CHEMBL<br>3126972 | 2.724 | 2.261 |
| CHEMBL<br>3688690 | 2.390 | 2.625 | CHEMBL<br>653     | 3.749 | 3.486 | CHEMBL<br>151     | 3.176 | 3.246 | CHEMBL<br>3334798 | 2.737 | 3.151 |
| CHEMBL<br>3650822 | 2.394 | 2.020 | CHEMBL<br>3752227 | 3.752 | 3.210 | CHEMBL<br>2312290 | 3.225 | 3.031 | CHEMBL<br>3799481 | 2.748 | 2.258 |

|                   |       |       |                   |       |       |                   |       |       |                   |       |       |
|-------------------|-------|-------|-------------------|-------|-------|-------------------|-------|-------|-------------------|-------|-------|
| CHEMBL<br>3984088 | 2.398 | 2.169 | CHEMBL<br>3628060 | 3.756 | 3.873 | CHEMBL<br>3787112 | 3.255 | 3.070 | CHEMBL<br>2347691 | 2.756 | 2.676 |
| CHEMBL<br>3683860 | 2.401 | 2.621 | CHEMBL<br>3770356 | 3.763 | 3.336 | CHEMBL<br>2022422 | 3.255 | 2.774 | CHEMBL<br>3963788 | 2.778 | 2.369 |
| CHEMBL<br>3693257 | 2.402 | 2.484 | CHEMBL<br>64894   | 3.767 | 3.637 | CHEMBL<br>28      | 3.279 | 3.376 | CHEMBL<br>2347695 | 2.820 | 2.380 |
| CHEMBL<br>3634338 | 2.410 | 2.465 | CHEMBL<br>1801816 | 3.771 | 3.514 | CHEMBL<br>3093044 | 3.279 | 3.006 | CHEMBL<br>3593405 | 2.833 | 2.522 |
| CHEMBL<br>3654221 | 2.415 | 2.847 | CHEMBL<br>3763417 | 3.775 | 3.512 | CHEMBL<br>50      | 3.301 | 3.444 | CHEMBL<br>3126965 | 2.833 | 2.725 |
| CHEMBL<br>3688717 | 2.433 | 2.219 | CHEMBL<br>3763832 | 3.777 | 3.429 | CHEMBL<br>2024361 | 3.301 | 2.973 | CHEMBL<br>3763998 | 2.903 | 2.422 |
| CHEMBL<br>3703234 | 2.441 | 2.709 | CHEMBL<br>3586602 | 3.778 | 3.429 | CHEMBL<br>3765061 | 3.303 | 3.120 | CHEMBL<br>3126969 | 2.987 | 2.706 |
| CHEMBL<br>3688662 | 2.452 | 2.044 | CHEMBL<br>1327885 | 3.792 | 3.554 | CHEMBL<br>3763318 | 3.320 | 3.239 | CHEMBL<br>2347703 | 2.987 | 2.746 |
| CHEMBL<br>3688745 | 2.463 | 2.361 | CHEMBL<br>239618  | 3.799 | 3.547 | CHEMBL<br>3093037 | 3.322 | 2.973 | CHEMBL<br>281594  | 3.584 | 3.520 |
| CHEMBL<br>3688716 | 2.478 | 2.407 | CHEMBL<br>3764065 | 3.804 | 3.562 | CHEMBL<br>3093046 | 3.342 | 3.025 |                   |       |       |
| CHEMBL<br>3654215 | 2.479 | 2.878 | CHEMBL<br>3957099 | 3.806 | 3.700 | CHEMBL<br>3093038 | 3.380 | 2.926 |                   |       |       |
| CHEMBL<br>3688718 | 2.496 | 2.099 | CHEMBL<br>1079905 | 3.806 | 3.367 | CHEMBL<br>3763728 | 3.396 | 3.212 |                   |       |       |
| CHEMBL<br>3654223 | 2.500 | 2.754 | CHEMBL<br>3770071 | 3.806 | 3.374 | CHEMBL<br>464381  | 3.410 | 3.712 |                   |       |       |
| CHEMBL<br>3703255 | 2.500 | 2.442 | CHEMBL<br>1200623 | 3.813 | 3.357 | CHEMBL<br>3763815 | 3.444 | 3.165 |                   |       |       |
| CHEMBL<br>3673191 | 2.505 | 2.436 | CHEMBL<br>3764900 | 3.819 | 3.461 | CHEMBL<br>2313853 | 3.519 | 3.138 |                   |       |       |
| CHEMBL<br>3688747 | 2.530 | 2.556 | CHEMBL<br>3764488 | 3.827 | 3.500 | CHEMBL<br>2313850 | 3.602 | 3.259 |                   |       |       |
| CHEMBL<br>3703281 | 2.542 | 2.694 | CHEMBL<br>3764433 | 3.850 | 3.518 | CHEMBL<br>3298402 | 3.664 | 3.504 |                   |       |       |
| CHEMBL<br>3650825 | 2.543 | 2.631 | CHEMBL<br>240047  | 3.851 | 3.935 | CHEMBL<br>102953  | 3.699 | 4.136 |                   |       |       |
| CHEMBL<br>3677240 | 2.568 | 3.000 | CHEMBL<br>113     | 3.860 | 3.826 | CHEMBL<br>3765319 | 3.745 | 3.801 |                   |       |       |

|                   |       |       |                   |       |       |                   |       |       |  |  |  |
|-------------------|-------|-------|-------------------|-------|-------|-------------------|-------|-------|--|--|--|
| CHEMBL<br>3673201 | 2.575 | 2.368 | CHEMBL<br>394753  | 3.869 | 4.029 | CHEMBL<br>219346  | 3.760 | 3.832 |  |  |  |
| CHEMBL<br>3650833 | 2.589 | 2.475 | CHEMBL<br>305660  | 3.874 | 3.493 | CHEMBL<br>218301  | 3.790 | 3.993 |  |  |  |
| CHEMBL<br>3703266 | 2.589 | 2.439 | CHEMBL<br>3770516 | 3.875 | 3.969 | CHEMBL<br>140     | 4.254 | 3.954 |  |  |  |
| CHEMBL<br>3650772 | 2.590 | 2.922 | CHEMBL<br>3764714 | 3.887 | 3.399 | CHEMBL<br>1668411 | 4.255 | 4.190 |  |  |  |
| CHEMBL<br>3765050 | 2.591 | 2.790 | CHEMBL<br>3824057 | 3.895 | 3.367 | CHEMBL<br>2334786 | 4.630 | 4.596 |  |  |  |
| CHEMBL<br>3654228 | 2.591 | 2.486 | CHEMBL<br>3770866 | 3.898 | 3.927 | CHEMBL<br>105712  | 4.699 | 4.265 |  |  |  |
| CHEMBL<br>3693239 | 2.598 | 2.727 | CHEMBL<br>239400  | 3.903 | 4.046 |                   |       |       |  |  |  |
| CHEMBL<br>3764532 | 2.602 | 2.554 | CHEMBL<br>3586604 | 3.929 | 3.409 |                   |       |       |  |  |  |
| CHEMBL<br>3650774 | 2.603 | 2.915 | CHEMBL<br>1801815 | 3.996 | 4.004 |                   |       |       |  |  |  |
| CHEMBL<br>3672721 | 2.614 | 3.041 | CHEMBL<br>3786666 | 4.130 | 3.638 |                   |       |       |  |  |  |
| CHEMBL<br>3673227 | 2.616 | 2.844 | CHEMBL<br>808     | 4.136 | 3.779 |                   |       |       |  |  |  |
| CHEMBL<br>3752926 | 2.633 | 2.550 | CHEMBL<br>91      | 4.271 | 3.767 |                   |       |       |  |  |  |
| CHEMBL<br>3969436 | 2.639 | 2.402 | CHEMBL<br>3628061 | 4.360 | 4.055 |                   |       |       |  |  |  |
| CHEMBL<br>3654226 | 2.642 | 2.794 | CHEMBL<br>3628054 | 4.456 | 3.862 |                   |       |       |  |  |  |
| CHEMBL<br>3654229 | 2.647 | 2.838 | CHEMBL<br>3628053 | 4.484 | 4.001 |                   |       |       |  |  |  |
| CHEMBL<br>3654230 | 2.669 | 2.726 | CHEMBL<br>426113  | 5.223 | 5.226 |                   |       |       |  |  |  |
| CHEMBL<br>3654218 | 2.675 | 2.354 |                   |       |       |                   |       |       |  |  |  |
| CHEMBL<br>3746896 | 2.681 | 2.618 |                   |       |       |                   |       |       |  |  |  |
| CHEMBL<br>3677236 | 2.681 | 2.778 |                   |       |       |                   |       |       |  |  |  |

|                   |       |       |  |  |  |  |  |  |  |  |  |
|-------------------|-------|-------|--|--|--|--|--|--|--|--|--|
| CHEMBL<br>3693253 | 2.699 | 2.483 |  |  |  |  |  |  |  |  |  |
| CHEMBL<br>3890737 | 2.708 | 2.348 |  |  |  |  |  |  |  |  |  |
| CHEMBL<br>3422235 | 2.708 | 2.869 |  |  |  |  |  |  |  |  |  |
| CHEMBL<br>3672708 | 2.713 | 3.053 |  |  |  |  |  |  |  |  |  |
| CHEMBL<br>3688691 | 2.720 | 2.650 |  |  |  |  |  |  |  |  |  |
| CHEMBL<br>3650801 | 2.769 | 2.293 |  |  |  |  |  |  |  |  |  |
| CHEMBL<br>3422239 | 2.777 | 2.757 |  |  |  |  |  |  |  |  |  |
| CHEMBL<br>3900541 | 2.778 | 2.497 |  |  |  |  |  |  |  |  |  |
| CHEMBL<br>3693256 | 2.781 | 2.472 |  |  |  |  |  |  |  |  |  |
| CHEMBL<br>3677231 | 2.785 | 2.506 |  |  |  |  |  |  |  |  |  |
| CHEMBL<br>3672414 | 2.799 | 2.556 |  |  |  |  |  |  |  |  |  |
| CHEMBL<br>3650768 | 2.803 | 2.550 |  |  |  |  |  |  |  |  |  |
| CHEMBL<br>3747445 | 2.806 | 2.659 |  |  |  |  |  |  |  |  |  |
| CHEMBL<br>3703288 | 2.817 | 2.286 |  |  |  |  |  |  |  |  |  |
| CHEMBL<br>3745922 | 2.820 | 3.114 |  |  |  |  |  |  |  |  |  |
| CHEMBL<br>3650820 | 2.820 | 2.889 |  |  |  |  |  |  |  |  |  |
| CHEMBL<br>3747444 | 2.826 | 2.432 |  |  |  |  |  |  |  |  |  |
| CHEMBL<br>3747381 | 2.857 | 2.333 |  |  |  |  |  |  |  |  |  |
| CHEMBL<br>3747247 | 2.857 | 2.558 |  |  |  |  |  |  |  |  |  |

|                   |       |       |  |  |  |  |  |  |  |  |  |
|-------------------|-------|-------|--|--|--|--|--|--|--|--|--|
| CHEMBL<br>3765711 | 2.863 | 2.936 |  |  |  |  |  |  |  |  |  |
| CHEMBL<br>3677226 | 2.869 | 2.475 |  |  |  |  |  |  |  |  |  |
| CHEMBL<br>3703290 | 2.869 | 2.431 |  |  |  |  |  |  |  |  |  |
| CHEMBL<br>3650782 | 2.880 | 2.841 |  |  |  |  |  |  |  |  |  |
| CHEMBL<br>3650769 | 2.888 | 2.634 |  |  |  |  |  |  |  |  |  |
| CHEMBL<br>3672413 | 2.898 | 2.496 |  |  |  |  |  |  |  |  |  |
| CHEMBL<br>3422240 | 2.903 | 2.800 |  |  |  |  |  |  |  |  |  |
| CHEMBL<br>3672410 | 2.908 | 2.911 |  |  |  |  |  |  |  |  |  |
| CHEMBL<br>3688668 | 2.914 | 2.979 |  |  |  |  |  |  |  |  |  |
| CHEMBL<br>3691360 | 2.917 | 3.498 |  |  |  |  |  |  |  |  |  |
| CHEMBL<br>3703272 | 2.918 | 2.648 |  |  |  |  |  |  |  |  |  |
| CHEMBL<br>3677217 | 2.919 | 2.702 |  |  |  |  |  |  |  |  |  |
| CHEMBL<br>3650798 | 2.939 | 2.955 |  |  |  |  |  |  |  |  |  |
| CHEMBL<br>3688611 | 2.940 | 2.893 |  |  |  |  |  |  |  |  |  |
| CHEMBL<br>3650814 | 2.944 | 2.919 |  |  |  |  |  |  |  |  |  |
| CHEMBL<br>3691362 | 2.961 | 3.340 |  |  |  |  |  |  |  |  |  |
| CHEMBL<br>3677208 | 2.964 | 2.836 |  |  |  |  |  |  |  |  |  |
| CHEMBL<br>3650790 | 2.968 | 2.652 |  |  |  |  |  |  |  |  |  |
| CHEMBL<br>3650777 | 2.970 | 2.947 |  |  |  |  |  |  |  |  |  |

|                   |       |       |  |  |  |  |  |  |  |  |  |
|-------------------|-------|-------|--|--|--|--|--|--|--|--|--|
| CHEMBL<br>3763944 | 2.987 | 2.818 |  |  |  |  |  |  |  |  |  |
| CHEMBL<br>3650807 | 2.997 | 2.528 |  |  |  |  |  |  |  |  |  |
| CHEMBL<br>3703220 | 3.004 | 3.275 |  |  |  |  |  |  |  |  |  |
| CHEMBL<br>3764465 | 3.017 | 3.075 |  |  |  |  |  |  |  |  |  |
| CHEMBL<br>3703236 | 3.025 | 2.769 |  |  |  |  |  |  |  |  |  |
| CHEMBL<br>3703301 | 3.025 | 3.132 |  |  |  |  |  |  |  |  |  |
| CHEMBL<br>3650795 | 3.027 | 2.740 |  |  |  |  |  |  |  |  |  |
| CHEMBL<br>3763264 | 3.033 | 2.799 |  |  |  |  |  |  |  |  |  |
| CHEMBL<br>3672419 | 3.041 | 2.838 |  |  |  |  |  |  |  |  |  |
| CHEMBL<br>3672442 | 3.079 | 2.317 |  |  |  |  |  |  |  |  |  |
| CHEMBL<br>3672436 | 3.079 | 3.048 |  |  |  |  |  |  |  |  |  |
| CHEMBL<br>3672408 | 3.079 | 2.900 |  |  |  |  |  |  |  |  |  |
| CHEMBL<br>3672401 | 3.079 | 3.005 |  |  |  |  |  |  |  |  |  |
| CHEMBL<br>3677228 | 3.079 | 3.102 |  |  |  |  |  |  |  |  |  |
| CHEMBL<br>3672426 | 3.079 | 3.180 |  |  |  |  |  |  |  |  |  |
| CHEMBL<br>3672425 | 3.079 | 2.679 |  |  |  |  |  |  |  |  |  |
| CHEMBL<br>3691376 | 3.093 | 3.381 |  |  |  |  |  |  |  |  |  |
| CHEMBL<br>3703239 | 3.093 | 3.169 |  |  |  |  |  |  |  |  |  |
| CHEMBL<br>3650775 | 3.100 | 2.901 |  |  |  |  |  |  |  |  |  |



|                   |       |       |  |  |  |  |  |  |  |  |  |
|-------------------|-------|-------|--|--|--|--|--|--|--|--|--|
| CHEMBL<br>3672417 | 3.114 | 2.904 |  |  |  |  |  |  |  |  |  |
| CHEMBL<br>3891320 | 3.114 | 3.005 |  |  |  |  |  |  |  |  |  |
| CHEMBL<br>3752467 | 3.130 | 3.161 |  |  |  |  |  |  |  |  |  |
| CHEMBL<br>3414701 | 3.143 | 3.362 |  |  |  |  |  |  |  |  |  |
| CHEMBL<br>3672439 | 3.146 | 2.986 |  |  |  |  |  |  |  |  |  |
| CHEMBL<br>3672404 | 3.146 | 3.154 |  |  |  |  |  |  |  |  |  |
| CHEMBL<br>3677218 | 3.146 | 2.231 |  |  |  |  |  |  |  |  |  |
| CHEMBL<br>3672440 | 3.146 | 2.980 |  |  |  |  |  |  |  |  |  |
| CHEMBL<br>3677242 | 3.146 | 3.020 |  |  |  |  |  |  |  |  |  |
| CHEMBL<br>3650813 | 3.161 | 3.078 |  |  |  |  |  |  |  |  |  |
| CHEMBL<br>3703259 | 3.170 | 2.876 |  |  |  |  |  |  |  |  |  |
| CHEMBL<br>3703261 | 3.170 | 2.851 |  |  |  |  |  |  |  |  |  |
| CHEMBL<br>3677220 | 3.176 | 2.984 |  |  |  |  |  |  |  |  |  |
| CHEMBL<br>3672411 | 3.176 | 2.949 |  |  |  |  |  |  |  |  |  |
| CHEMBL<br>3703209 | 3.193 | 2.718 |  |  |  |  |  |  |  |  |  |
| CHEMBL<br>3672407 | 3.204 | 3.111 |  |  |  |  |  |  |  |  |  |
| CHEMBL<br>3672447 | 3.204 | 3.263 |  |  |  |  |  |  |  |  |  |
| CHEMBL<br>3672415 | 3.204 | 3.312 |  |  |  |  |  |  |  |  |  |
| CHEMBL<br>3703296 | 3.207 | 2.996 |  |  |  |  |  |  |  |  |  |

|                   |       |       |  |  |  |  |  |  |  |  |  |
|-------------------|-------|-------|--|--|--|--|--|--|--|--|--|
| CHEMBL<br>3928706 | 3.220 | 3.026 |  |  |  |  |  |  |  |  |  |
| CHEMBL<br>3650770 | 3.223 | 2.881 |  |  |  |  |  |  |  |  |  |
| CHEMBL<br>3672406 | 3.230 | 3.481 |  |  |  |  |  |  |  |  |  |
| CHEMBL<br>3677244 | 3.230 | 3.034 |  |  |  |  |  |  |  |  |  |
| CHEMBL<br>3703300 | 3.262 | 2.793 |  |  |  |  |  |  |  |  |  |
| CHEMBL<br>3677227 | 3.279 | 3.332 |  |  |  |  |  |  |  |  |  |
| CHEMBL<br>3672421 | 3.279 | 3.050 |  |  |  |  |  |  |  |  |  |
| CHEMBL<br>3703279 | 3.281 | 2.760 |  |  |  |  |  |  |  |  |  |
| CHEMBL<br>3672443 | 3.301 | 3.225 |  |  |  |  |  |  |  |  |  |
| CHEMBL<br>3672418 | 3.301 | 3.195 |  |  |  |  |  |  |  |  |  |
| CHEMBL<br>3672402 | 3.322 | 3.040 |  |  |  |  |  |  |  |  |  |
| CHEMBL<br>3688803 | 3.322 | 3.495 |  |  |  |  |  |  |  |  |  |
| CHEMBL<br>3703297 | 3.340 | 3.128 |  |  |  |  |  |  |  |  |  |
| CHEMBL<br>3672416 | 3.342 | 3.110 |  |  |  |  |  |  |  |  |  |
| CHEMBL<br>3691383 | 3.356 | 3.393 |  |  |  |  |  |  |  |  |  |
| CHEMBL<br>3763815 | 3.358 | 3.368 |  |  |  |  |  |  |  |  |  |
| CHEMBL<br>3677222 | 3.362 | 3.677 |  |  |  |  |  |  |  |  |  |
| CHEMBL<br>3672424 | 3.362 | 3.078 |  |  |  |  |  |  |  |  |  |
| CHEMBL<br>3650757 | 3.364 | 3.076 |  |  |  |  |  |  |  |  |  |

|                   |       |       |  |  |  |  |  |  |  |  |  |
|-------------------|-------|-------|--|--|--|--|--|--|--|--|--|
| CHEMBL<br>3703251 | 3.367 | 3.107 |  |  |  |  |  |  |  |  |  |
| CHEMBL<br>3672433 | 3.380 | 2.848 |  |  |  |  |  |  |  |  |  |
| CHEMBL<br>3677234 | 3.380 | 2.838 |  |  |  |  |  |  |  |  |  |
| CHEMBL<br>3672432 | 3.415 | 3.347 |  |  |  |  |  |  |  |  |  |
| CHEMBL<br>3703294 | 3.418 | 3.162 |  |  |  |  |  |  |  |  |  |
| CHEMBL<br>3765061 | 3.430 | 3.569 |  |  |  |  |  |  |  |  |  |
| CHEMBL<br>3677238 | 3.431 | 3.296 |  |  |  |  |  |  |  |  |  |
| CHEMBL<br>3688795 | 3.438 | 3.736 |  |  |  |  |  |  |  |  |  |
| CHEMBL<br>1405147 | 3.462 | 3.004 |  |  |  |  |  |  |  |  |  |
| CHEMBL<br>3703241 | 3.462 | 3.267 |  |  |  |  |  |  |  |  |  |
| CHEMBL<br>3672431 | 3.477 | 3.288 |  |  |  |  |  |  |  |  |  |
| CHEMBL<br>3677219 | 3.491 | 3.913 |  |  |  |  |  |  |  |  |  |
| CHEMBL<br>3650767 | 3.515 | 3.238 |  |  |  |  |  |  |  |  |  |
| CHEMBL<br>3703315 | 3.530 | 3.450 |  |  |  |  |  |  |  |  |  |
| CHEMBL<br>3677229 | 3.531 | 2.739 |  |  |  |  |  |  |  |  |  |
| CHEMBL<br>3672405 | 3.531 | 3.191 |  |  |  |  |  |  |  |  |  |
| CHEMBL<br>3691365 | 3.572 | 3.719 |  |  |  |  |  |  |  |  |  |
| CHEMBL<br>3672430 | 3.602 | 3.188 |  |  |  |  |  |  |  |  |  |
| CHEMBL<br>3703221 | 3.660 | 3.829 |  |  |  |  |  |  |  |  |  |

|                   |       |       |  |  |  |  |  |  |  |  |  |
|-------------------|-------|-------|--|--|--|--|--|--|--|--|--|
| CHEMBL<br>3672717 | 3.688 | 3.862 |  |  |  |  |  |  |  |  |  |
| CHEMBL<br>3414706 | 3.708 | 3.877 |  |  |  |  |  |  |  |  |  |
| CHEMBL<br>3688688 | 3.713 | 3.574 |  |  |  |  |  |  |  |  |  |
| CHEMBL<br>3691370 | 3.728 | 3.727 |  |  |  |  |  |  |  |  |  |
| CHEMBL<br>3688672 | 3.730 | 3.142 |  |  |  |  |  |  |  |  |  |
| CHEMBL<br>3765319 | 3.781 | 3.714 |  |  |  |  |  |  |  |  |  |
| CHEMBL<br>50      | 3.813 | 3.648 |  |  |  |  |  |  |  |  |  |
| CHEMBL<br>3917763 | 3.827 | 3.461 |  |  |  |  |  |  |  |  |  |
| CHEMBL<br>3703215 | 3.858 | 3.935 |  |  |  |  |  |  |  |  |  |
| CHEMBL<br>3691363 | 3.876 | 4.205 |  |  |  |  |  |  |  |  |  |
| CHEMBL<br>3691364 | 3.900 | 3.974 |  |  |  |  |  |  |  |  |  |
| CHEMBL<br>3691379 | 3.925 | 3.524 |  |  |  |  |  |  |  |  |  |
| CHEMBL<br>3691369 | 4.009 | 3.766 |  |  |  |  |  |  |  |  |  |
| CHEMBL<br>3691366 | 4.017 | 4.389 |  |  |  |  |  |  |  |  |  |
| CHEMBL<br>3703210 | 4.068 | 3.939 |  |  |  |  |  |  |  |  |  |
| CHEMBL<br>3414705 | 4.236 | 4.182 |  |  |  |  |  |  |  |  |  |
| CHEMBL<br>3752684 | 4.256 | 4.602 |  |  |  |  |  |  |  |  |  |
| CHEMBL<br>3586138 | 4.336 | 4.446 |  |  |  |  |  |  |  |  |  |
| CHEMBL<br>3703245 | 4.394 | 4.293 |  |  |  |  |  |  |  |  |  |

|                   |        |       |                   |        |        |                   |        |       |                   |       |       |
|-------------------|--------|-------|-------------------|--------|--------|-------------------|--------|-------|-------------------|-------|-------|
| CHEMBL<br>3703240 | 4.415  | 3.843 |                   |        |        |                   |        |       |                   |       |       |
| CHEMBL<br>3703222 | 4.480  | 4.396 |                   |        |        |                   |        |       |                   |       |       |
| CHEMBL<br>3703206 | 4.775  | 4.519 |                   |        |        |                   |        |       |                   |       |       |
| <b>ANN Models</b> |        |       |                   |        |        |                   |        |       |                   |       |       |
| CHEMBL<br>3695730 | -0.301 | 0.119 | CHEMBL<br>3585777 | -1.570 | -0.507 | CHEMBL<br>362558  | -0.046 | 0.345 | CHEMBL<br>3673148 | 0.176 | 0.332 |
| CHEMBL<br>3695753 | 0.301  | 0.187 | CHEMBL<br>3585782 | -1.570 | -1.446 | CHEMBL<br>3647956 | 0.699  | 0.714 | CHEMBL<br>2333627 | 0.519 | 0.776 |
| CHEMBL<br>3910332 | 0.699  | 0.925 | CHEMBL<br>3884988 | 1.640  | 4.062  | CHEMBL<br>2048665 | 0.903  | 0.672 | CHEMBL<br>3673157 | 0.623 | 0.600 |
| CHEMBL<br>3394217 | 0.813  | 1.337 | CHEMBL<br>3410955 | 2.160  | 2.790  | CHEMBL<br>3735176 | 0.982  | 1.392 | CHEMBL<br>3673167 | 0.681 | 0.640 |
| CHEMBL<br>3964240 | 0.903  | 1.142 | CHEMBL<br>3828696 | 2.330  | 2.927  | CHEMBL<br>3091536 | 1.080  | 1.093 | CHEMBL<br>2338050 | 0.700 | 0.788 |
| CHEMBL<br>3677269 | 0.954  | 1.409 | CHEMBL<br>3819083 | 2.370  | 2.676  | CHEMBL<br>3091537 | 1.110  | 1.463 | CHEMBL<br>2333608 | 0.748 | 0.786 |
| CHEMBL<br>3977154 | 1.010  | 1.542 | CHEMBL<br>3582232 | 2.420  | 3.364  | CHEMBL<br>2386097 | 1.180  | 1.243 | CHEMBL<br>3673169 | 0.806 | 0.537 |
| CHEMBL<br>3688816 | 1.060  | 1.235 | CHEMBL<br>3753706 | 2.490  | 2.854  | CHEMBL<br>3401115 | 1.230  | 1.424 | CHEMBL<br>2333647 | 0.820 | 1.185 |
| CHEMBL<br>3683804 | 1.150  | 1.732 | CHEMBL<br>3582201 | 2.520  | 3.384  | CHEMBL<br>3401126 | 1.280  | 1.555 | CHEMBL<br>3673170 | 0.857 | 0.552 |
| CHEMBL<br>3913223 | 1.180  | 0.939 | CHEMBL<br>3818089 | 2.590  | 2.904  | CHEMBL<br>3647951 | 1.320  | 0.633 | CHEMBL<br>2333639 | 0.869 | 1.082 |
| CHEMBL<br>3673202 | 1.280  | 1.432 | CHEMBL<br>3415570 | 2.640  | 3.170  | CHEMBL<br>3091529 | 1.340  | 1.472 | CHEMBL<br>3673178 | 0.903 | 0.600 |
| CHEMBL<br>3683884 | 1.360  | 1.636 | CHEMBL<br>3582228 | 2.690  | 3.319  | CHEMBL<br>3410109 | 1.480  | 0.863 | CHEMBL<br>3681359 | 0.954 | 1.185 |
| CHEMBL<br>3937729 | 1.380  | 1.361 | CHEMBL<br>3597068 | 2.710  | 3.064  | CHEMBL<br>3735967 | 1.490  | 1.898 | CHEMBL<br>3673162 | 0.991 | 0.485 |
| CHEMBL<br>3394052 | 1.400  | 1.994 | CHEMBL<br>3415566 | 2.740  | 2.865  | CHEMBL<br>1940906 | 1.570  | 1.473 | CHEMBL<br>2337602 | 1.000 | 1.054 |
| CHEMBL<br>3683802 | 1.440  | 1.636 | CHEMBL<br>3628186 | 2.760  | 3.502  | CHEMBL<br>2386099 | 1.610  | 1.153 | CHEMBL<br>3681356 | 1.080 | 1.350 |
| CHEMBL            | 1.490  | 1.761 | CHEMBL            | 2.800  | 2.895  | CHEMBL            | 1.670  | 1.992 | CHEMBL            | 1.100 | 1.010 |

|                   |       |       |                   |       |       |                   |       |       |                   |       |       |
|-------------------|-------|-------|-------------------|-------|-------|-------------------|-------|-------|-------------------|-------|-------|
| 3688708           |       |       | 3916769           |       |       | 2048657           |       |       | 2338034           |       |       |
| CHEMBL<br>3673230 | 1.540 | 1.984 | CHEMBL<br>3828443 | 2.850 | 2.955 | CHEMBL<br>3661029 | 1.700 | 1.468 | CHEMBL<br>3703747 | 1.150 | 1.344 |
| CHEMBL<br>3969309 | 1.560 | 1.790 | CHEMBL<br>3582229 | 2.890 | 3.321 | CHEMBL<br>1809107 | 1.800 | 1.455 | CHEMBL<br>3703742 | 1.200 | 1.213 |
| CHEMBL<br>3688665 | 1.580 | 1.708 | CHEMBL<br>3819531 | 2.930 | 3.422 | CHEMBL<br>2391119 | 1.880 | 1.776 | CHEMBL<br>1852359 | 1.230 | 1.488 |
| CHEMBL<br>3688737 | 1.670 | 1.752 | CHEMBL<br>3582209 | 2.950 | 3.242 | CHEMBL<br>567958  | 1.910 | 1.696 | CHEMBL<br>1852387 | 1.280 | 1.326 |
| CHEMBL<br>3394042 | 1.690 | 1.694 | CHEMBL<br>3414597 | 2.970 | 2.887 | CHEMBL<br>3926696 | 1.930 | 1.781 | CHEMBL<br>3310489 | 1.360 | 1.595 |
| CHEMBL<br>3683879 | 1.710 | 1.664 | CHEMBL<br>3586592 | 2.980 | 3.522 | CHEMBL<br>1834119 | 2.000 | 1.415 | CHEMBL<br>2338040 | 1.400 | 1.194 |
| CHEMBL<br>3683826 | 1.750 | 2.054 | CHEMBL<br>3586600 | 3.000 | 3.526 | CHEMBL<br>1738951 | 2.100 | 2.044 | CHEMBL<br>3323093 | 1.460 | 1.389 |
| CHEMBL<br>3936217 | 1.790 | 2.232 | CHEMBL<br>3827284 | 3.020 | 2.950 | CHEMBL<br>2062563 | 2.110 | 1.575 | CHEMBL<br>2337594 | 1.500 | 1.267 |
| CHEMBL<br>3673206 | 1.830 | 1.749 | CHEMBL<br>3828281 | 3.070 | 3.098 | CHEMBL<br>1809120 | 2.200 | 1.466 | CHEMBL<br>3323097 | 1.540 | 1.095 |
| CHEMBL<br>3672718 | 1.900 | 2.734 | CHEMBL<br>3827011 | 3.110 | 3.463 | CHEMBL<br>2391128 | 2.210 | 1.345 | CHEMBL<br>3310490 | 1.590 | 1.140 |
| CHEMBL<br>3673228 | 1.920 | 2.492 | CHEMBL<br>3930722 | 3.130 | 3.183 | CHEMBL<br>2064535 | 2.270 | 1.833 | CHEMBL<br>3770651 | 1.640 | 2.237 |
| CHEMBL<br>3683858 | 1.940 | 2.237 | CHEMBL<br>3961103 | 3.180 | 3.653 | CHEMBL<br>3661030 | 2.300 | 1.790 | CHEMBL<br>1852774 | 1.710 | 1.959 |
| CHEMBL<br>3688640 | 1.960 | 1.735 | CHEMBL<br>3824239 | 3.190 | 3.393 | CHEMBL<br>2391123 | 2.370 | 2.160 | CHEMBL<br>2380972 | 1.810 | 1.671 |
| CHEMBL<br>3683808 | 1.990 | 2.382 | CHEMBL<br>481     | 3.260 | 3.363 | CHEMBL<br>3735613 | 2.410 | 1.647 | CHEMBL<br>1852777 | 1.850 | 1.674 |
| CHEMBL<br>3688664 | 2.020 | 1.838 | CHEMBL<br>3973337 | 3.300 | 3.503 | CHEMBL<br>3734985 | 2.490 | 2.566 | CHEMBL<br>3818953 | 1.930 | 1.432 |
| CHEMBL<br>3903848 | 2.060 | 2.508 | CHEMBL<br>3828028 | 3.320 | 3.472 | CHEMBL<br>1809121 | 2.500 | 1.973 | CHEMBL<br>2430681 | 2.000 | 2.079 |
| CHEMBL<br>3688620 | 2.080 | 1.518 | CHEMBL<br>3582212 | 3.380 | 3.642 | CHEMBL<br>1834113 | 2.640 | 1.909 | CHEMBL<br>3593394 | 2.080 | 2.226 |
| CHEMBL<br>3683892 | 2.100 | 2.078 | CHEMBL<br>3628059 | 3.430 | 3.846 | CHEMBL<br>3735095 | 2.720 | 2.309 | CHEMBL<br>2333622 | 2.150 | 2.582 |
| CHEMBL            | 2.120 | 1.602 | CHEMBL            | 3.480 | 3.379 | CHEMBL            | 2.760 | 2.751 | CHEMBL            | 2.210 | 1.852 |

|                   |       |       |                   |        |        |                   |       |       |                   |       |       |
|-------------------|-------|-------|-------------------|--------|--------|-------------------|-------|-------|-------------------|-------|-------|
| 3683885           |       |       | 636               |        |        | 3736418           |       |       | 3681361           |       |       |
| CHEMBL<br>3688625 | 2.150 | 2.208 | CHEMBL<br>3984034 | 3.510  | 3.738  | CHEMBL<br>1809115 | 2.800 | 1.799 | CHEMBL<br>3593275 | 2.300 | 2.389 |
| CHEMBL<br>3673205 | 2.180 | 1.803 | CHEMBL<br>3628062 | 3.520  | 3.603  | CHEMBL<br>3410098 | 2.860 | 2.923 | CHEMBL<br>3799596 | 2.450 | 2.834 |
| CHEMBL<br>3959813 | 2.200 | 2.432 | CHEMBL<br>3822890 | 3.550  | 3.435  | CHEMBL<br>3673435 | 2.930 | 2.914 | CHEMBL<br>3612835 | 2.510 | 2.707 |
| CHEMBL<br>3688609 | 2.270 | 2.747 | CHEMBL<br>3586605 | 3.590  | 3.561  | CHEMBL<br>2022421 | 2.950 | 2.451 | CHEMBL<br>3818345 | 2.580 | 2.762 |
| CHEMBL<br>3654219 | 2.300 | 2.634 | CHEMBL<br>3770206 | 3.660  | 3.774  | CHEMBL<br>2022423 | 3.040 | 2.524 | CHEMBL<br>3612825 | 2.630 | 3.113 |
| CHEMBL<br>3673217 | 2.380 | 2.967 | CHEMBL<br>577016  | 3.710  | 3.894  | CHEMBL<br>2024359 | 3.110 | 2.195 | CHEMBL<br>3126959 | 2.720 | 2.951 |
| CHEMBL<br>3683860 | 2.400 | 2.714 | CHEMBL<br>3770356 | 3.760  | 3.604  | CHEMBL<br>2022422 | 3.260 | 2.252 | CHEMBL<br>3963788 | 2.780 | 2.524 |
| CHEMBL<br>3703234 | 2.440 | 2.795 | CHEMBL<br>3586602 | 3.780  | 3.611  | CHEMBL<br>3765061 | 3.300 | 3.048 | CHEMBL<br>3126969 | 2.990 | 2.949 |
| CHEMBL<br>3688718 | 2.500 | 1.953 | CHEMBL<br>1079905 | 3.810  | 3.454  | CHEMBL<br>3763728 | 3.400 | 3.155 | CHEMBL<br>3673176 | 0.342 | 0.498 |
| CHEMBL<br>3703281 | 2.540 | 2.905 | CHEMBL<br>3764433 | 3.850  | 3.769  | CHEMBL<br>3298402 | 3.660 | 3.193 | CHEMBL<br>3673161 | 0.580 | 0.509 |
| CHEMBL<br>3703266 | 2.590 | 2.511 | CHEMBL<br>3770516 | 3.880  | 3.962  | CHEMBL<br>140     | 4.250 | 3.531 | CHEMBL<br>3673175 | 0.643 | 0.594 |
| CHEMBL<br>3764532 | 2.600 | 2.751 | CHEMBL<br>3586604 | 3.930  | 3.588  | CHEMBL<br>2048685 | 0.301 | 0.625 | CHEMBL<br>3703738 | 0.690 | 0.812 |
| CHEMBL<br>3969436 | 2.640 | 2.440 | CHEMBL<br>3628061 | 4.360  | 3.988  | CHEMBL<br>2386112 | 0.724 | 0.362 | CHEMBL<br>3673143 | 0.724 | 0.502 |
| CHEMBL<br>3746896 | 2.680 | 1.954 | CHEMBL<br>3585779 | -1.570 | -0.387 | CHEMBL<br>2048679 | 0.903 | 1.046 | CHEMBL<br>3703736 | 0.785 | 0.987 |
| CHEMBL<br>3672708 | 2.710 | 3.131 | CHEMBL<br>3585784 | -1.570 | -1.530 | CHEMBL<br>2386273 | 1.050 | 1.184 | CHEMBL<br>3323102 | 0.806 | 0.973 |
| CHEMBL<br>3693256 | 2.780 | 2.381 | CHEMBL<br>3827432 | 2.040  | 2.762  | CHEMBL<br>3401116 | 1.080 | 1.495 | CHEMBL<br>2333604 | 0.833 | 0.958 |
| CHEMBL<br>3703288 | 2.820 | 2.428 | CHEMBL<br>3754672 | 2.300  | 3.052  | CHEMBL<br>2048666 | 1.150 | 1.555 | CHEMBL<br>3673149 | 0.863 | 0.467 |
| CHEMBL<br>3747247 | 2.860 | 2.584 | CHEMBL<br>3752384 | 2.350  | 3.081  | CHEMBL<br>3401125 | 1.200 | 1.548 | CHEMBL<br>2338045 | 0.900 | 1.099 |
| CHEMBL            | 2.890 | 2.771 | CHEMBL            | 2.410  | 3.086  | CHEMBL            | 1.250 | 1.093 | CHEMBL            | 0.924 | 0.948 |

|                   |       |       |                   |       |       |                   |       |       |                   |       |       |
|-------------------|-------|-------|-------------------|-------|-------|-------------------|-------|-------|-------------------|-------|-------|
| 3650769           |       |       | 3828054           |       |       | 2386108           |       |       | 3323176           |       |       |
| CHEMBL<br>3691360 | 2.920 | 3.558 | CHEMBL<br>3415643 | 2.430 | 2.384 | CHEMBL<br>1809109 | 1.300 | 0.778 | CHEMBL<br>2333614 | 0.959 | 1.051 |
| CHEMBL<br>3650814 | 2.940 | 3.133 | CHEMBL<br>3417000 | 2.510 | 2.672 | CHEMBL<br>489422  | 1.320 | 1.055 | CHEMBL<br>3703730 | 1.000 | 1.321 |
| CHEMBL<br>3763944 | 2.990 | 2.954 | CHEMBL<br>3415575 | 2.580 | 2.441 | CHEMBL<br>3940448 | 1.380 | 1.251 | CHEMBL<br>3639720 | 1.040 | 0.835 |
| CHEMBL<br>3703301 | 3.030 | 3.385 | CHEMBL<br>3754146 | 2.620 | 2.657 | CHEMBL<br>3652547 | 1.480 | 1.200 | CHEMBL<br>2333636 | 1.080 | 1.382 |
| CHEMBL<br>3672436 | 3.080 | 3.191 | CHEMBL<br>3582225 | 2.650 | 3.501 | CHEMBL<br>3401130 | 1.540 | 1.447 | CHEMBL<br>2333605 | 1.110 | 0.824 |
| CHEMBL<br>3672425 | 3.080 | 2.863 | CHEMBL<br>3415561 | 2.700 | 3.098 | CHEMBL<br>2386103 | 1.600 | 1.231 | CHEMBL<br>1852422 | 1.200 | 1.432 |
| CHEMBL<br>3891320 | 3.110 | 3.078 | CHEMBL<br>3628184 | 2.720 | 3.495 | CHEMBL<br>3922494 | 1.650 | 1.658 | CHEMBL<br>2333607 | 1.200 | 0.669 |
| CHEMBL<br>3677218 | 3.150 | 2.375 | CHEMBL<br>3416995 | 2.760 | 2.780 | CHEMBL<br>3652544 | 1.680 | 1.366 | CHEMBL<br>3323177 | 1.260 | 0.853 |
| CHEMBL<br>3703261 | 3.170 | 2.995 | CHEMBL<br>395280  | 2.780 | 3.349 | CHEMBL<br>3950215 | 1.710 | 1.794 | CHEMBL<br>3703734 | 1.300 | 1.524 |
| CHEMBL<br>3672447 | 3.200 | 3.430 | CHEMBL<br>435071  | 2.810 | 3.389 | CHEMBL<br>1834123 | 1.810 | 2.125 | CHEMBL<br>2333641 | 1.360 | 1.373 |
| CHEMBL<br>3672406 | 3.230 | 3.744 | CHEMBL<br>3818801 | 2.880 | 3.484 | CHEMBL<br>3091530 | 1.890 | 1.412 | CHEMBL<br>3817915 | 1.430 | 1.683 |
| CHEMBL<br>3703279 | 3.280 | 3.024 | CHEMBL<br>3623555 | 2.900 | 3.320 | CHEMBL<br>3652543 | 1.920 | 1.424 | CHEMBL<br>3681357 | 1.480 | 1.649 |
| CHEMBL<br>3703297 | 3.340 | 3.391 | CHEMBL<br>3582227 | 2.940 | 3.401 | CHEMBL<br>2391120 | 1.930 | 1.703 | CHEMBL<br>2333613 | 1.510 | 1.036 |
| CHEMBL<br>3672424 | 3.360 | 3.261 | CHEMBL<br>3586199 | 2.960 | 3.160 | CHEMBL<br>1834121 | 2.040 | 1.878 | CHEMBL<br>3310485 | 1.560 | 1.265 |
| CHEMBL<br>3672432 | 3.410 | 3.494 | CHEMBL<br>3415564 | 2.970 | 2.894 | CHEMBL<br>2064539 | 2.110 | 2.055 | CHEMBL<br>3798035 | 1.600 | 1.310 |
| CHEMBL<br>1405147 | 3.460 | 3.208 | CHEMBL<br>3950130 | 2.990 | 3.453 | CHEMBL<br>2386274 | 2.170 | 1.677 | CHEMBL<br>3310484 | 1.670 | 1.225 |
| CHEMBL<br>3703315 | 3.530 | 3.622 | CHEMBL<br>3819320 | 3.000 | 3.087 | CHEMBL<br>1834316 | 2.200 | 1.608 | CHEMBL<br>3310486 | 1.760 | 1.632 |
| CHEMBL<br>3703221 | 3.660 | 3.742 | CHEMBL<br>3945423 | 3.040 | 3.076 | CHEMBL<br>355496  | 2.240 | 2.574 | CHEMBL<br>3818471 | 1.830 | 1.343 |
| CHEMBL            | 3.730 | 2.976 | CHEMBL            | 3.080 | 3.369 | CHEMBL            | 2.290 | 2.122 | CHEMBL            | 1.900 | 1.959 |



|                   |        |       |                   |       |       |                   |       |       |                   |       |       |
|-------------------|--------|-------|-------------------|-------|-------|-------------------|-------|-------|-------------------|-------|-------|
| 3688672           |        |       | 3582230           |       |       | 2391117           |       |       | 2407335           |       |       |
| CHEMBL<br>3691363 | 3.880  | 4.099 | CHEMBL<br>3402719 | 3.110 | 3.572 | CHEMBL<br>2391130 | 2.350 | 2.097 | CHEMBL<br>3323107 | 1.980 | 1.746 |
| CHEMBL<br>3703210 | 4.070  | 3.889 | CHEMBL<br>3765093 | 3.140 | 3.560 | CHEMBL<br>1940904 | 2.400 | 1.829 | CHEMBL<br>3703741 | 2.000 | 2.220 |
| CHEMBL<br>3703240 | 4.410  | 3.741 | CHEMBL<br>3586614 | 3.180 | 3.271 | CHEMBL<br>3661032 | 2.480 | 2.185 | CHEMBL<br>3126963 | 2.110 | 2.283 |
| CHEMBL<br>3695752 | -0.155 | 0.238 | CHEMBL<br>3819155 | 3.190 | 3.439 | CHEMBL<br>2064515 | 2.500 | 2.364 | CHEMBL<br>2380974 | 2.150 | 1.809 |
| CHEMBL<br>3953199 | 0.415  | 0.885 | CHEMBL<br>489354  | 3.260 | 3.183 | CHEMBL<br>3736462 | 2.540 | 2.753 | CHEMBL<br>3126977 | 2.280 | 2.903 |
| CHEMBL<br>3906568 | 0.699  | 0.953 | CHEMBL<br>3577524 | 3.300 | 3.195 | CHEMBL<br>2024372 | 2.700 | 2.079 | CHEMBL<br>3126961 | 2.320 | 2.784 |
| CHEMBL<br>3673214 | 0.875  | 0.988 | CHEMBL<br>3597006 | 3.330 | 3.461 | CHEMBL<br>3736122 | 2.750 | 2.560 | CHEMBL<br>3126967 | 2.450 | 3.004 |
| CHEMBL<br>3920257 | 0.954  | 0.731 | CHEMBL<br>3623566 | 3.400 | 3.516 | CHEMBL<br>1834110 | 2.780 | 1.946 | CHEMBL<br>3334801 | 2.530 | 2.350 |
| CHEMBL<br>3741314 | 0.978  | 0.940 | CHEMBL<br>3597060 | 3.450 | 3.401 | CHEMBL<br>3736404 | 2.830 | 2.492 | CHEMBL<br>3334799 | 2.600 | 3.066 |
| CHEMBL<br>3916731 | 1.040  | 0.864 | CHEMBL<br>3976003 | 3.500 | 3.785 | CHEMBL<br>1682842 | 2.900 | 2.775 | CHEMBL<br>3593404 | 2.680 | 2.791 |
| CHEMBL<br>3683816 | 1.110  | 1.206 | CHEMBL<br>3763609 | 3.520 | 3.643 | CHEMBL<br>1834331 | 2.950 | 1.838 | CHEMBL<br>3334798 | 2.740 | 3.130 |
| CHEMBL<br>3688819 | 1.160  | 1.516 | CHEMBL<br>3628058 | 3.530 | 3.829 | CHEMBL<br>3951486 | 3.010 | 2.665 | CHEMBL<br>3593405 | 2.830 | 2.792 |
| CHEMBL<br>3688820 | 1.230  | 1.412 | CHEMBL<br>3822559 | 3.580 | 3.427 | CHEMBL<br>2024371 | 3.080 | 2.642 | CHEMBL<br>281594  | 3.580 | 3.216 |
| CHEMBL<br>3683883 | 1.330  | 1.580 | CHEMBL<br>3765496 | 3.600 | 3.735 | CHEMBL<br>151     | 3.180 | 2.958 | CHEMBL<br>3673141 | 0.415 | 0.473 |
| CHEMBL<br>3943188 | 1.360  | 1.560 | CHEMBL<br>1262    | 3.670 | 4.065 | CHEMBL<br>3093044 | 3.280 | 2.486 | CHEMBL<br>2333626 | 0.602 | 0.670 |
| CHEMBL<br>3688736 | 1.390  | 1.889 | CHEMBL<br>653     | 3.750 | 3.607 | CHEMBL<br>3093037 | 3.320 | 2.572 | CHEMBL<br>3323183 | 0.653 | 0.766 |
| CHEMBL<br>3683833 | 1.430  | 2.035 | CHEMBL<br>1801816 | 3.770 | 3.769 | CHEMBL<br>3763815 | 3.440 | 3.105 | CHEMBL<br>2338053 | 0.700 | 0.767 |
| CHEMBL<br>3683844 | 1.470  | 1.940 | CHEMBL<br>239618  | 3.800 | 3.731 | CHEMBL<br>3765319 | 3.750 | 3.748 | CHEMBL<br>3673136 | 0.748 | 0.567 |
| CHEMBL            | 1.510  | 1.732 | CHEMBL            | 3.810 | 3.327 | CHEMBL            | 4.630 | 4.207 | CHEMBL            | 0.800 | 0.757 |

|                   |       |       |                   |        |        |                   |       |       |                   |       |       |
|-------------------|-------|-------|-------------------|--------|--------|-------------------|-------|-------|-------------------|-------|-------|
| 3688627           |       |       | 1200623           |        |        | 2334786           |       |       | 2338051           |       |       |
| CHEMBL<br>3683856 | 1.550 | 1.372 | CHEMBL<br>113     | 3.860  | 3.784  | CHEMBL<br>3647955 | 0.477 | 0.464 | CHEMBL<br>2333624 | 0.820 | 0.952 |
| CHEMBL<br>3683915 | 1.560 | 1.357 | CHEMBL<br>3824057 | 3.890  | 3.453  | CHEMBL<br>3410110 | 0.771 | 0.665 | CHEMBL<br>3323109 | 0.839 | 0.977 |
| CHEMBL<br>3683878 | 1.600 | 2.039 | CHEMBL<br>3786666 | 4.130  | 3.771  | CHEMBL<br>2048672 | 0.954 | 0.747 | CHEMBL<br>2333617 | 0.863 | 0.910 |
| CHEMBL<br>3688643 | 1.670 | 1.738 | CHEMBL<br>3628053 | 4.480  | 3.918  | CHEMBL<br>2386089 | 1.060 | 0.810 | CHEMBL<br>2337596 | 0.900 | 1.265 |
| CHEMBL<br>3683872 | 1.700 | 1.666 | CHEMBL<br>3585775 | -1.570 | 0.209  | CHEMBL<br>1809110 | 1.100 | 1.416 | CHEMBL<br>3673173 | 0.949 | 0.571 |
| CHEMBL<br>3693236 | 1.710 | 1.914 | CHEMBL<br>3585780 | -1.570 | -0.444 | CHEMBL<br>2048658 | 1.150 | 1.002 | CHEMBL<br>3673129 | 0.973 | 0.573 |
| CHEMBL<br>3673198 | 1.780 | 2.133 | CHEMBL<br>3416998 | 2.070  | 2.371  | CHEMBL<br>2046466 | 1.230 | 0.838 | CHEMBL<br>2333645 | 1.000 | 0.896 |
| CHEMBL<br>3688632 | 1.800 | 1.875 | CHEMBL<br>1677    | 2.310  | 2.826  | CHEMBL<br>3401119 | 1.280 | 1.398 | CHEMBL<br>3673130 | 1.050 | 0.537 |
| CHEMBL<br>3746261 | 1.850 | 2.082 | CHEMBL<br>3416999 | 2.350  | 2.646  | CHEMBL<br>3652541 | 1.300 | 1.016 | CHEMBL<br>2407334 | 1.080 | 1.472 |
| CHEMBL<br>3688821 | 1.910 | 1.594 | CHEMBL<br>3415573 | 2.410  | 2.418  | CHEMBL<br>2386095 | 1.330 | 1.251 | CHEMBL<br>2333616 | 1.150 | 1.461 |
| CHEMBL<br>3683877 | 1.920 | 1.733 | CHEMBL<br>3586577 | 2.480  | 2.419  | CHEMBL<br>2386107 | 1.400 | 0.662 | CHEMBL<br>2338035 | 1.200 | 0.945 |
| CHEMBL<br>3918935 | 1.950 | 2.487 | CHEMBL<br>3754480 | 2.510  | 2.822  | CHEMBL<br>3661031 | 1.480 | 1.588 | CHEMBL<br>1852466 | 1.230 | 1.452 |
| CHEMBL<br>3640275 | 1.970 | 1.586 | CHEMBL<br>3597057 | 2.590  | 3.307  | CHEMBL<br>2391100 | 1.540 | 1.416 | CHEMBL<br>3673165 | 1.280 | 0.591 |
| CHEMBL<br>3688722 | 2.000 | 1.810 | CHEMBL<br>3752451 | 2.630  | 2.871  | CHEMBL<br>2064536 | 1.610 | 1.636 | CHEMBL<br>3703726 | 1.330 | 1.741 |
| CHEMBL<br>3673197 | 2.030 | 2.301 | CHEMBL<br>3410957 | 2.660  | 2.794  | CHEMBL<br>1834117 | 1.650 | 1.049 | CHEMBL<br>3323089 | 1.380 | 1.533 |
| CHEMBL<br>3422244 | 2.060 | 2.241 | CHEMBL<br>3577510 | 2.700  | 3.241  | CHEMBL<br>3960209 | 1.690 | 1.706 | CHEMBL<br>3323178 | 1.450 | 0.775 |
| CHEMBL<br>3683857 | 2.080 | 2.204 | CHEMBL<br>470867  | 2.730  | 3.182  | CHEMBL<br>2391098 | 1.750 | 1.414 | CHEMBL<br>3323105 | 1.490 | 1.667 |
| CHEMBL<br>3683904 | 2.110 | 2.037 | CHEMBL<br>3415576 | 2.760  | 2.491  | CHEMBL<br>3401114 | 1.830 | 1.317 | CHEMBL<br>3593274 | 1.540 | 1.958 |
| CHEMBL            | 2.140 | 2.042 | CHEMBL            | 2.790  | 3.290  | CHEMBL            | 1.900 | 1.377 | CHEMBL            | 1.570 | 1.636 |

|                   |       |       |                   |       |       |                   |       |       |                   |       |       |
|-------------------|-------|-------|-------------------|-------|-------|-------------------|-------|-------|-------------------|-------|-------|
| 3703303           |       |       | 3764305           |       |       | 1809113           |       |       | 3310487           |       |       |
| CHEMBL<br>3683905 | 2.160 | 1.542 | CHEMBL<br>3582226 | 2.820 | 3.459 | CHEMBL<br>2391099 | 1.920 | 1.696 | CHEMBL<br>1852373 | 1.630 | 1.927 |
| CHEMBL<br>3688621 | 2.180 | 2.225 | CHEMBL<br>129837  | 2.880 | 3.272 | CHEMBL<br>3410103 | 1.950 | 1.801 | CHEMBL<br>3317694 | 1.700 | 1.655 |
| CHEMBL<br>3688659 | 2.220 | 2.667 | CHEMBL<br>3900401 | 2.910 | 3.344 | CHEMBL<br>2386275 | 2.060 | 1.726 | CHEMBL<br>3703745 | 1.790 | 1.238 |
| CHEMBL<br>3683922 | 2.280 | 2.543 | CHEMBL<br>3597061 | 2.940 | 3.512 | CHEMBL<br>2064517 | 2.110 | 2.258 | CHEMBL<br>1852361 | 1.830 | 2.049 |
| CHEMBL<br>3427246 | 2.360 | 2.650 | CHEMBL<br>3586594 | 2.960 | 3.501 | CHEMBL<br>3093052 | 2.180 | 1.823 | CHEMBL<br>1852659 | 1.920 | 2.174 |
| CHEMBL<br>3688690 | 2.390 | 2.769 | CHEMBL<br>3577508 | 2.980 | 3.288 | CHEMBL<br>1834328 | 2.200 | 1.384 | CHEMBL<br>2380979 | 1.990 | 2.154 |
| CHEMBL<br>3634338 | 2.410 | 2.431 | CHEMBL<br>3965783 | 3.000 | 2.874 | CHEMBL<br>2064531 | 2.250 | 2.475 | CHEMBL<br>3331484 | 2.060 | 1.737 |
| CHEMBL<br>3688745 | 2.460 | 2.514 | CHEMBL<br>3763203 | 3.010 | 3.698 | CHEMBL<br>3736164 | 2.300 | 2.703 | CHEMBL<br>2407332 | 2.110 | 1.851 |
| CHEMBL<br>3703255 | 2.500 | 2.710 | CHEMBL<br>3892044 | 3.050 | 3.101 | CHEMBL<br>3734956 | 2.360 | 2.862 | CHEMBL<br>2347855 | 2.180 | 2.754 |
| CHEMBL<br>3677240 | 2.570 | 3.151 | CHEMBL<br>3763778 | 3.100 | 3.626 | CHEMBL<br>3735962 | 2.400 | 2.867 | CHEMBL<br>3593392 | 2.300 | 2.366 |
| CHEMBL<br>3765050 | 2.590 | 2.974 | CHEMBL<br>1254269 | 3.120 | 3.257 | CHEMBL<br>2022413 | 2.480 | 2.597 | CHEMBL<br>3799356 | 2.430 | 2.294 |
| CHEMBL<br>3672721 | 2.610 | 3.140 | CHEMBL<br>3818992 | 3.160 | 2.886 | CHEMBL<br>1809117 | 2.500 | 1.776 | CHEMBL<br>3906576 | 2.490 | 2.752 |
| CHEMBL<br>3654229 | 2.650 | 2.798 | CHEMBL<br>3818167 | 3.180 | 3.477 | CHEMBL<br>3943352 | 2.550 | 2.181 | CHEMBL<br>3334797 | 2.580 | 3.074 |
| CHEMBL<br>3693253 | 2.700 | 2.430 | CHEMBL<br>3787116 | 3.210 | 2.964 | CHEMBL<br>3735772 | 2.720 | 2.507 | CHEMBL<br>3798279 | 2.620 | 2.537 |
| CHEMBL<br>3650801 | 2.770 | 2.632 | CHEMBL<br>171048  | 3.280 | 3.415 | CHEMBL<br>3736196 | 2.750 | 2.555 | CHEMBL<br>3331504 | 2.710 | 2.716 |
| CHEMBL<br>3672414 | 2.800 | 2.746 | CHEMBL<br>3415579 | 3.300 | 3.097 | CHEMBL<br>2022418 | 2.780 | 2.955 | CHEMBL<br>2347691 | 2.760 | 2.958 |
| CHEMBL<br>3650820 | 2.820 | 2.991 | CHEMBL<br>3819646 | 3.330 | 3.528 | CHEMBL<br>3735293 | 2.840 | 2.284 | CHEMBL<br>3763998 | 2.900 | 2.615 |
| CHEMBL<br>3677226 | 2.870 | 2.617 | CHEMBL<br>2071424 | 3.420 | 3.543 | CHEMBL<br>483841  | 2.900 | 1.721 | CHEMBL<br>3673177 | 0.380 | 0.371 |
| CHEMBL            | 2.900 | 2.780 | CHEMBL            | 3.460 | 3.370 | CHEMBL            | 2.950 | 3.153 | CHEMBL            | 0.600 | 0.685 |

|                   |       |       |                   |        |        |                   |       |       |                   |       |       |
|-------------------|-------|-------|-------------------|--------|--------|-------------------|-------|-------|-------------------|-------|-------|
| 3422240           |       |       | 3926911           |        |        | 3763944           |       |       | 2338046           |       |       |
| CHEMBL<br>3677217 | 2.920 | 3.026 | CHEMBL<br>1555    | 3.510  | 3.348  | CHEMBL<br>2022420 | 3.040 | 3.158 | CHEMBL<br>3323184 | 0.643 | 0.790 |
| CHEMBL<br>3677208 | 2.960 | 3.058 | CHEMBL<br>3972214 | 3.520  | 3.793  | CHEMBL<br>3093040 | 3.110 | 2.713 | CHEMBL<br>3323182 | 0.690 | 0.764 |
| CHEMBL<br>3703220 | 3.000 | 3.452 | CHEMBL<br>3949439 | 3.540  | 3.298  | CHEMBL<br>2312290 | 3.230 | 3.025 | CHEMBL<br>3323174 | 0.724 | 0.862 |
| CHEMBL<br>3763264 | 3.030 | 2.921 | CHEMBL<br>3628063 | 3.580  | 3.653  | CHEMBL<br>50      | 3.300 | 2.954 | CHEMBL<br>2333648 | 0.799 | 1.112 |
| CHEMBL<br>3672401 | 3.080 | 3.146 | CHEMBL<br>3892118 | 3.610  | 3.705  | CHEMBL<br>3093046 | 3.340 | 2.508 | CHEMBL<br>2333625 | 0.806 | 0.500 |
| CHEMBL<br>3703239 | 3.090 | 3.476 | CHEMBL<br>3765162 | 3.690  | 3.786  | CHEMBL<br>2313853 | 3.520 | 2.658 | CHEMBL<br>3703735 | 0.839 | 1.040 |
| CHEMBL<br>3414701 | 3.140 | 3.384 | CHEMBL<br>3752227 | 3.750  | 3.332  | CHEMBL<br>219346  | 3.760 | 3.111 | CHEMBL<br>3673142 | 0.863 | 1.048 |
| CHEMBL<br>3677242 | 3.150 | 3.228 | CHEMBL<br>3763417 | 3.780  | 3.711  | CHEMBL<br>105712  | 4.700 | 3.642 | CHEMBL<br>2338031 | 0.900 | 0.988 |
| CHEMBL<br>3672411 | 3.180 | 3.275 | CHEMBL<br>3764065 | 3.800  | 3.960  | CHEMBL<br>2048659 | 0.602 | 0.715 | CHEMBL<br>3673159 | 0.934 | 0.690 |
| CHEMBL<br>3703296 | 3.210 | 3.332 | CHEMBL<br>3764900 | 3.820  | 3.706  | CHEMBL<br>2048683 | 0.845 | 1.052 | CHEMBL<br>3673160 | 0.968 | 1.113 |
| CHEMBL<br>3703300 | 3.260 | 2.850 | CHEMBL<br>394753  | 3.870  | 3.934  | CHEMBL<br>2048673 | 0.954 | 0.970 | CHEMBL<br>2333635 | 1.000 | 1.127 |
| CHEMBL<br>3672418 | 3.300 | 3.478 | CHEMBL<br>3770866 | 3.900  | 3.913  | CHEMBL<br>2048671 | 1.080 | 0.313 | CHEMBL<br>3770663 | 1.040 | 1.320 |
| CHEMBL<br>3691383 | 3.360 | 3.391 | CHEMBL<br>808     | 4.140  | 3.914  | CHEMBL<br>3410087 | 1.110 | 0.447 | CHEMBL<br>2333633 | 1.080 | 1.443 |
| CHEMBL<br>3703251 | 3.370 | 3.162 | CHEMBL<br>426113  | 5.220  | 4.602  | CHEMBL<br>3401120 | 1.150 | 1.431 | CHEMBL<br>3703733 | 1.150 | 1.520 |
| CHEMBL<br>3765061 | 3.430 | 3.669 | CHEMBL<br>3585776 | -1.570 | 0.215  | CHEMBL<br>2048664 | 1.230 | 1.013 | CHEMBL<br>2338048 | 1.200 | 0.754 |
| CHEMBL<br>3672431 | 3.480 | 3.394 | CHEMBL<br>3585781 | -1.570 | -0.633 | CHEMBL<br>2391101 | 1.280 | 1.290 | CHEMBL<br>3673139 | 1.210 | 1.174 |
| CHEMBL<br>3672405 | 3.530 | 3.346 | CHEMBL<br>3786937 | 2.120  | 2.802  | CHEMBL<br>3652550 | 1.300 | 1.437 | CHEMBL<br>2407326 | 1.260 | 1.356 |
| CHEMBL<br>3414706 | 3.710 | 3.868 | CHEMBL<br>3632988 | 2.320  | 2.834  | CHEMBL<br>3410105 | 1.340 | 1.887 | CHEMBL<br>2407325 | 1.320 | 1.364 |
| CHEMBL            | 3.810 | 4.060 | CHEMBL            | 2.360  | 2.783  | CHEMBL            | 1.430 | 1.497 | CHEMBL            | 1.370 | 1.695 |

|                   |       |       |                   |       |       |                   |       |       |                   |       |       |
|-------------------|-------|-------|-------------------|-------|-------|-------------------|-------|-------|-------------------|-------|-------|
| 50                |       |       | 3410956           |       |       | 3091547           |       |       | 3952992           |       |       |
| CHEMBL<br>3691379 | 3.920 | 3.494 | CHEMBL<br>3632987 | 2.410 | 2.827 | CHEMBL<br>3401122 | 1.480 | 1.602 | CHEMBL<br>3703749 | 1.450 | 0.998 |
| CHEMBL<br>3752684 | 4.260 | 4.493 | CHEMBL<br>3415560 | 2.480 | 3.127 | CHEMBL<br>2386105 | 1.550 | 0.999 | CHEMBL<br>3323094 | 1.490 | 1.243 |
| CHEMBL<br>3703206 | 4.780 | 4.365 | CHEMBL<br>3415565 | 2.520 | 2.871 | CHEMBL<br>3401124 | 1.610 | 1.549 | CHEMBL<br>2407331 | 1.510 | 1.543 |
| CHEMBL<br>3695744 | 0.146 | 0.455 | CHEMBL<br>3827064 | 2.590 | 2.840 | CHEMBL<br>3891139 | 1.660 | 2.322 | CHEMBL<br>2407327 | 1.570 | 1.739 |
| CHEMBL<br>3695749 | 0.447 | 0.455 | CHEMBL<br>3577517 | 2.630 | 3.225 | CHEMBL<br>1834326 | 1.690 | 1.525 | CHEMBL<br>3323096 | 1.600 | 1.053 |
| CHEMBL<br>3394212 | 0.778 | 1.343 | CHEMBL<br>3905695 | 2.690 | 3.037 | CHEMBL<br>1834329 | 1.760 | 1.366 | CHEMBL<br>3310483 | 1.670 | 1.550 |
| CHEMBL<br>3980437 | 0.903 | 1.011 | CHEMBL<br>3582206 | 2.710 | 3.327 | CHEMBL<br>3736086 | 1.850 | 1.734 | CHEMBL<br>3797621 | 1.780 | 1.880 |
| CHEMBL<br>3905872 | 0.954 | 1.176 | CHEMBL<br>3752555 | 2.740 | 2.936 | CHEMBL<br>3938281 | 1.900 | 1.573 | CHEMBL<br>3323092 | 1.830 | 1.412 |
| CHEMBL<br>3944362 | 0.987 | 0.522 | CHEMBL<br>3623561 | 2.760 | 3.276 | CHEMBL<br>2391132 | 1.920 | 1.615 | CHEMBL<br>1852472 | 1.910 | 1.642 |
| CHEMBL<br>3921481 | 1.040 | 1.145 | CHEMBL<br>3410953 | 2.790 | 2.812 | CHEMBL<br>2391129 | 1.950 | 1.678 | CHEMBL<br>3593395 | 1.990 | 2.272 |
| CHEMBL<br>3673211 | 1.150 | 1.434 | CHEMBL<br>3415581 | 2.840 | 3.072 | CHEMBL<br>1738953 | 2.100 | 1.868 | CHEMBL<br>3612833 | 2.030 | 2.679 |
| CHEMBL<br>3912215 | 1.160 | 1.114 | CHEMBL<br>416     | 2.880 | 3.279 | CHEMBL<br>3093051 | 2.110 | 2.022 | CHEMBL<br>3331505 | 2.110 | 1.939 |
| CHEMBL<br>3394054 | 1.240 | 1.648 | CHEMBL<br>3785861 | 2.930 | 3.150 | CHEMBL<br>2390958 | 2.180 | 1.407 | CHEMBL<br>3593400 | 2.180 | 2.803 |
| CHEMBL<br>3688678 | 1.340 | 1.410 | CHEMBL<br>3944652 | 2.950 | 3.428 | CHEMBL<br>2391133 | 2.210 | 1.238 | CHEMBL<br>3764774 | 2.300 | 2.197 |
| CHEMBL<br>3947671 | 1.360 | 1.515 | CHEMBL<br>3827220 | 2.960 | 3.089 | CHEMBL<br>3933780 | 2.260 | 2.347 | CHEMBL<br>3331468 | 2.430 | 2.194 |
| CHEMBL<br>3688815 | 1.400 | 1.731 | CHEMBL<br>3410952 | 2.980 | 2.823 | CHEMBL<br>3093047 | 2.300 | 2.242 | CHEMBL<br>3799795 | 2.480 | 2.571 |
| CHEMBL<br>3688636 | 1.440 | 1.571 | CHEMBL<br>227075  | 3.000 | 3.470 | CHEMBL<br>2064537 | 2.370 | 2.048 | CHEMBL<br>2407321 | 2.530 | 2.630 |
| CHEMBL<br>3427252 | 1.480 | 1.567 | CHEMBL<br>3582231 | 3.020 | 3.396 | CHEMBL<br>1940908 | 2.400 | 1.893 | CHEMBL<br>3334794 | 2.600 | 2.801 |
| CHEMBL            | 1.530 | 1.605 | CHEMBL            | 3.060 | 3.698 | CHEMBL            | 2.480 | 2.707 | CHEMBL            | 2.700 | 3.039 |

|                   |       |       |                   |       |       |                   |       |       |                   |       |       |
|-------------------|-------|-------|-------------------|-------|-------|-------------------|-------|-------|-------------------|-------|-------|
| 3688822           |       |       | 3765697           |       |       | 2022415           |       |       | 3334800           |       |       |
| CHEMBL<br>3797680 | 1.560 | 1.713 | CHEMBL<br>611941  | 3.100 | 3.466 | CHEMBL<br>1809122 | 2.500 | 1.903 | CHEMBL<br>3799481 | 2.750 | 2.629 |
| CHEMBL<br>3683919 | 1.560 | 1.269 | CHEMBL<br>19215   | 3.130 | 3.294 | CHEMBL<br>3734911 | 2.560 | 2.969 | CHEMBL<br>3126965 | 2.830 | 2.964 |
| CHEMBL<br>3798544 | 1.600 | 1.682 | CHEMBL<br>3958208 | 3.170 | 3.098 | CHEMBL<br>454662  | 2.720 | 3.082 | CHEMBL<br>3673174 | 0.322 | 0.469 |
| CHEMBL<br>3673222 | 1.670 | 1.466 | CHEMBL<br>3763820 | 3.190 | 3.626 | CHEMBL<br>3736396 | 2.760 | 2.899 | CHEMBL<br>3673152 | 0.531 | 0.662 |
| CHEMBL<br>3688824 | 1.700 | 2.007 | CHEMBL<br>2163795 | 3.230 | 3.715 | CHEMBL<br>3410102 | 2.790 | 3.000 | CHEMBL<br>3673154 | 0.633 | 0.626 |
| CHEMBL<br>3688728 | 1.720 | 1.743 | CHEMBL<br>524100  | 3.290 | 3.100 | CHEMBL<br>3408213 | 2.840 | 2.464 | CHEMBL<br>3703728 | 0.681 | 0.754 |
| CHEMBL<br>3427249 | 1.780 | 2.024 | CHEMBL<br>2071425 | 3.300 | 3.428 | CHEMBL<br>2022417 | 2.900 | 2.592 | CHEMBL<br>3673146 | 0.716 | 0.500 |
| CHEMBL<br>3673196 | 1.810 | 2.295 | CHEMBL<br>221753  | 3.350 | 3.638 | CHEMBL<br>2022419 | 2.950 | 2.075 | CHEMBL<br>3673164 | 0.771 | 0.777 |
| CHEMBL<br>3683845 | 1.860 | 1.731 | CHEMBL<br>3582210 | 3.430 | 3.490 | CHEMBL<br>2024374 | 3.040 | 3.042 | CHEMBL<br>3673150 | 0.806 | 0.532 |
| CHEMBL<br>3683917 | 1.910 | 1.407 | CHEMBL<br>496     | 3.480 | 3.783 | CHEMBL<br>3093036 | 3.110 | 2.396 | CHEMBL<br>2333610 | 0.833 | 0.946 |
| CHEMBL<br>3683881 | 1.930 | 2.124 | CHEMBL<br>3628056 | 3.510 | 3.828 | CHEMBL<br>3787112 | 3.260 | 3.269 | CHEMBL<br>3673151 | 0.857 | 0.661 |
| CHEMBL<br>3688654 | 1.950 | 2.240 | CHEMBL<br>3818332 | 3.520 | 3.292 | CHEMBL<br>2024361 | 3.300 | 3.017 | CHEMBL<br>3673138 | 0.892 | 0.652 |
| CHEMBL<br>3634124 | 1.970 | 2.189 | CHEMBL<br>3763973 | 3.550 | 3.680 | CHEMBL<br>3093038 | 3.380 | 2.480 | CHEMBL<br>2333615 | 0.919 | 0.934 |
| CHEMBL<br>3683874 | 2.000 | 1.908 | CHEMBL<br>3764679 | 3.590 | 3.718 | CHEMBL<br>2313850 | 3.600 | 2.814 | CHEMBL<br>2333642 | 0.954 | 1.018 |
| CHEMBL<br>3650826 | 2.040 | 2.029 | CHEMBL<br>3628055 | 3.620 | 3.901 | CHEMBL<br>218301  | 3.790 | 3.327 | CHEMBL<br>3673179 | 1.000 | 0.571 |
| CHEMBL<br>3688729 | 2.070 | 1.617 | CHEMBL<br>3822670 | 3.690 | 3.397 | CHEMBL<br>3410089 | 0.041 | 0.633 | CHEMBL<br>2337605 | 1.000 | 1.044 |
| CHEMBL<br>3688709 | 2.090 | 2.131 | CHEMBL<br>3628060 | 3.760 | 3.845 | CHEMBL<br>2386106 | 0.724 | 0.772 | CHEMBL<br>3681366 | 1.080 | 1.237 |
| CHEMBL<br>3650831 | 2.110 | 2.191 | CHEMBL<br>3763832 | 3.780 | 3.791 | CHEMBL<br>3647954 | 0.903 | 0.484 | CHEMBL<br>2337591 | 1.100 | 0.925 |
| CHEMBL            | 2.140 | 2.325 | CHEMBL            | 3.810 | 3.888 | CHEMBL            | 1.000 | 0.469 | CHEMBL            | 1.180 | 1.411 |

|                   |       |       |                   |        |        |                   |       |       |                   |       |       |
|-------------------|-------|-------|-------------------|--------|--------|-------------------|-------|-------|-------------------|-------|-------|
| 3650849           |       |       | 3957099           |        |        | 2048669           |       |       | 3681358           |       |       |
| CHEMBL<br>3693229 | 2.160 | 1.650 | CHEMBL<br>3764488 | 3.830  | 3.882  | CHEMBL<br>2048661 | 1.080 | 0.564 | CHEMBL<br>1852617 | 1.200 | 1.248 |
| CHEMBL<br>3703233 | 2.190 | 2.357 | CHEMBL<br>305660  | 3.870  | 3.508  | CHEMBL<br>3652540 | 1.110 | 1.546 | CHEMBL<br>3769872 | 1.260 | 1.415 |
| CHEMBL<br>3654216 | 2.260 | 2.676 | CHEMBL<br>239400  | 3.900  | 3.976  | CHEMBL<br>3647950 | 1.200 | 1.021 | CHEMBL<br>2337598 | 1.300 | 0.805 |
| CHEMBL<br>3683898 | 2.290 | 2.572 | CHEMBL<br>91      | 4.270  | 3.956  | CHEMBL<br>2391102 | 1.230 | 1.225 | CHEMBL<br>3331479 | 1.360 | 1.232 |
| CHEMBL<br>3586197 | 2.360 | 2.995 | CHEMBL<br>3585778 | -1.570 | -0.232 | CHEMBL<br>2386102 | 1.300 | 1.137 | CHEMBL<br>3703729 | 1.410 | 0.854 |
| CHEMBL<br>3650822 | 2.390 | 2.131 | CHEMBL<br>3585783 | -1.570 | -1.521 | CHEMBL<br>3736035 | 1.320 | 1.355 | CHEMBL<br>3703740 | 1.470 | 1.123 |
| CHEMBL<br>3654221 | 2.410 | 2.850 | CHEMBL<br>603622  | 1.650  | 1.893  | CHEMBL<br>3401121 | 1.360 | 1.410 | CHEMBL<br>3323106 | 1.510 | 1.582 |
| CHEMBL<br>3688716 | 2.480 | 2.478 | CHEMBL<br>3632990 | 2.180  | 2.761  | CHEMBL<br>3647952 | 1.480 | 1.107 | CHEMBL<br>3593396 | 1.560 | 2.268 |
| CHEMBL<br>3673191 | 2.510 | 2.613 | CHEMBL<br>3586207 | 2.340  | 3.033  | CHEMBL<br>1834324 | 1.490 | 1.258 | CHEMBL<br>3703750 | 1.590 | 2.155 |
| CHEMBL<br>3673201 | 2.580 | 2.275 | CHEMBL<br>3577522 | 2.400  | 3.212  | CHEMBL<br>3410088 | 1.570 | 0.669 | CHEMBL<br>3331498 | 1.650 | 2.193 |
| CHEMBL<br>3654228 | 2.590 | 2.685 | CHEMBL<br>3415568 | 2.430  | 2.870  | CHEMBL<br>2048667 | 1.640 | 0.814 | CHEMBL<br>3703725 | 1.730 | 1.575 |
| CHEMBL<br>3673227 | 2.620 | 3.139 | CHEMBL<br>3819231 | 2.510  | 2.657  | CHEMBL<br>1801633 | 1.670 | 0.950 | CHEMBL<br>1852516 | 1.820 | 1.618 |
| CHEMBL<br>3654230 | 2.670 | 2.882 | CHEMBL<br>3819383 | 2.530  | 2.621  | CHEMBL<br>3091546 | 1.710 | 1.813 | CHEMBL<br>3310478 | 1.860 | 1.485 |
| CHEMBL<br>3890737 | 2.710 | 2.374 | CHEMBL<br>85251   | 2.610  | 2.603  | CHEMBL<br>3736223 | 1.810 | 2.295 | CHEMBL<br>2430680 | 1.930 | 1.737 |
| CHEMBL<br>3422239 | 2.780 | 2.890 | CHEMBL<br>3586583 | 2.640  | 3.329  | CHEMBL<br>1834325 | 1.880 | 1.418 | CHEMBL<br>3331507 | 2.000 | 1.707 |
| CHEMBL<br>3650768 | 2.800 | 2.699 | CHEMBL<br>3582224 | 2.700  | 3.381  | CHEMBL<br>2386104 | 1.920 | 1.195 | CHEMBL<br>2407330 | 2.080 | 1.778 |
| CHEMBL<br>3747444 | 2.830 | 1.578 | CHEMBL<br>3818689 | 2.720  | 2.940  | CHEMBL<br>2064518 | 1.930 | 2.181 | CHEMBL<br>2347692 | 2.150 | 2.523 |
| CHEMBL<br>3703290 | 2.870 | 2.607 | CHEMBL<br>3597056 | 2.740  | 3.172  | CHEMBL<br>1809118 | 2.000 | 1.883 | CHEMBL<br>2347856 | 2.230 | 2.818 |
| CHEMBL            | 2.910 | 3.253 | CHEMBL            | 2.770  | 3.084  | CHEMBL            | 2.100 | 1.942 | CHEMBL            | 2.310 | 2.236 |

|                   |       |       |                   |       |       |                   |       |       |                   |       |       |
|-------------------|-------|-------|-------------------|-------|-------|-------------------|-------|-------|-------------------|-------|-------|
| 3672410           |       |       | 3623553           |       |       | 2391126           |       |       | 1201066           |       |       |
| CHEMBL<br>3650798 | 2.940 | 2.955 | CHEMBL<br>3415580 | 2.810 | 3.078 | CHEMBL<br>3699443 | 2.130 | 1.037 | CHEMBL<br>3799668 | 2.450 | 2.350 |
| CHEMBL<br>3650790 | 2.970 | 2.867 | CHEMBL<br>3818512 | 2.880 | 3.043 | CHEMBL<br>1738952 | 2.200 | 1.307 | CHEMBL<br>3593391 | 2.520 | 2.345 |
| CHEMBL<br>3764465 | 3.020 | 3.137 | CHEMBL<br>3586576 | 2.900 | 3.363 | CHEMBL<br>2064519 | 2.220 | 1.790 | CHEMBL<br>3334776 | 2.590 | 2.982 |
| CHEMBL<br>3672419 | 3.040 | 2.937 | CHEMBL<br>3921061 | 2.940 | 3.395 | CHEMBL<br>1834120 | 2.280 | 1.402 | CHEMBL<br>3334793 | 2.650 | 2.622 |
| CHEMBL<br>3677228 | 3.080 | 3.354 | CHEMBL<br>3577520 | 2.950 | 3.220 | CHEMBL<br>3652546 | 2.300 | 1.830 | CHEMBL<br>3126972 | 2.720 | 2.607 |
| CHEMBL<br>3650775 | 3.100 | 3.096 | CHEMBL<br>3764100 | 2.970 | 3.642 | CHEMBL<br>3410099 | 2.380 | 2.287 | CHEMBL<br>2347695 | 2.820 | 2.733 |
| CHEMBL<br>3672439 | 3.150 | 3.126 | CHEMBL<br>3910830 | 2.990 | 3.189 | CHEMBL<br>1834115 | 2.460 | 1.973 | CHEMBL<br>2347703 | 2.990 | 2.951 |
| CHEMBL<br>3650813 | 3.160 | 3.251 | CHEMBL<br>3586574 | 3.000 | 3.380 | CHEMBL<br>3647953 | 2.490 | 2.067 |                   |       |       |
| CHEMBL<br>3703209 | 3.190 | 2.969 | CHEMBL<br>3763232 | 3.030 | 3.476 | CHEMBL<br>3735529 | 2.520 | 1.761 |                   |       |       |
| CHEMBL<br>3928706 | 3.220 | 3.102 | CHEMBL<br>3402718 | 3.080 | 3.589 | CHEMBL<br>3093042 | 2.700 | 2.564 |                   |       |       |
| CHEMBL<br>3677227 | 3.280 | 3.666 | CHEMBL<br>3628065 | 3.110 | 3.492 | CHEMBL<br>3735445 | 2.730 | 2.908 |                   |       |       |
| CHEMBL<br>3672402 | 3.320 | 3.168 | CHEMBL<br>3577509 | 3.130 | 3.285 | CHEMBL<br>1801635 | 2.760 | 2.841 |                   |       |       |
| CHEMBL<br>3763815 | 3.360 | 3.464 | CHEMBL<br>3818230 | 3.180 | 3.534 | CHEMBL<br>3735755 | 2.810 | 2.987 |                   |       |       |
| CHEMBL<br>3672433 | 3.380 | 3.031 | CHEMBL<br>3818415 | 3.190 | 3.439 | CHEMBL<br>3901767 | 2.880 | 2.845 |                   |       |       |
| CHEMBL<br>3677238 | 3.430 | 3.538 | CHEMBL<br>3402708 | 3.260 | 3.563 | CHEMBL<br>3735497 | 2.940 | 2.579 |                   |       |       |
| CHEMBL<br>3677219 | 3.490 | 4.083 | CHEMBL<br>3402713 | 3.300 | 3.488 | CHEMBL<br>3673434 | 2.960 | 3.009 |                   |       |       |
| CHEMBL<br>3691365 | 3.570 | 3.665 | CHEMBL<br>3415559 | 3.320 | 3.137 | CHEMBL<br>3735382 | 3.080 | 2.852 |                   |       |       |
| CHEMBL<br>3688688 | 3.710 | 3.456 | CHEMBL<br>3632852 | 3.400 | 3.184 | CHEMBL<br>3911190 | 3.160 | 2.507 |                   |       |       |
| CHEMBL            | 3.830 | 3.539 | CHEMBL            | 3.440 | 3.362 | CHEMBL            | 3.280 | 3.328 |                   |       |       |



|                   |       |       |                   |       |       |                   |       |       |  |  |  |
|-------------------|-------|-------|-------------------|-------|-------|-------------------|-------|-------|--|--|--|
| 3917763           |       |       | 334255            |       |       | 28                |       |       |  |  |  |
| CHEMBL<br>3691369 | 4.010 | 3.833 | CHEMBL<br>145361  | 3.490 | 3.397 | CHEMBL<br>3763318 | 3.320 | 3.183 |  |  |  |
| CHEMBL<br>3586138 | 4.340 | 4.134 | CHEMBL<br>3765569 | 3.510 | 3.773 | CHEMBL<br>464381  | 3.410 | 2.812 |  |  |  |
| CHEMBL<br>3695747 | 0.146 | 0.540 | CHEMBL<br>3765476 | 3.530 | 3.706 | CHEMBL<br>102953  | 3.700 | 3.542 |  |  |  |
| CHEMBL<br>3985433 | 0.699 | 0.542 | CHEMBL<br>3763482 | 3.570 | 3.690 | CHEMBL<br>1668411 | 4.260 | 3.781 |  |  |  |
| CHEMBL<br>3971416 | 0.799 | 1.374 | CHEMBL<br>3628057 | 3.590 | 3.830 |                   |       |       |  |  |  |
| CHEMBL<br>3897568 | 0.903 | 1.051 | CHEMBL<br>3823464 | 3.670 | 3.403 |                   |       |       |  |  |  |
| CHEMBL<br>3957841 | 0.954 | 1.012 | CHEMBL<br>3623565 | 3.720 | 3.463 |                   |       |       |  |  |  |
| CHEMBL<br>3980315 | 1.000 | 1.115 | CHEMBL<br>64894   | 3.770 | 3.777 |                   |       |       |  |  |  |
| CHEMBL<br>3896933 | 1.040 | 1.128 | CHEMBL<br>1327885 | 3.790 | 3.734 |                   |       |       |  |  |  |
| CHEMBL<br>3896538 | 1.150 | 1.316 | CHEMBL<br>3770071 | 3.810 | 3.665 |                   |       |       |  |  |  |
| CHEMBL<br>3973523 | 1.160 | 1.394 | CHEMBL<br>240047  | 3.850 | 3.871 |                   |       |       |  |  |  |
| CHEMBL<br>3688652 | 1.260 | 1.764 | CHEMBL<br>3764714 | 3.890 | 3.627 |                   |       |       |  |  |  |
| CHEMBL<br>3427250 | 1.340 | 1.683 | CHEMBL<br>1801815 | 4.000 | 4.013 |                   |       |       |  |  |  |
| CHEMBL<br>3683920 | 1.370 | 1.341 | CHEMBL<br>3628054 | 4.460 | 3.853 |                   |       |       |  |  |  |
| CHEMBL<br>3688812 | 1.400 | 1.262 |                   |       |       |                   |       |       |  |  |  |
| CHEMBL<br>3683866 | 1.440 | 1.906 |                   |       |       |                   |       |       |  |  |  |
| CHEMBL<br>3804970 | 1.490 | 1.215 |                   |       |       |                   |       |       |  |  |  |
| CHEMBL<br>3634126 | 1.530 | 1.980 |                   |       |       |                   |       |       |  |  |  |
| CHEMBL            | 1.560 | 0.887 |                   |       |       |                   |       |       |  |  |  |

|                   |       |       |  |  |  |  |  |  |  |  |  |  |
|-------------------|-------|-------|--|--|--|--|--|--|--|--|--|--|
| 3673204           |       |       |  |  |  |  |  |  |  |  |  |  |
| CHEMBL<br>3980733 | 1.570 | 2.065 |  |  |  |  |  |  |  |  |  |  |
| CHEMBL<br>3688619 | 1.600 | 1.903 |  |  |  |  |  |  |  |  |  |  |
| CHEMBL<br>3693230 | 1.680 | 1.507 |  |  |  |  |  |  |  |  |  |  |
| CHEMBL<br>3683847 | 1.700 | 1.570 |  |  |  |  |  |  |  |  |  |  |
| CHEMBL<br>3683805 | 1.740 | 1.567 |  |  |  |  |  |  |  |  |  |  |
| CHEMBL<br>3688617 | 1.790 | 1.805 |  |  |  |  |  |  |  |  |  |  |
| CHEMBL<br>3673231 | 1.810 | 2.489 |  |  |  |  |  |  |  |  |  |  |
| CHEMBL<br>3673226 | 1.870 | 2.647 |  |  |  |  |  |  |  |  |  |  |
| CHEMBL<br>3673203 | 1.910 | 1.861 |  |  |  |  |  |  |  |  |  |  |
| CHEMBL<br>3683916 | 1.940 | 1.425 |  |  |  |  |  |  |  |  |  |  |
| CHEMBL<br>3688719 | 1.960 | 2.258 |  |  |  |  |  |  |  |  |  |  |
| CHEMBL<br>3688695 | 1.970 | 1.855 |  |  |  |  |  |  |  |  |  |  |
| CHEMBL<br>3688615 | 2.000 | 2.104 |  |  |  |  |  |  |  |  |  |  |
| CHEMBL<br>3427253 | 2.040 | 2.355 |  |  |  |  |  |  |  |  |  |  |
| CHEMBL<br>3683789 | 2.070 | 1.978 |  |  |  |  |  |  |  |  |  |  |
| CHEMBL<br>3688626 | 2.090 | 2.128 |  |  |  |  |  |  |  |  |  |  |
| CHEMBL<br>3693228 | 2.110 | 1.671 |  |  |  |  |  |  |  |  |  |  |
| CHEMBL<br>3688724 | 2.150 | 1.673 |  |  |  |  |  |  |  |  |  |  |
| CHEMBL            | 2.160 | 2.263 |  |  |  |  |  |  |  |  |  |  |

|                   |       |       |  |  |  |  |  |  |  |  |  |
|-------------------|-------|-------|--|--|--|--|--|--|--|--|--|
| 3688635           |       |       |  |  |  |  |  |  |  |  |  |
| CHEMBL<br>3910646 | 2.200 | 2.047 |  |  |  |  |  |  |  |  |  |
| CHEMBL<br>3688721 | 2.260 | 2.009 |  |  |  |  |  |  |  |  |  |
| CHEMBL<br>3688707 | 2.290 | 2.158 |  |  |  |  |  |  |  |  |  |
| CHEMBL<br>3683903 | 2.380 | 2.167 |  |  |  |  |  |  |  |  |  |
| CHEMBL<br>3984088 | 2.400 | 2.227 |  |  |  |  |  |  |  |  |  |
| CHEMBL<br>3688717 | 2.430 | 2.168 |  |  |  |  |  |  |  |  |  |
| CHEMBL<br>3654215 | 2.480 | 3.063 |  |  |  |  |  |  |  |  |  |
| CHEMBL<br>3688747 | 2.530 | 2.635 |  |  |  |  |  |  |  |  |  |
| CHEMBL<br>3650833 | 2.590 | 2.614 |  |  |  |  |  |  |  |  |  |
| CHEMBL<br>3693239 | 2.600 | 2.753 |  |  |  |  |  |  |  |  |  |
| CHEMBL<br>3752926 | 2.630 | 2.535 |  |  |  |  |  |  |  |  |  |
| CHEMBL<br>3654218 | 2.670 | 2.396 |  |  |  |  |  |  |  |  |  |
| CHEMBL<br>3422235 | 2.710 | 3.064 |  |  |  |  |  |  |  |  |  |
| CHEMBL<br>3900541 | 2.780 | 2.471 |  |  |  |  |  |  |  |  |  |
| CHEMBL<br>3747445 | 2.810 | 1.885 |  |  |  |  |  |  |  |  |  |
| CHEMBL<br>3747381 | 2.860 | 1.662 |  |  |  |  |  |  |  |  |  |
| CHEMBL<br>3650782 | 2.880 | 3.048 |  |  |  |  |  |  |  |  |  |
| CHEMBL<br>3688668 | 2.910 | 2.878 |  |  |  |  |  |  |  |  |  |
| CHEMBL            | 2.940 | 2.825 |  |  |  |  |  |  |  |  |  |

|                   |       |       |  |  |  |  |  |  |  |  |  |
|-------------------|-------|-------|--|--|--|--|--|--|--|--|--|
| 3688611           |       |       |  |  |  |  |  |  |  |  |  |
| CHEMBL<br>3650777 | 2.970 | 3.006 |  |  |  |  |  |  |  |  |  |
| CHEMBL<br>3703236 | 3.030 | 2.877 |  |  |  |  |  |  |  |  |  |
| CHEMBL<br>3672442 | 3.080 | 2.465 |  |  |  |  |  |  |  |  |  |
| CHEMBL<br>3672426 | 3.080 | 3.406 |  |  |  |  |  |  |  |  |  |
| CHEMBL<br>3672417 | 3.110 | 3.122 |  |  |  |  |  |  |  |  |  |
| CHEMBL<br>3672404 | 3.150 | 3.369 |  |  |  |  |  |  |  |  |  |
| CHEMBL<br>3703259 | 3.170 | 3.038 |  |  |  |  |  |  |  |  |  |
| CHEMBL<br>3672407 | 3.200 | 3.384 |  |  |  |  |  |  |  |  |  |
| CHEMBL<br>3650770 | 3.220 | 3.124 |  |  |  |  |  |  |  |  |  |
| CHEMBL<br>3672421 | 3.280 | 3.247 |  |  |  |  |  |  |  |  |  |
| CHEMBL<br>3688803 | 3.320 | 3.359 |  |  |  |  |  |  |  |  |  |
| CHEMBL<br>3677222 | 3.360 | 3.987 |  |  |  |  |  |  |  |  |  |
| CHEMBL<br>3677234 | 3.380 | 2.970 |  |  |  |  |  |  |  |  |  |
| CHEMBL<br>3688795 | 3.440 | 3.551 |  |  |  |  |  |  |  |  |  |
| CHEMBL<br>3650767 | 3.510 | 3.269 |  |  |  |  |  |  |  |  |  |
| CHEMBL<br>3672430 | 3.600 | 3.343 |  |  |  |  |  |  |  |  |  |
| CHEMBL<br>3691370 | 3.730 | 3.693 |  |  |  |  |  |  |  |  |  |
| CHEMBL<br>3703215 | 3.860 | 3.878 |  |  |  |  |  |  |  |  |  |
| CHEMBL            | 4.020 | 4.217 |  |  |  |  |  |  |  |  |  |

|                   |        |       |  |  |  |  |  |  |  |  |  |
|-------------------|--------|-------|--|--|--|--|--|--|--|--|--|
| 3691366           |        |       |  |  |  |  |  |  |  |  |  |
| CHEMBL<br>3703245 | 4.390  | 4.241 |  |  |  |  |  |  |  |  |  |
| CHEMBL<br>3695751 | -0.222 | 0.236 |  |  |  |  |  |  |  |  |  |
| CHEMBL<br>3639946 | 0.380  | 0.540 |  |  |  |  |  |  |  |  |  |
| CHEMBL<br>3960603 | 0.699  | 1.062 |  |  |  |  |  |  |  |  |  |
| CHEMBL<br>3394040 | 0.869  | 1.016 |  |  |  |  |  |  |  |  |  |
| CHEMBL<br>3892262 | 0.954  | 0.664 |  |  |  |  |  |  |  |  |  |
| CHEMBL<br>3695738 | 0.968  | 0.503 |  |  |  |  |  |  |  |  |  |
| CHEMBL<br>3905497 | 1.030  | 1.341 |  |  |  |  |  |  |  |  |  |
| CHEMBL<br>3891061 | 1.080  | 0.923 |  |  |  |  |  |  |  |  |  |
| CHEMBL<br>3394045 | 1.160  | 1.546 |  |  |  |  |  |  |  |  |  |
| CHEMBL<br>3688660 | 1.210  | 1.504 |  |  |  |  |  |  |  |  |  |
| CHEMBL<br>3683911 | 1.280  | 1.423 |  |  |  |  |  |  |  |  |  |
| CHEMBL<br>3394228 | 1.360  | 1.496 |  |  |  |  |  |  |  |  |  |
| CHEMBL<br>3695734 | 1.390  | 1.155 |  |  |  |  |  |  |  |  |  |
| CHEMBL<br>3394215 | 1.410  | 1.673 |  |  |  |  |  |  |  |  |  |
| CHEMBL<br>3688738 | 1.460  | 1.503 |  |  |  |  |  |  |  |  |  |
| CHEMBL<br>3683843 | 1.510  | 1.544 |  |  |  |  |  |  |  |  |  |
| CHEMBL<br>3639876 | 1.550  | 1.904 |  |  |  |  |  |  |  |  |  |
| CHEMBL            | 1.560  | 1.572 |  |  |  |  |  |  |  |  |  |

|                   |       |       |  |  |  |  |  |  |  |  |  |
|-------------------|-------|-------|--|--|--|--|--|--|--|--|--|
| 3683889           |       |       |  |  |  |  |  |  |  |  |  |
| CHEMBL<br>3688813 | 1.590 | 1.508 |  |  |  |  |  |  |  |  |  |
| CHEMBL<br>3688656 | 1.670 | 2.008 |  |  |  |  |  |  |  |  |  |
| CHEMBL<br>3746637 | 1.700 | 2.135 |  |  |  |  |  |  |  |  |  |
| CHEMBL<br>3798199 | 1.710 | 2.127 |  |  |  |  |  |  |  |  |  |
| CHEMBL<br>3640259 | 1.760 | 2.226 |  |  |  |  |  |  |  |  |  |
| CHEMBL<br>3683811 | 1.800 | 1.774 |  |  |  |  |  |  |  |  |  |
| CHEMBL<br>3427247 | 1.850 | 2.323 |  |  |  |  |  |  |  |  |  |
| CHEMBL<br>3683876 | 1.910 | 1.926 |  |  |  |  |  |  |  |  |  |
| CHEMBL<br>3683873 | 1.920 | 1.996 |  |  |  |  |  |  |  |  |  |
| CHEMBL<br>3933659 | 1.950 | 2.320 |  |  |  |  |  |  |  |  |  |
| CHEMBL<br>3688612 | 1.960 | 1.999 |  |  |  |  |  |  |  |  |  |
| CHEMBL<br>3683855 | 1.990 | 1.806 |  |  |  |  |  |  |  |  |  |
| CHEMBL<br>3688616 | 2.030 | 2.162 |  |  |  |  |  |  |  |  |  |
| CHEMBL<br>3693233 | 2.060 | 1.895 |  |  |  |  |  |  |  |  |  |
| CHEMBL<br>3747766 | 2.080 | 2.073 |  |  |  |  |  |  |  |  |  |
| CHEMBL<br>3688663 | 2.100 | 2.673 |  |  |  |  |  |  |  |  |  |
| CHEMBL<br>3683801 | 2.130 | 1.997 |  |  |  |  |  |  |  |  |  |
| CHEMBL<br>3703285 | 2.160 | 1.658 |  |  |  |  |  |  |  |  |  |
| CHEMBL            | 2.180 | 2.596 |  |  |  |  |  |  |  |  |  |

|                   |       |       |  |  |  |  |  |  |  |  |  |
|-------------------|-------|-------|--|--|--|--|--|--|--|--|--|
| 3960008           |       |       |  |  |  |  |  |  |  |  |  |
| CHEMBL<br>3654232 | 2.210 | 2.717 |  |  |  |  |  |  |  |  |  |
| CHEMBL<br>3683882 | 2.270 | 1.774 |  |  |  |  |  |  |  |  |  |
| CHEMBL<br>3986498 | 2.360 | 2.157 |  |  |  |  |  |  |  |  |  |
| CHEMBL<br>3688752 | 2.380 | 2.886 |  |  |  |  |  |  |  |  |  |
| CHEMBL<br>3693257 | 2.400 | 2.381 |  |  |  |  |  |  |  |  |  |
| CHEMBL<br>3688662 | 2.450 | 1.996 |  |  |  |  |  |  |  |  |  |
| CHEMBL<br>3654223 | 2.500 | 2.833 |  |  |  |  |  |  |  |  |  |
| CHEMBL<br>3650825 | 2.540 | 2.549 |  |  |  |  |  |  |  |  |  |
| CHEMBL<br>3650772 | 2.590 | 2.994 |  |  |  |  |  |  |  |  |  |
| CHEMBL<br>3650774 | 2.600 | 3.054 |  |  |  |  |  |  |  |  |  |
| CHEMBL<br>3654226 | 2.640 | 2.992 |  |  |  |  |  |  |  |  |  |
| CHEMBL<br>3677236 | 2.680 | 2.914 |  |  |  |  |  |  |  |  |  |
| CHEMBL<br>3688691 | 2.720 | 2.660 |  |  |  |  |  |  |  |  |  |
| CHEMBL<br>3677231 | 2.790 | 2.601 |  |  |  |  |  |  |  |  |  |
| CHEMBL<br>3745922 | 2.820 | 3.166 |  |  |  |  |  |  |  |  |  |
| CHEMBL<br>3765711 | 2.860 | 3.091 |  |  |  |  |  |  |  |  |  |
| CHEMBL<br>3672413 | 2.900 | 2.720 |  |  |  |  |  |  |  |  |  |
| CHEMBL<br>3703272 | 2.920 | 2.839 |  |  |  |  |  |  |  |  |  |
| CHEMBL            | 2.960 | 3.278 |  |  |  |  |  |  |  |  |  |

|                   |       |       |  |  |  |  |  |  |  |  |  |  |
|-------------------|-------|-------|--|--|--|--|--|--|--|--|--|--|
| 3691362           |       |       |  |  |  |  |  |  |  |  |  |  |
| CHEMBL<br>3650807 | 3.000 | 2.742 |  |  |  |  |  |  |  |  |  |  |
| CHEMBL<br>3650795 | 3.030 | 2.898 |  |  |  |  |  |  |  |  |  |  |
| CHEMBL<br>3672408 | 3.080 | 3.111 |  |  |  |  |  |  |  |  |  |  |
| CHEMBL<br>3691376 | 3.090 | 3.335 |  |  |  |  |  |  |  |  |  |  |
| CHEMBL<br>3752467 | 3.130 | 3.120 |  |  |  |  |  |  |  |  |  |  |
| CHEMBL<br>3672440 | 3.150 | 3.146 |  |  |  |  |  |  |  |  |  |  |
| CHEMBL<br>3677220 | 3.180 | 3.343 |  |  |  |  |  |  |  |  |  |  |
| CHEMBL<br>3672415 | 3.200 | 3.583 |  |  |  |  |  |  |  |  |  |  |
| CHEMBL<br>3677244 | 3.230 | 3.122 |  |  |  |  |  |  |  |  |  |  |
| CHEMBL<br>3672443 | 3.300 | 3.597 |  |  |  |  |  |  |  |  |  |  |
| CHEMBL<br>3672416 | 3.340 | 3.346 |  |  |  |  |  |  |  |  |  |  |
| CHEMBL<br>3650757 | 3.360 | 3.286 |  |  |  |  |  |  |  |  |  |  |
| CHEMBL<br>3703294 | 3.420 | 3.487 |  |  |  |  |  |  |  |  |  |  |
| CHEMBL<br>3703241 | 3.460 | 3.607 |  |  |  |  |  |  |  |  |  |  |
| CHEMBL<br>3677229 | 3.530 | 2.992 |  |  |  |  |  |  |  |  |  |  |
| CHEMBL<br>3672717 | 3.690 | 3.945 |  |  |  |  |  |  |  |  |  |  |
| CHEMBL<br>3765319 | 3.780 | 3.536 |  |  |  |  |  |  |  |  |  |  |
| CHEMBL<br>3691364 | 3.900 | 3.940 |  |  |  |  |  |  |  |  |  |  |
| CHEMBL            | 4.240 | 4.148 |  |  |  |  |  |  |  |  |  |  |



|                   |       |       |  |  |  |  |  |  |  |  |  |  |
|-------------------|-------|-------|--|--|--|--|--|--|--|--|--|--|
| 3414705           |       |       |  |  |  |  |  |  |  |  |  |  |
| CHEMBL<br>3703222 | 4.480 | 4.286 |  |  |  |  |  |  |  |  |  |  |

**Table S1. The results of the virtual screening with VSW module of the Schrödinger suite.**

| ZINC code    | MW <sup>1</sup> | HBD <sup>2</sup> | HBA <sup>3</sup> | NROT <sup>4</sup> | logP <sup>5</sup> | Targets                  |      |                          |      |                          |      |                          |      |
|--------------|-----------------|------------------|------------------|-------------------|-------------------|--------------------------|------|--------------------------|------|--------------------------|------|--------------------------|------|
|              |                 |                  |                  |                   |                   | AChE                     |      | BACE1                    |      | GSK3 $\beta$             |      | SERT                     |      |
|              |                 |                  |                  |                   |                   | Binding energy, kcal/mol | LE   | Binding energy, kcal/mol | LE   | Binding energy, kcal/mol | LE   | Binding energy, kcal/mol | LE   |
| ZINC323331   | 308.3           | 3                | 3                | 2                 | 2.562             | -                        | -    | -                        | -    | -12.82                   | 0.56 | -9.12                    | 0.40 |
| ZINC49169727 | 268.3           | 2                | 3                | 3                 | 0.949             | -11.07                   | 0.55 | -6.76                    | 0.34 | -                        | -    | -                        | -    |

**Table S2. The results of the virtual screening with AutoDock Vina 1.1.2.**

| ZINC code   | MW    | HBD | HBA | NROT | logP  | Solubility category <sup>6</sup> | Targets                  |      |                          |      |                          |      |                          |      |
|-------------|-------|-----|-----|------|-------|----------------------------------|--------------------------|------|--------------------------|------|--------------------------|------|--------------------------|------|
|             |       |     |     |      |       |                                  | AChE                     |      | BACE1                    |      | GSK3 $\beta$             |      | SERT                     |      |
|             |       |     |     |      |       |                                  | Binding energy, kcal/mol | LE   | Binding energy, kcal/mol | LE   | Binding energy, kcal/mol | LE   | Binding energy, kcal/mol | LE   |
| ZINC1219    | 268.2 | 2   | 3   | 0    | 2.397 | Moderate                         | -9.7                     | 0.49 | -10.0                    | 0.50 | -9.1                     | 0.46 | -9.8                     | 0.49 |
| ZINC116738  | 273.3 | 1   | 3   | 2    | 1.234 | High                             | -8.2                     | 0.41 | -9.3                     | 0.47 | -8.4                     | 0.42 | -8.7                     | 0.44 |
| ZINC1034491 | 279.3 | 1   | 3   | 1    | 2.778 | Moderate                         | -9.8                     | 0.47 | -10.0                    | 0.48 | -8.7                     | 0.41 | -10.3                    | 0.49 |
| ZINC1763229 | 270.2 | 2   | 3   | 1    | 1.177 | High                             | -9.2                     | 0.46 | -8.9                     | 0.45 | -8.0                     | 0.40 | -8.9                     | 0.44 |
| ZINC2129833 | 301.4 | 1   | 3   | 2    | 2.112 | High                             | -9.8                     | 0.45 | -9.7                     | 0.44 | -8.9                     | 0.40 | -9.1                     | 0.41 |
| ZINC2132617 | 292.4 | 1   | 1   | 0    | 2.702 | Moderate                         | -9.2                     | 0.42 | -10.5                    | 0.48 | -9.5                     | 0.43 | -10.4                    | 0.47 |

<sup>1</sup> MW – molecular weight;

<sup>2</sup> HBD – the number of the hydrogen bonds donors;

<sup>3</sup> HBA – the number of the hydrogen bonds acceptors;

<sup>4</sup> NROT – the number of rotatable bonds;

<sup>5</sup> logP - logarithm of the octanol-water partition coefficient;

<sup>6</sup> low: if solubility is < 0.01 mg/ml; moderate: if solubility is between 0.01 and 0.06 mg/ml, high: if solubility is > 0.06 mg/ml;

| ZINC code     | MW    | HBD | HBA | NROT | logP   | Solubility category <sup>6</sup> | Targets                  |      |                          |      |                          |      |                          |      |
|---------------|-------|-----|-----|------|--------|----------------------------------|--------------------------|------|--------------------------|------|--------------------------|------|--------------------------|------|
|               |       |     |     |      |        |                                  | AChE                     |      | BACE1                    |      | GSK3 $\beta$             |      | SERT                     |      |
|               |       |     |     |      |        |                                  | Binding energy, kcal/mol | LE   | Binding energy, kcal/mol | LE   | Binding energy, kcal/mol | LE   | Binding energy, kcal/mol | LE   |
| ZINC3805477   | 284.3 | 3   | 3   | 1    | 0.533  | Moderate                         | -8.9                     | 0.42 | -9.6                     | 0.46 | -8.4                     | 0.40 | -10.1                    | 0.48 |
| ZINC3814414   | 290.4 | 2   | 2   | 0    | 2.7987 | High                             | -9.5                     | 0.45 | -10.4                    | 0.49 | -8.4                     | 0.40 | -8.8                     | 0.42 |
| ZINC3977996   | 288.4 | 3   | 3   | 0    | 2.671  | High                             | -9.2                     | 0.44 | -10.2                    | 0.49 | -9.1                     | 0.43 | -10.1                    | 0.48 |
| ZINC4028010   | 273.3 | 1   | 3   | 3    | 1.486  | Moderate                         | -9.6                     | 0.48 | -9.6                     | 0.48 | -8.7                     | 0.44 | -9.6                     | 0.48 |
| ZINC4028387   | 271.3 | 1   | 3   | 0    | 1.348  | High                             | -8.4                     | 0.42 | -9.8                     | 0.49 | -8.1                     | 0.41 | -9.5                     | 0.48 |
| ZINC4041614   | 269.3 | 1   | 2   | 0    | 0.232  | High                             | -9.1                     | 0.46 | -9.8                     | 0.49 | -8.8                     | 0.44 | -9.7                     | 0.49 |
| ZINC4082030   | 274.4 | 1   | 2   | 0    | 2.662  | High                             | -9.3                     | 0.47 | -10.3                    | 0.52 | -8.5                     | 0.43 | -8.3                     | 0.42 |
| ZINC8623851   | 268.4 | 1   | 2   | 2    | 2.981  | High                             | -8.2                     | 0.41 | -8.8                     | 0.44 | -8.0                     | 0.40 | -8.3                     | 0.42 |
| ZINC14684865  | 270.3 | 1   | 3   | 2    | 2.212  | High                             | -8.5                     | 0.43 | -9.3                     | 0.47 | -8.8                     | 0.44 | -9.0                     | 0.45 |
| ZINC35446833  | 266.3 | 1   | 3   | 2    | 2.347  | High                             | -8.8                     | 0.44 | -8.9                     | 0.45 | -8.0                     | 0.40 | -9.4                     | 0.47 |
| ZINC49169727  | 268.3 | 2   | 3   | 3    | 0.949  | High                             | -10.0                    | 0.50 | -9.1                     | 0.46 | -8.1                     | 0.41 | -8.9                     | 0.45 |
| ZINC49170581  | 275.3 | 0   | 3   | 3    | 2.217  | High                             | -9.9                     | 0.50 | -8.7                     | 0.44 | -8.0                     | 0.40 | -9.3                     | 0.47 |
| ZINC49170716  | 275.3 | 0   | 3   | 2    | 0.623  | High                             | -9.9                     | 0.50 | -8.9                     | 0.45 | -8.3                     | 0.42 | -9.2                     | 0.46 |
| ZINC49170953  | 271.3 | 0   | 3   | 2    | 1.041  | High                             | -10.3                    | 0.52 | -9.8                     | 0.49 | -8.3                     | 0.42 | -9.5                     | 0.48 |
| ZINC225482257 | 272.3 | 0   | 3   | 2    | 2.193  | High                             | -8.7                     | 0.44 | -8.0                     | 0.40 | -8.5                     | 0.43 | -8.8                     | 0.44 |
| ZINC35466008  | 280.4 | 1   | 3   | 1    | 2.536  | High                             | -8.1                     | 0.41 | -8.8                     | 0.44 | -8.1                     | 0.41 | -8.4                     | 0.42 |
| ZINC286766    | 273.3 | 0   | 3   | 1    | 3.095  | High                             | -8.6                     | 0.43 | -8.9                     | 0.45 | -8.3                     | 0.42 | -9.2                     | 0.46 |
| ZINC338038    | 270.3 | 1   | 4   | 2    | 2.635  | High                             | -9.8                     | 0.49 | -9.1                     | 0.46 | -8.3                     | 0.42 | -9.7                     | 0.49 |
| ZINC391977    | 270.2 | 3   | 5   | 1    | 2.427  | High                             | -9.4                     | 0.47 | -8.5                     | 0.43 | -8.3                     | 0.42 | -9.7                     | 0.49 |
| ZINC402720    | 314.3 | 0   | 5   | 1    | 1.572  | High                             | -9.3                     | 0.40 | -10.4                    | 0.45 | -9.4                     | 0.41 | -9.5                     | 0.41 |
| ZINC518541    | 262.4 | 1   | 1   | 2    | 3.469  | Moderate                         | -9.5                     | 0.48 | -9.6                     | 0.48 | -8.4                     | 0.42 | -10.2                    | 0.51 |
| ZINC519113    | 309.4 | 0   | 3   | 0    | 3.385  | Moderate                         | -9.7                     | 0.42 | -10.8                    | 0.47 | -9.3                     | 0.40 | -9.7                     | 0.42 |
| ZINC525976    | 284.4 | 1   | 2   | 1    | 3.214  | High                             | -9.9                     | 0.47 | -10.0                    | 0.48 | -8.7                     | 0.41 | -8.4                     | 0.40 |
| ZINC565682    | 285.4 | 2   | 3   | 1    | 3.363  | High                             | -9.3                     | 0.47 | -9.6                     | 0.48 | -8.5                     | 0.43 | -9.1                     | 0.46 |
| ZINC898768    | 272.3 | 3   | 5   | 1    | 2.185  | High                             | -10.4                    | 0.52 | -9.1                     | 0.46 | -8.3                     | 0.42 | -9.9                     | 0.50 |
| ZINC1609684   | 291.3 | 1   | 4   | 1    | 2.133  | Moderate                         | -10.2                    | 0.46 | -10.2                    | 0.46 | -8.9                     | 0.40 | -9.6                     | 0.44 |
| ZINC1801081   | 274.3 | 0   | 3   | 4    | 1.925  | Moderate                         | -9.1                     | 0.46 | -9.6                     | 0.48 | -8.1                     | 0.41 | -8.8                     | 0.44 |
| ZINC2131836   | 275.3 | 2   | 5   | 2    | 0.977  | High                             | -8.3                     | 0.42 | -9.3                     | 0.47 | -8.0                     | 0.40 | -8.5                     | 0.43 |
| ZINC3814360   | 290.4 | 1   | 2   | 0    | 3.411  | Moderate                         | -10.2                    | 0.49 | -10.7                    | 0.51 | -8.8                     | 0.42 | -9.1                     | 0.43 |
| ZINC4023561   | 284.3 | 1   | 4   | 0    | 2.15   | High                             | -9.6                     | 0.46 | -10.4                    | 0.50 | -9.2                     | 0.44 | -9.3                     | 0.44 |
| ZINC4023795   | 292.4 | 2   | 2   | 0    | 3.204  | Moderate                         | -9.2                     | 0.44 | -10.1                    | 0.48 | -8.5                     | 0.41 | -8.6                     | 0.41 |
| ZINC4025911   | 314.4 | 0   | 4   | 0    | 0.953  | Moderate                         | -10.3                    | 0.47 | -11.0                    | 0.50 | -9.3                     | 0.42 | -9.5                     | 0.43 |
| ZINC4027357   | 278.4 | 1   | 1   | 0    | 3.476  | Moderate                         | -9.3                     | 0.44 | -10.0                    | 0.48 | -8.6                     | 0.41 | -10.3                    | 0.49 |

| ZINC code     | MW    | HBD | HBA | NROT | logP    | Solubility category <sup>6</sup> | Targets                  |      |                          |      |                          |      |                          |      |
|---------------|-------|-----|-----|------|---------|----------------------------------|--------------------------|------|--------------------------|------|--------------------------|------|--------------------------|------|
|               |       |     |     |      |         |                                  | AChE                     |      | BACE1                    |      | GSK3 $\beta$             |      | SERT                     |      |
|               |       |     |     |      |         |                                  | Binding energy, kcal/mol | LE   | Binding energy, kcal/mol | LE   | Binding energy, kcal/mol | LE   | Binding energy, kcal/mol | LE   |
| ZINC4028576   | 313.4 | 0   | 4   | 1    | 2.042   | High                             | -9.4                     | 0.41 | -10.0                    | 0.43 | -9.3                     | 0.40 | -10.7                    | 0.47 |
| ZINC4038093   | 275.3 | 2   | 4   | 1    | -0.238  | High                             | -8.0                     | 0.40 | -9.2                     | 0.46 | -8.0                     | 0.40 | -8.2                     | 0.41 |
| ZINC4040762   | 292.3 | 0   | 2   | 1    | 3.145   | Moderate                         | -9.9                     | 0.45 | -10.0                    | 0.45 | -9.1                     | 0.41 | -9.8                     | 0.45 |
| ZINC4090104   | 285.3 | 2   | 4   | 3    | 1.819   | Moderate                         | -9.8                     | 0.47 | -9.6                     | 0.46 | -8.5                     | 0.40 | -9.7                     | 0.46 |
| ZINC4538008   | 288.4 | 1   | 2   | 0    | 3.365   | Moderate                         | -9.5                     | 0.45 | -10.7                    | 0.51 | -9.1                     | 0.43 | -8.7                     | 0.41 |
| ZINC4654724   | 322.3 | 2   | 5   | 0    | 2.623   | Moderate                         | -10.5                    | 0.44 | -11.1                    | 0.46 | -9.9                     | 0.41 | -9.6                     | 0.40 |
| ZINC4655109   | 272.3 | 3   | 5   | 1    | 2.728   | High                             | -9.9                     | 0.50 | -9.0                     | 0.45 | -8.2                     | 0.41 | -9.5                     | 0.48 |
| ZINC5179869   | 271.4 | 0   | 2   | 2    | 3.319   | Moderate                         | -9.4                     | 0.47 | -9.7                     | 0.49 | -8.1                     | 0.41 | -9.5                     | 0.48 |
| ZINC5733557   | 268.3 | 1   | 4   | 2    | 2.506   | Moderate                         | -9.6                     | 0.48 | -9.2                     | 0.46 | -8.2                     | 0.41 | -9.6                     | 0.48 |
| ZINC6525252   | 270.2 | 3   | 5   | 1    | 2.427   | High                             | -9.4                     | 0.47 | -9.1                     | 0.46 | -8.1                     | 0.41 | -9.1                     | 0.46 |
| ZINC14719962  | 312.3 | 2   | 4   | 0    | 1.919   | Moderate                         | -10.0                    | 0.43 | -10.4                    | 0.45 | -9.2                     | 0.40 | -10.0                    | 0.43 |
| ZINC14829817  | 276.3 | 2   | 5   | 1    | 2.167   | High                             | -9.5                     | 0.48 | -9.0                     | 0.45 | -8.3                     | 0.42 | -8.3                     | 0.42 |
| ZINC31158814  | 310.3 | 3   | 4   | 0    | 2.68114 | Moderate                         | -11.1                    | 0.48 | -11.0                    | 0.48 | -9.5                     | 0.41 | -9.4                     | 0.41 |
| ZINC35446839  | 294.4 | 1   | 3   | 2    | 3.079   | High                             | -9.1                     | 0.41 | -9.7                     | 0.44 | -9.0                     | 0.41 | -10.1                    | 0.46 |
| ZINC38304118  | 288.3 | 3   | 4   | 0    | 2.996   | Moderate                         | -9.7                     | 0.46 | -10.5                    | 0.50 | -9.2                     | 0.44 | -8.9                     | 0.42 |
| ZINC100074489 | 266.3 | 1   | 4   | 1    | 1.078   | High                             | -9.8                     | 0.49 | -9.5                     | 0.48 | -8.3                     | 0.42 | -9.1                     | 0.46 |
| ZINC225417079 | 272.3 | 2   | 3   | 0    | 3.42    | High                             | -9.0                     | 0.45 | -10.1                    | 0.51 | -9.1                     | 0.46 | -9.2                     | 0.46 |
| ZINC252463663 | 280.3 | 2   | 4   | 1    | -0.015  | High                             | -8.3                     | 0.42 | -8.6                     | 0.43 | -8.3                     | 0.42 | -8.1                     | 0.41 |

Table S3. Predicted LogIC50 values of selected compounds for ANN and BMLR models

| ZINC code   | Targets   |    |           |    |           |    |           |    |           |    |           |    |           |    |           |    | Average logIC <sub>50</sub> | AD |
|-------------|-----------|----|-----------|----|-----------|----|-----------|----|-----------|----|-----------|----|-----------|----|-----------|----|-----------------------------|----|
|             | AChE      |    |           |    | BACE1     |    |           |    | GSK3β     |    |           |    | SERT      |    |           |    |                             |    |
|             | MLR model | AD | ANN model | AD | MLR model | AD | ANN model | AD | MLR model | AD | ANN model | AD | MLR model | AD | ANN model | AD |                             |    |
| ZINC1219    | 2.456     | 1  | 3.690     | 1  | 3.740     | 1  | 3.958     | 1  | 2.652     | 1  | 3.160     | 1  | 0.376     | 0  | 1.715     | 0  | 2.718                       | 0  |
| ZINC116738  | 2.949     | 1  | 3.789     | 1  | 3.732     | 1  | 3.592     | 1  | 2.964     | 1  | 2.938     | 1  | 1.589     | 1  | 0.865     | 1  | 2.802                       | 1  |
| ZINC286766  | 3.333     | 1  | 3.896     | 1  | 3.563     | 1  | 3.429     | 1  | 4.334     | 1  | 3.142     | 1  | 0.918     | 1  | 0.617     | 1  | 2.904                       | 0  |
| ZINC338038  | 2.814     | 1  | 3.767     | 1  | 3.997     | 1  | 3.779     | 1  | 4.141     | 1  | 3.193     | 1  | 2.538     | 1  | 1.118     | 1  | 3.168                       | 1  |
| ZINC391977  | 2.468     | 1  | 3.676     | 1  | 3.870     | 1  | 3.897     | 1  | 3.274     | 1  | 3.158     | 1  | 0.776     | 0  | 1.692     | 0  | 2.851                       | 0  |
| ZINC402720  | 2.563     | 1  | 3.691     | 1  | 3.147     | 1  | 3.381     | 1  | 2.328     | 1  | 2.514     | 1  | -0.770    | 0  | 0.567     | 0  | 2.178                       | 0  |
| ZINC518541  | 2.739     | 1  | 3.658     | 1  | 4.529     | 1  | 3.766     | 1  | 4.588     | 0  | 3.160     | 1  | 1.305     | 1  | 0.783     | 1  | 3.066                       | 0  |
| ZINC519113  | 3.430     | 1  | 3.938     | 1  | 3.724     | 1  | 3.412     | 1  | 4.983     | 1  | 3.542     | 1  | 0.470     | 1  | 0.610     | 1  | 3.014                       | 1  |
| ZINC525976  | 3.676     | 1  | 4.007     | 1  | 3.064     | 1  | 3.234     | 1  | 4.244     | 0  | 3.338     | 1  | 1.676     | 1  | 0.619     | 1  | 2.982                       | 0  |
| ZINC565682  | 3.354     | 1  | 3.870     | 1  | 3.923     | 1  | 3.645     | 1  | 3.150     | 1  | 2.677     | 1  | 3.001     | 0  | 0.800     | 0  | 3.053                       | 0  |
| ZINC898768  | 2.587     | 1  | 3.699     | 1  | 4.026     | 1  | 3.844     | 1  | 3.949     | 1  | 3.254     | 1  | 3.799     | 0  | 1.601     | 0  | 3.345                       | 0  |
| ZINC1034491 | 2.715     | 1  | 3.665     | 1  | 4.114     | 1  | 3.776     | 1  | 2.637     | 1  | 2.684     | 1  | 1.107     | 0  | 1.044     | 0  | 2.718                       | 0  |
| ZINC1609684 | 3.218     | 1  | 3.934     | 1  | 2.452     | 0  | 3.565     | 1  | 1.548     | 1  | 2.385     | 1  | -0.084    | 0  | 1.164     | 0  | 2.273                       | 0  |
| ZINC1763229 | 2.729     | 1  | 3.659     | 1  | 3.499     | 1  | 3.631     | 1  | 3.795     | 1  | 2.997     | 1  | 2.768     | 0  | 0.990     | 0  | 3.008                       | 0  |
| ZINC1801081 | 2.544     | 1  | 3.675     | 1  | 4.028     | 1  | 3.739     | 1  | 2.933     | 1  | 2.636     | 1  | 0.273     | 0  | 0.759     | 0  | 2.573                       | 0  |
| ZINC2129833 | 2.952     | 1  | 3.782     | 1  | 3.820     | 1  | 3.453     | 1  | 3.043     | 1  | 2.997     | 1  | 1.885     | 1  | 0.884     | 1  | 2.852                       | 1  |
| ZINC2131836 | 2.847     | 1  | 3.763     | 1  | 3.446     | 1  | 3.551     | 1  | 4.136     | 1  | 3.320     | 1  | 1.002     | 0  | 0.843     | 0  | 2.863                       | 0  |
| ZINC2132617 | 3.270     | 1  | 3.819     | 1  | 3.135     | 1  | 3.239     | 1  | 4.868     | 1  | 3.396     | 1  | 0.834     | 0  | 0.600     | 0  | 2.895                       | 0  |
| ZINC3805477 | 2.822     | 1  | 3.657     | 1  | 4.001     | 1  | 3.593     | 1  | 4.308     | 0  | 3.312     | 1  | 2.187     | 1  | 0.765     | 1  | 3.081                       | 0  |
| ZINC3814360 | 3.115     | 1  | 3.805     | 1  | 4.736     | 1  | 3.688     | 1  | 6.247     | 0  | 3.805     | 1  | 2.023     | 0  | 1.180     | 0  | 3.575                       | 0  |
| ZINC3814414 | 3.223     | 1  | 3.841     | 1  | 4.205     | 1  | 3.511     | 1  | 6.281     | 0  | 3.714     | 1  | 1.478     | 0  | 0.844     | 0  | 3.387                       | 0  |
| ZINC3977996 | 2.931     | 1  | 3.763     | 1  | 3.637     | 1  | 3.380     | 1  | 5.046     | 0  | 3.403     | 1  | 1.575     | 0  | 0.778     | 0  | 3.064                       | 0  |
| ZINC4023561 | 3.335     | 1  | 3.934     | 1  | 3.392     | 1  | 3.528     | 1  | 3.467     | 1  | 2.665     | 1  | 2.645     | 0  | 0.893     | 0  | 2.982                       | 0  |
| ZINC4023795 | 3.144     | 1  | 3.809     | 1  | 5.280     | 0  | 3.830     | 1  | 9.760     | 0  | 4.166     | 1  | 1.935     | 0  | 1.123     | 0  | 4.131                       | 0  |
| ZINC4025911 | 3.194     | 1  | 3.908     | 1  | 3.641     | 1  | 3.554     | 1  | 2.272     | 1  | 2.745     | 1  | 0.667     | 0  | 0.607     | 0  | 2.573                       | 0  |
| ZINC4027357 | 2.824     | 1  | 3.677     | 1  | 3.518     | 1  | 3.356     | 1  | 4.683     | 1  | 3.291     | 1  | 0.763     | 0  | 0.577     | 0  | 2.836                       | 0  |
| ZINC4028010 | 2.207     | 1  | 3.467     | 1  | 3.661     | 1  | 3.625     | 1  | 2.366     | 1  | 2.647     | 1  | 1.628     | 0  | 1.075     | 0  | 2.585                       | 0  |
| ZINC4028387 | 3.167     | 1  | 3.866     | 1  | 3.625     | 1  | 3.572     | 1  | 3.856     | 1  | 3.151     | 1  | 2.574     | 0  | 0.921     | 0  | 3.092                       | 0  |
| ZINC4028576 | 2.947     | 1  | 3.798     | 1  | 3.186     | 1  | 3.265     | 1  | 3.578     | 1  | 3.097     | 1  | 1.270     | 1  | 0.579     | 1  | 2.715                       | 1  |
| ZINC4038093 | 2.771     | 1  | 3.737     | 1  | 3.270     | 1  | 3.520     | 1  | 3.393     | 1  | 3.132     | 1  | 1.130     | 0  | 0.804     | 0  | 2.720                       | 0  |
| ZINC4040762 | 3.631     | 1  | 4.026     | 1  | 3.615     | 1  | 3.534     | 1  | 4.766     | 1  | 3.294     | 1  | 0.969     | 1  | 0.707     | 1  | 3.068                       | 0  |

| ZINC code     | Targets   |    |           |    |           |    |           |    |           |    |           |    |           |    |           |    | Average logIC <sub>50</sub> | AD |
|---------------|-----------|----|-----------|----|-----------|----|-----------|----|-----------|----|-----------|----|-----------|----|-----------|----|-----------------------------|----|
|               | AChE      |    |           |    | BACE1     |    |           |    | GSK3β     |    |           |    | SERT      |    |           |    |                             |    |
|               | MLR model | AD | ANN model | AD | MLR model | AD | ANN model | AD | MLR model | AD | ANN model | AD | MLR model | AD | ANN model | AD |                             |    |
| ZINC4041614   | 3.223     | 1  | 3.819     | 1  | 3.725     | 1  | 3.643     | 1  | 4.402     | 1  | 3.137     | 1  | 2.137     | 0  | 0.912     | 0  | 3.125                       | 0  |
| ZINC4082030   | 3.151     | 1  | 3.825     | 1  | 4.196     | 1  | 3.536     | 1  | 6.116     | 0  | 3.854     | 1  | 2.036     | 0  | 1.078     | 0  | 3.474                       | 0  |
| ZINC4090104   | 1.975     | 1  | 3.407     | 1  | 3.577     | 1  | 3.722     | 1  | 2.817     | 1  | 2.828     | 1  | 2.234     | 0  | 1.365     | 0  | 2.741                       | 0  |
| ZINC4538008   | 3.217     | 1  | 3.845     | 1  | 4.155     | 1  | 3.516     | 1  | 4.641     | 1  | 3.572     | 1  | 1.887     | 0  | 0.966     | 0  | 3.225                       | 0  |
| ZINC4654724   | 2.888     | 1  | 3.799     | 1  | 2.715     | 1  | 3.315     | 1  | 2.630     | 1  | 3.219     | 1  | 1.898     | 0  | 1.036     | 0  | 2.688                       | 0  |
| ZINC4655109   | 2.549     | 1  | 3.686     | 1  | 4.154     | 1  | 3.873     | 1  | 3.846     | 1  | 3.250     | 1  | 3.224     | 0  | 1.478     | 0  | 3.258                       | 0  |
| ZINC5179869   | 3.147     | 1  | 3.847     | 1  | 4.136     | 1  | 3.627     | 1  | 2.934     | 1  | 2.978     | 1  | 1.539     | 1  | 0.772     | 1  | 2.872                       | 0  |
| ZINC5733557   | 2.804     | 1  | 3.777     | 1  | 3.977     | 1  | 3.840     | 1  | 3.422     | 1  | 3.154     | 1  | 1.597     | 0  | 1.307     | 0  | 2.985                       | 0  |
| ZINC6525252   | 2.453     | 1  | 3.671     | 1  | 3.938     | 1  | 3.910     | 1  | 3.505     | 1  | 3.297     | 1  | 0.912     | 0  | 1.737     | 0  | 2.928                       | 0  |
| ZINC8623851   | 3.882     | 1  | 4.082     | 1  | 3.613     | 1  | 3.528     | 1  | 3.849     | 1  | 3.283     | 1  | 1.060     | 1  | 0.743     | 1  | 3.005                       | 0  |
| ZINC14684865  | 2.961     | 1  | 3.714     | 1  | 3.122     | 1  | 3.462     | 1  | 4.134     | 1  | 3.360     | 1  | 1.696     | 0  | 0.868     | 0  | 2.915                       | 0  |
| ZINC14719962  | 2.491     | 1  | 3.663     | 1  | 2.570     | 1  | 3.220     | 1  | 2.064     | 1  | 2.886     | 1  | 1.445     | 0  | 0.792     | 0  | 2.391                       | 0  |
| ZINC14829817  | 2.429     | 1  | 3.628     | 1  | 3.659     | 1  | 3.607     | 1  | 3.757     | 1  | 3.185     | 1  | 1.426     | 0  | 0.970     | 0  | 2.833                       | 0  |
| ZINC31158814  | 2.957     | 1  | 3.800     | 1  | 2.592     | 1  | 3.149     | 1  | 3.233     | 1  | 3.212     | 1  | 1.858     | 1  | 0.743     | 1  | 2.693                       | 1  |
| ZINC35446833  | 2.855     | 1  | 3.704     | 1  | 4.256     | 1  | 3.685     | 1  | 3.532     | 1  | 3.182     | 1  | 1.517     | 1  | 0.952     | 1  | 2.960                       | 1  |
| ZINC35446839  | 2.659     | 1  | 3.627     | 1  | 4.305     | 1  | 3.569     | 1  | 3.770     | 1  | 3.285     | 1  | 2.642     | 1  | 0.916     | 1  | 3.097                       | 1  |
| ZINC35466008  | 2.837     | 1  | 3.729     | 1  | 3.795     | 0  | 3.597     | 0  | 3.723     | 1  | 3.130     | 1  | 2.532     | 0  | 1.085     | 0  | 3.054                       | 0  |
| ZINC38304118  | 2.866     | 1  | 3.757     | 1  | 3.453     | 0  | 3.553     | 0  | 3.271     | 1  | 3.168     | 1  | 1.250     | 0  | 0.930     | 0  | 2.781                       | 0  |
| ZINC49169727  | 2.988     | 1  | 3.739     | 1  | 4.041     | 1  | 3.659     | 1  | 3.434     | 1  | 2.758     | 1  | 1.421     | 1  | 0.846     | 1  | 2.861                       | 0  |
| ZINC49170581  | 3.221     | 1  | 3.893     | 1  | 4.213     | 1  | 3.721     | 1  | 2.841     | 1  | 2.857     | 1  | 1.673     | 1  | 0.728     | 1  | 2.893                       | 1  |
| ZINC49170716  | 3.106     | 1  | 3.873     | 1  | 4.237     | 1  | 3.819     | 1  | 3.622     | 1  | 2.903     | 1  | 0.681     | 1  | 0.758     | 1  | 2.875                       | 1  |
| ZINC49170953  | 3.271     | 1  | 3.911     | 1  | 4.286     | 1  | 3.740     | 1  | 3.021     | 1  | 2.995     | 1  | 0.641     | 1  | 0.738     | 1  | 2.825                       | 1  |
| ZINC100074489 | 3.307     | 1  | 3.956     | 1  | 2.699     | 1  | 3.655     | 1  | 1.751     | 1  | 2.553     | 1  | 0.469     | 0  | 0.889     | 0  | 2.410                       | 0  |
| ZINC225417079 | 3.024     | 1  | 3.805     | 1  | 2.978     | 1  | 3.373     | 1  | 3.514     | 1  | 3.360     | 1  | 2.005     | 0  | 0.814     | 0  | 2.859                       | 0  |
| ZINC225482257 | 3.478     | 1  | 3.958     | 1  | 4.128     | 1  | 3.623     | 1  | 4.377     | 0  | 3.114     | 1  | 1.122     | 1  | 0.719     | 1  | 3.065                       | 0  |
| ZINC252463663 | 2.643     | 1  | 3.678     | 1  | 3.382     | 1  | 3.524     | 1  | 3.843     | 1  | 3.083     | 1  | 2.740     | 0  | 1.122     | 0  | 3.002                       | 0  |

**Table S4. The analysis of the interactions between receptors and small molecule ligands**

| ZINC code  | Structure                                                                           | AChE                                                               | BACE1                                                               | GSK3 $\beta$                                                                                     | SERT                                                                |
|------------|-------------------------------------------------------------------------------------|--------------------------------------------------------------------|---------------------------------------------------------------------|--------------------------------------------------------------------------------------------------|---------------------------------------------------------------------|
| ZINC1219   | 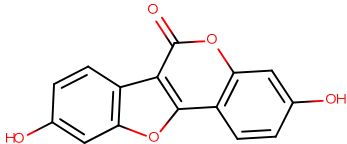   | Asp74, Trp86, Tyr124,<br>Ser125, Glu202, Tyr337,<br>Tyr341, Gly448 | Tyr71, Phe108                                                       | Ala83, Lys85, Leu132,<br>Val135 (NH...OH),<br>Leu188, Cys199,<br>Asp200                          | Ile172, Tyr176, Gly338,<br>Phe341, Ser439                           |
| ZINC116738 |    | Trp86, Asn87, Gly121,<br>Tyr124, Ser125, Tyr337,<br>Tyr341         | Tyr71, Thr72, Phe108,<br>Ile118                                     | Ile62, Val70, Ala83,<br>Lys85 (NH <sub>3</sub> <sup>+</sup> ...O),<br>Tyr134, Val135,<br>Leu188  | Gly100, Gln332,<br>Phe335 (O...H <sub>2</sub> N),<br>Gly498, Phe556 |
| ZINC286766 |   | Tyr72 (O...HN), Val73,<br>Asp74, Leu76, Tyr124,<br>Trp286, Tyr341  | Tyr71, Phe108, Ile118                                               | Val70, Ala83, Val135,<br>Leu188, Cys199                                                          | Tyr95, Ile172, Ser438,<br>Gly442                                    |
| ZINC338038 |  | Asp74, Trp86, Gly121,<br>Tyr124, Ser125, Tyr337,<br>Tyr341         | Tyr71, Phe108, Ile118,<br>Thr231, Arg235<br>(NH <sub>2</sub> ...OH) | Asn64 (NH...OH,<br>O...HO), Val70, Ala83,<br>Lys85, Leu132,<br>Asp133, Val135,<br>Leu188, Cys199 | Tyr95, Ile172, Tyr176,<br>Gly338, Phe341,<br>Ser438, Ser439, Gly442 |

| ZINC code  | Structure                                                                           | AChE                                                                                           | BACE1                                   | GSK3β                                                                                                       | SERT                                                                                   |
|------------|-------------------------------------------------------------------------------------|------------------------------------------------------------------------------------------------|-----------------------------------------|-------------------------------------------------------------------------------------------------------------|----------------------------------------------------------------------------------------|
| ZINC391977 | 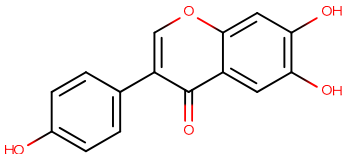   | Asp74, Trp86, Tyr124,<br>Trp286, Tyr341                                                        | Tyr71, Lys224                           | Ile62, Lys85 (NH <sub>3</sub> <sup>+</sup> ...<br>OH), Leu132, Thr138,<br>Arg141, Leu188,<br>Cys199, Asp200 | Tyr95, Ile172, Ala173,<br>Tyr176, Asn177,<br>Phe335, Ser336,<br>Ser438, Ser439, Gly442 |
| ZINC402720 |    | Asp74, Trp86 (O...HO),<br>Gly121, Tyr124, Ser125,<br>Gly126, Tyr337, Tyr347,<br>His447, Gly448 | Ser35, Tyr71, Gln73,<br>Phe108, Ile118  | Val135 (NH...O),<br>Arg141, Leu188,<br>Cys199                                                               | Arg104, Tyr175<br>(OH...O), Phe335,<br>Thr497 (OH...O),<br>Phe556                      |
| ZINC518541 |    | Asp74, Tyr124, Ser125,<br>Trp286, Tyr337, Phe338,<br>Tyr341                                    | Tyr71, Phe108,<br>Lys224, Ile226        | Ile62, Val70, Ala83,<br>Lys85, Leu188                                                                       | Ile172, Phe341, Ser438,<br>Gly442, Val501                                              |
| ZINC519113 |  | Tyr72, Asp74, Leu76,<br>Tyr124, Trp286, Tyr341                                                 | Tyr71, Thr72, Tyr198,<br>Ile226, Thr329 | Gly63, Asn64 (NH...<br>O), Val70, Ala83,<br>Thr138, Leu188,<br>Cys199                                       | Ile172, Tyr176, Gly338,<br>Phe341, Ser439,<br>Gly442                                   |

| ZINC code   | Structure                                                                           | AChE                                                                                             | BACE1                                                        | GSK3β                                                                                   | SERT                                                                                 |
|-------------|-------------------------------------------------------------------------------------|--------------------------------------------------------------------------------------------------|--------------------------------------------------------------|-----------------------------------------------------------------------------------------|--------------------------------------------------------------------------------------|
| ZINC525976  | 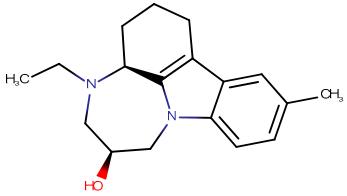   | Asp74, Tyr124, Trp286,<br>Leu289, Tyr341                                                         | Gly34, Tyr71, Phe108,<br>Val332                              | Ile62, Ala83, Lys85,<br>Leu132, Val135,<br>Thr138, Gln185,<br>Leu188, Cys199,<br>Asp200 | Tyr95, Ile172, Phe335,<br>Gly442                                                     |
| ZINC565682  |    | Tyr72, Asp74, Trp86,<br>Asn87, Tyr124, Trp286,<br>Phe338, Tyr341                                 | Tyr71, Phe108, Ile226                                        | Ile62, Leu132, Val135,<br>Leu188                                                        | Ile172, Ala173, Tyr176,<br>Asn177, Phe335<br>(O...HN), Gly338,<br>Phe341, Ser439     |
| ZINC898768  |    | Val73, Asp74, Trp86,<br>Asn87, Tyr124, Trp286,<br>Phe338, Tyr241                                 | Ser35, Tyr71, Ile118,<br>Arg235, Thr329<br>(OH...HO)         | Lys85, Leu132,<br>Arg141, Leu188                                                        | Tyr95, Ala96, Ile172,<br>Tyr176, Phe341,<br>Ser439, Gly442                           |
| ZINC1034491 |  | Asp74, Trp86, Gly121,<br>Tyr124 (HO...HN), Ser125<br>(OH...O), Glu202, Tyr337,<br>Tyr347, His447 | Tyr71, Phe108, Ile226,<br>Asp228 (O...HN),<br>Thr231, Val332 | Ile62, Val70, Lys85<br>(NH3+...O), Val135,<br>Lys183 (NH3+...O),<br>Leu188, Asp200      | Ile172, Tyr175<br>(OH...O), Asn177,<br>Phe335 (O...HN),<br>Gly338, Phe341,<br>Ser439 |



| ZINC code   | Structure                                                                           | AChE                                                                  | BACE1                                                                | GSK3β                                                                         | SERT                                                     |
|-------------|-------------------------------------------------------------------------------------|-----------------------------------------------------------------------|----------------------------------------------------------------------|-------------------------------------------------------------------------------|----------------------------------------------------------|
| ZINC1609684 | 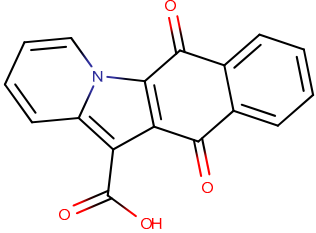   | Asp74, Trp86, Gly121, Tyr124, Ser125, Gly126, Tyr337 (OH...O), Tyr341 | Tyr71, Thr72, Phe108, Tyr198                                         | Ala83, Lys85, Leu132, Val135, Leu188                                          | Arg104, Tyr176, Phe335, Thr497, Gly498, Phe556           |
| ZINC1763229 |    | Tyr124, Trp286, Phe338                                                | Tyr71, Phe108                                                        | Ala83, Tyr134, Val135, Thr138                                                 | Tyr95, Ile172, Phe341, Ser438                            |
| ZINC1801081 |    | Asp74, Thr75, Trp86, Gly121, Tyr124, Ser125 (HO...O), Tyr341          | Ser35 (OH...O), Asn37, Tyr71 (OH...O), Gln73, Trp76 (NH...O), Ile118 | Asn64, Gly68, Val70, Ala83, Lys85 (NH3+...OH), Leu132, Val135, Leu188, Asp200 | Ile172, Tyr176, Asn177 (NH2...O), Phe341, Ser439, Gly442 |
| ZINC2129833 |  | Asp74, Thr75 (NH...O), Tyr124, Trp286, Phe295, Phe338, Tyr341         | Ser35, Tyr71, Gln73, Phe108, Ile110                                  | Asn64, Gly65, Val70, Lys85 (NH3+...O), Leu132, Val135, Asp200                 | Ile172, Tyr175, Tyr176, Phe335, Gly442, Glu493, Thr497   |

| ZINC code   | Structure                                                                           | AChE                                                                                   | BACE1                                    | GSK3β                                                            | SERT                                                                               |
|-------------|-------------------------------------------------------------------------------------|----------------------------------------------------------------------------------------|------------------------------------------|------------------------------------------------------------------|------------------------------------------------------------------------------------|
| ZINC2131836 | 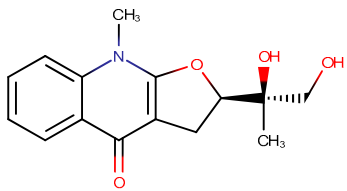   | Asp74, Trp86, Gly121,<br>Gly1222, Ser125, Ser203,<br>Tyr337, Tyr341, His447,<br>Gly448 | Gly34 (O...HO),<br>Tyr71, Phe108, Thr231 | Ile62, Lys85, Arg141,<br>Leu188                                  | Gly100, Trp103,<br>Arg104, Phe335,<br>Thr497                                       |
| ZINC2132617 |    | Trp286, Val294, Tyr341                                                                 | Tyr71, Tyr198                            | Val70, Ala83, Leu132,<br>Tyr134, Leu188,<br>Cys199               | Ile172, Phe341, Gly442                                                             |
| ZINC3805477 |    | Trp286, Val294, Phe297,<br>Phe338, Tyr341                                              | Tyr71, Phe108, Ile118                    | Ile62, Gly63, Val70,<br>Ala83, Leu132, Val135,<br>Leu188, Cys199 | Ile172, Tyr176, Phe341,<br>Gly442, Val501                                          |
| ZINC3814360 |  | Tyr72, Trp286, Ser341<br>(NH...OH), Tyr341                                             | Tyr71, Gln73, Phe108                     | Ile62, Val70, Ala83,<br>Lys85, Val135, Lys183,<br>Leu188, Cys199 | Tyr95, Asp98 (COO-<br>...HO), Ile172, Tyr176,<br>Gly338, Phe341,<br>Ser438, Ser439 |

| ZINC code   | Structure | AChE                                                                    | BACE1                                        | GSK3β                                                                                             | SERT                                                                                    |
|-------------|-----------|-------------------------------------------------------------------------|----------------------------------------------|---------------------------------------------------------------------------------------------------|-----------------------------------------------------------------------------------------|
| ZINC3814414 |           | Tyr72, Asp74, Thr75 (NH...OH), Trp286, Leu289, Ser293 (NH...OH), Tyr341 | Tyr71, Gln73, Phe108                         | Ile62, Val70, Ala83, Lys85, Val135, Leu188, Cys199, Asp200                                        | Tyr95, Ala169, Ile172, Ala173, Tyr176, Phe335 (O...HO), Phe341, Ser439, Gly442          |
| ZINC3977996 |           | Asp74 (O...HO), Thr75, Leu76, Trp286 (O...HO), Ser293 (NH...OH)         | Asp32, Tyr71, Phe108 (O...HO), Asp228        | Ile62, Val70, Lys85 (N+H3...OH), Leu132, Val135, Pro136 (O...HO), Leu188, Cys199, Asp200 (NH...O) | Tyr95, Ala169, Ile172, Ala173, Gly338, Phe341, Ser439 (O...HO, HO...HO), Gly442, Leu443 |
| ZINC4023561 |           | Asp74, Trp86, Gly120, Gly121, Tyr124, Ser125, Tyr337                    | Gly34, Tyr71, Thr72, Phe108, Tyr198 (OH...O) | Ile62, Gly63, Asn64, Ala83, Lys85, Tyr134, Val135, Leu188, Cys199                                 | Ile172, Tyr175 (OH...N), Tyr176, Phe335, Thr497 (OH...O), Val501                        |
| ZINC4023795 |           | Tyr72, Leu76, Trp286, Leu289, Tyr341                                    | Tyr71, Gln73 (O...HO), Phe108                | Ile62, Val135, Thr138 (OH...OH), Leu188                                                           | Tyr95, Ile172, Tyr175, Tyr176, Phe335, Phe341, Glu493, Thr497 (OH...OH)                 |

| ZINC code   | Structure                                                                           | AChE                                                                                          | BACE1                                                        | GSK3β                                                                        | SERT                                                                                         |
|-------------|-------------------------------------------------------------------------------------|-----------------------------------------------------------------------------------------------|--------------------------------------------------------------|------------------------------------------------------------------------------|----------------------------------------------------------------------------------------------|
| ZINC4025911 | 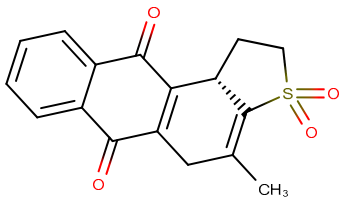   | Trp286, Tyr341                                                                                | Tyr71, Phe108, Arg235, Thr329                                | Asn64 (NH...O:S), Ala83, Leu132, Asp133, Val135, Leu188                      | Tyr95, Ile172, Ala173, Phe341, Ser438, Ser439, Gly442, Leu443                                |
| ZINC4027357 |    | Tyr72, Asp74 (COO...HN <sup>+</sup> ), Trp86, Tyr124, Ser125, Trp286, Tyr337, Tyr341(HO...HN) | Leu30, Asp32 (COO...HN <sup>+</sup> ), Tyr71, Phe108, Ile110 | Ile62, Gly63 (O...HN), Val70, Val135, Thr138, Tyr140, Arg141, Gln185, Leu188 | Tyr95 (HO...HN, HN <sup>+</sup> ), Ile172, Tyr176, Phe335, Ser438, Gly442                    |
| ZINC4028010 |    | Tyr72, Trp86, Gly121, Ser125, Tyr337, Tyr341                                                  | Tyr71, Phe108, Asp228, Thr231, Arg235                        | Ile62, Val70, Lys85, Val135, Leu188, Asp200                                  | Tyr95, Ala96, Ala169, Ile172, Ala173, Tyr176, Asn177, Leu337, Gly338, Phe341, Ser439, Gly442 |
| ZINC4028387 |  | Tyr72, Thr75, Tyr124, Trp286, Phe338, Tyr341                                                  | Tyr71                                                        | Ile62, Gly63, Val70, Ala83, Val135, Thr138, Leu188                           | Tyr95, Asp98, Ile172, Tyr176, Phe335, Phe341, Ser438, Ser439, Gly442                         |

| ZINC code   | Structure                                                                           | AChE                                                                       | BACE1                            | GSK3β                                                                         | SERT                                                                                              |
|-------------|-------------------------------------------------------------------------------------|----------------------------------------------------------------------------|----------------------------------|-------------------------------------------------------------------------------|---------------------------------------------------------------------------------------------------|
| ZINC4028576 | 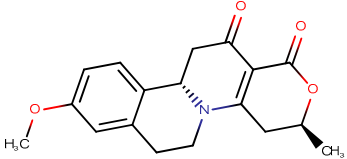   | Tyr72, Asp74, Trp86,<br>Tyr124, Ser125, Tyr341                             | Tyr71, Lys224,<br>Arg235, Thr329 | Ile62, Val70, Lys85,<br>Val135 (NH...O),<br>Thr138, Leu188,<br>Cys199         | Tyr95, Ile172, Ala173,<br>Tyr176, Phe335<br>(O...O), Gly338,<br>Phe341, Ser438,<br>Gly442, Leu443 |
| ZINC4038093 |    | Trp86, Gly121, Ser125,<br>Tyr337, Tyr341                                   | Tyr71, Thr72, Phe108             | Ile62, Ala83, Leu132,<br>Asp133, Tyr134,<br>Val135, Thr138,<br>Leu188, Cys199 | Gly100, Arg104,<br>Phe335 (O...HO),<br>Gly498                                                     |
| ZINC4040762 |    | Asp74, Trp86, Gly120,<br>Gly121, Tyr124, Ser125,<br>Trp286, Tyr337, Tyr341 | Tyr71, Phe108, Lys224            | Ile62, Gly65, Gly68,<br>Val70, Lys85<br>(NH3+...O), Cys199                    | Tyr95, Tyr176, Phe335,<br>Thr497, Gly498                                                          |
| ZINC4041614 |  | Tyr72, Asp74, Trp86,<br>Gly121, Tyr124, Ser125,<br>Tyr337 (HO...O), Tyr341 | Tyr71, Thr72, Phe108,<br>Tyr198  | Ala83, Lys85<br>(NH3+...O), Leu132,<br>Val135, Leu188                         | Tyr95, Ala169, Ile172,<br>Ala173, Tyr176,<br>Gly338, Ser438,<br>Ser439, Gly442                    |

| ZINC code   | Structure                                                                           | AChE                                                                                          | BACE1                                                         | GSK3β                                                                        | SERT                                                                                         |
|-------------|-------------------------------------------------------------------------------------|-----------------------------------------------------------------------------------------------|---------------------------------------------------------------|------------------------------------------------------------------------------|----------------------------------------------------------------------------------------------|
| ZINC4082030 | 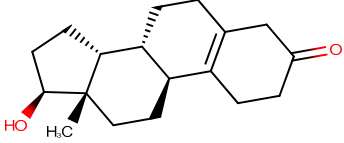   | Asp74, Trp86, Gly121,<br>Tyr124, Ser125, Glu202,<br>Ser203, Tyr337, Phe338,<br>His447, Gly448 | Tyr71, Gln73, Lys107,<br>Phe108,                              | Ile62, Val70, Ala83,<br>Lys85, Leu132, Val135<br>(NH...O), Asn186,<br>Leu188 | Asp98, Gly100,<br>Phe335, Glu493,<br>Thr497, Gly498                                          |
| ZINC4090104 |    | Asp74, Trp86, Gly121,<br>Ser125, Tyr337 (OH...O),<br>Tyr341                                   | Ser35 (OH...O),<br>Asn37, Tyr71<br>(OH...O), Trp76,<br>Ile118 | Ile62, Val70, Lys85<br>(NH3+...O), Val135,<br>Leu188, Cys199,<br>Asp200      | Ile172, Asn177,<br>Phe335, Gly338,<br>Phe341, Leu443,<br>Val501                              |
| ZINC4538008 |    | Tyr72, Asp74, Tyr124,<br>Trp286, Leu289                                                       | Tyr71, Gln73, Phe108,<br>Ile118                               | Ile62, Val135, Thr138<br>(OH...OH), Arg141,<br>Gln185, Leu188                | Ala96, Asp98, Ile172,<br>Tyr176, Leu337,<br>Gly338, Phe341,<br>Ser438, Ser439                |
| ZINC4654724 |  | Tyr72, Asp74, Thr75,<br>Tyr124, Trp286, Ser293,<br>Tyr341                                     | Tyr71, Gln73, Phe108,<br>Ile226, Asp228,<br>Thr231, Val332    | Ile62, Asn64, Val70,<br>Ala83, Lys85, Leu132,<br>Tyr134, Val135,<br>Asp200   | Tyr175 (OH...O),<br>Tyr176, Phe335,<br>Phe341, Ser438,<br>Gly442, Glu493,<br>Thr497 (O...HO) |

| ZINC code   | Structure                                                                           | AChE                                                                         | BACE1                                        | GSK3β                                                                | SERT                                                                                  |
|-------------|-------------------------------------------------------------------------------------|------------------------------------------------------------------------------|----------------------------------------------|----------------------------------------------------------------------|---------------------------------------------------------------------------------------|
| ZINC4655109 | 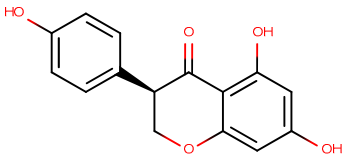   | Asp74, Trp86, Tyr124, Ser125, <i>Glu202</i> (COO...HO), Tyr337, Tyr341       | Gly34, Tyr71, <i>Lys107</i> (O...HO), Phe108 | Val70, Ala83, Lys85, Leu132, <i>Val135</i> (NH...OH), Leu188, Asp200 | Tyr95, Ala169, Ile172, Ala173, Tyr176, Asn177, Phe335, Gly338, Ser438, Ser439, Gly442 |
| ZINC5179869 |    | Asp74, Trp86, Tyr124, Ser125 (HO...O), Trp286, Tyr337, Tyr341                | Ser35, Tyr71, Gln73, Phe108, Tyr198          | Val70, Ala83, Lys85, Val135, Gln185, Leu188, Asp200                  | Ile172, Phe341, Gly442, Val501                                                        |
| ZINC5733557 |    | Asp74, Trp86, Tyr124, Ser125, Trp286, <i>Phe295</i> (NH...O), Phe338, Tyr341 | Ser35, Tyr71, Tyr198                         | Ile62, Leu132, <i>Val135</i> (NH...O), <i>Arg141</i> (NH2...OH)      | Ala169, Ile172, Tyr176, Phe341, Ser439, Gly442, Val501                                |
| ZINC6525252 |  | Tyr72, Val73, Asp74, Thr83, Trp86, Tyr124, Trp286, Tyr341                    | Tyr71, Phe108                                | Val70, <i>Val135</i> (NH...O), Leu188                                | Tyr95, Ile172, Tyr176, Ser336, Ser438, Ser439, Gly442                                 |

| ZINC code    | Structure                                                                           | AChE                                                                     | BACE1                                          | GSK3β                                                                                        | SERT                                                                                          |
|--------------|-------------------------------------------------------------------------------------|--------------------------------------------------------------------------|------------------------------------------------|----------------------------------------------------------------------------------------------|-----------------------------------------------------------------------------------------------|
| ZINC8623851  | 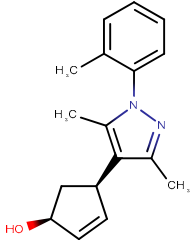   | Tyr72, Val73, Asp74,<br>Thr75, Tyr124, Trp286,<br>Tyr341                 | Tyr71                                          | Ile62, Val70, Lys85,<br>Leu132, Val135, <i>Pro136</i><br>(O...HO), Leu188,<br>Cys199, Asp200 | Ile172, Tyr175, Tyr176,<br>Phe335, Gly338,<br><i>Thr497 (OH...OH)</i>                         |
| ZINC14684865 |    | Tyr72, Asp74, Trp86,<br>Asn87, Gly121, Tyr124,<br>Ser125, Tyr337, Tyr347 | Tyr71, Thr72, <i>Gln73</i><br>(NH...O), Ile118 | Val70, Lys85, Leu132,<br><i>Val135 (NH...O)</i> ,<br>Thr138, Leu188                          | Ile172, Tyr176, Phe335,<br>Gly338, Phe341,<br>Ser438                                          |
| ZINC14719962 |    | Asp74, Trp286, Ser293,<br>Tyr341                                         | Tyr71, Phe108, Tyr198                          | <i>Ile62 (O...HO)</i> , Lys85,<br>Leu132, Thr138,<br>Arg141                                  | Tyr95, Asp98, Ala169,<br>Ile172, Ala173, Tyr176,<br>Ser336, Gly338,<br>Phe341, Ser438, Ser439 |
| ZINC14829817 |  | Tyr72, Asp74, Trp86,<br>Gly121, Tyr124, Ser125,<br>Tyr337, Tyr341        | Tyr71, Phe108, Ile226,<br>Asp228               | Ile62, Leu132, Tyr134,<br><i>Val135 (NH...OH)</i> ,<br>Thr138, Arg141                        | <i>Tyr95 (HO...HO)</i> ,<br>Ile172, Tyr176, Phe335,<br>Ser439, Gly442                         |



| ZINC code    | Structure                                                                           | AChE                                                               | BACE1                                               | GSK3β                                                                      | SERT                                                                                                          |
|--------------|-------------------------------------------------------------------------------------|--------------------------------------------------------------------|-----------------------------------------------------|----------------------------------------------------------------------------|---------------------------------------------------------------------------------------------------------------|
| ZINC31158814 | 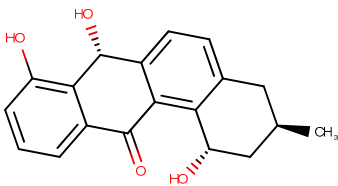   | Asp74, Tyr124, Trp286,<br>Ser293, Val294, Tyr341                   | Gly34 (O...HO),<br>Tyr71, Gln73, Phe108             | Val70, Lys85, Leu132,<br>Val135, Pro136,<br>Thr138, Arg141                 | Tyr95, Ile172, Ala173,<br>Tyr176, Phe335,<br>Phe341, Ser438<br>(O...HO), Ser439,<br>Gly442                    |
| ZINC35446833 |    | Asp74, Trp86, Tyr124,<br>Trp286, Tyr337, Tyr341                    | Gly34, Tyr71, Phe108,<br>Lys224, Thr329             | Ile62, Val70, Ala83,<br>Lys85, Val135, Lys183,<br>Leu188, Cys199           | Asp98, Ala169, Ile172,<br>Ala173, Asn177,<br>Ser336, Phe341,<br>Ser439, Gly442,<br>Leu443                     |
| ZINC35446839 |    | Asp74, Trp86, Tyr124,<br>Trp286, Ser293, Tyr337,<br>Tyr341         | Tyr71, Phe108,<br>Trp115, Lys224,<br>Arg235, Thr329 | Ile62, Gly65, Val70,<br>Ala83, Lys85, Tyr134,<br>Val135, Leu188,<br>Cys199 | Ala169, Ile172, Ala173,<br>Asn177, Phe334,<br>Phe335, Gly338,<br>Phe341, Ser439,<br>Gly442, Leu443,<br>Val501 |
| ZINC35466008 |  | Tyr72, Leu76, Tyr124,<br>Trp286, Phe295, Phe297,<br>Phe338, Tyr341 | Ser35, Tyr71, Gln73<br>(NH...OH)                    | Ile62, Val70, Lys85<br>(NH3+...O), Thr138,<br>Leu188, Cys199,<br>Asp200    | Tyr95, Ile172, Phe335<br>(O...HO), Ser336,<br>Gly338, Phe341,<br>Val501                                       |

| ZINC code    | Structure                                                                          | AChE                                                                       | BACE1                                         | GSK3β                                                           | SERT                                                                                  |
|--------------|------------------------------------------------------------------------------------|----------------------------------------------------------------------------|-----------------------------------------------|-----------------------------------------------------------------|---------------------------------------------------------------------------------------|
| ZINC38304118 | 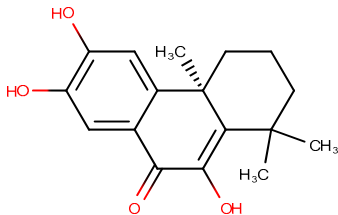  | Tyr124, Trp286, Tyr341                                                     | Tyr71, Thr72, Gln73 (NH...O, O...HO), Phe108  | Gly63, Asn64, Val70, Val110, Leu132, Val135 (NH...O), Leu188    | Asp98, Ile172, Tyr176, Phe335, Gly338, Phe341, Ser438, Ser439, Gly442                 |
| ZINC49169727 |   | Tyr72, Asp74, Trp86, Tyr124, Ser203, Tyr337, Tyr347                        | Tyr71, Thr72 (NH...N), Phe108, Lys224, Thr329 | Ile62, Ala83, Lys85, Val135, Leu188                             | Tyr95, Ala96, Asp98, Ala169, Ile172, Ala173, Leu337, Gly338, Ser439, Phe341, Gly442   |
| ZINC49170581 |   | Tyr72, Asp74, Trp86, Gly121, Tyr124, Trp286, Tyr337, Tyr341                | Gly34, Tyr71, Phe108, Val332, Thr329          | Ile62, Ala83, Lys85, Val135, Asn186, Leu188, Asp200 (COO...HN+) | Tyr95, Ala169, Ile172, Ala173, Phe335, Gly338, Phe341, Ser439, Gly442, Leu443, Val501 |
| ZINC49170716 |  | Asp74, Tyr124 (OH...O), Trp286, Tyr337 (OH...N, HO...HN), Tyr341 (HO...HN) | Gly13, Tyr71, Ile110                          | Ile62, Val70, Lys85, Leu188, Asp200                             | Tyr95, Ile172, Tyr176, Phe335, Phe341, Thr497 (OH...N)                                |

| ZINC code     | Structure                                                                           | AChE                                                                                 | BACE1                                          | GSK3β                                                                                      | SERT                                                                             |
|---------------|-------------------------------------------------------------------------------------|--------------------------------------------------------------------------------------|------------------------------------------------|--------------------------------------------------------------------------------------------|----------------------------------------------------------------------------------|
| ZINC49170953  | 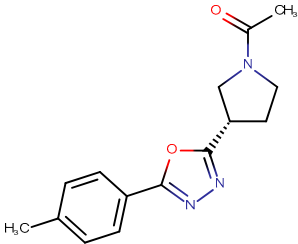   | Tyr72, Asp74, Trp86,<br>Gly121, Tyr124 (HO...O),<br>Trp286, Tyr337, Tyr341           | Tyr71, Phe108,<br>Arg235, Thr239               | Ala83, Lys85<br>(NH <sub>3</sub> <sup>+</sup> ...N), Val135,<br>Leu188                     | Tyr95, Ile172, Tyr175,<br>Phe335, Thr497<br>(HO...HN, OH...N),<br>Gly498, Val501 |
| ZINC100074489 |    | Trp86, Glu120, Gly121,<br>Ser125, Tyr337 (OH...O)                                    | Tyr71, Thr72, Gln73,<br>Phe108, Ile118, Tyr198 | Lys85, Cys199                                                                              | Arg104, Gln332,<br>Phe335, Thr497,<br>Gly498                                     |
| ZINC225417079 |    | Tyr72, Asp74, Trp86,<br>Tyr124, Trp286, Tyr337,<br>Tyr341                            | Ser35, Tyr71, Gln73,<br>Phe108, Ile118         | Ile62, Ala83, Leu132,<br>Asp133, Tyr134,<br>Val135 (NH...OH),<br>Thr138, Arg141,<br>Leu188 | Ile172, Ala173, Tyr176,<br>Asn177, Phe341,<br>Ser439, Gly442,<br>Leu443          |
| ZINC225482257 |  | Tyr72, Asp74, Thr75<br>(NH...O), Leu76, Trp286,<br>Val294, Phe295, Phe338,<br>Tyr341 | Tyr71, Gln73, Phe108,<br>Ile118                | Ile62, Val70, Ala83,<br>Leu132, Val135,<br>Leu188, Cys199                                  | Tyr95 (O...O), Asp98,<br>Ile172, Phe341, Ser439,<br>Gly442                       |

| ZINC code     | Structure                                                                         | AChE                                                                       | BACE1                                                              | GSK3β                                         | SERT                                             |
|---------------|-----------------------------------------------------------------------------------|----------------------------------------------------------------------------|--------------------------------------------------------------------|-----------------------------------------------|--------------------------------------------------|
| ZINC252463663 | 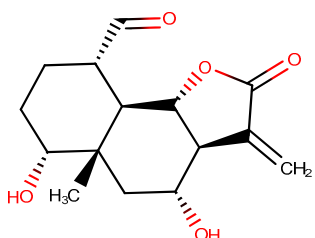 | Asp74, Trp86, Gly120,<br>Gly121, Tyr124, Ser125,<br>Tyr133, Tyr337, Tyr341 | Ser35, Tyr71, <i>Thr72</i><br>( <i>NH...O</i> ), Ile118,<br>Asp228 | Ile62, Gly63, Val70,<br>Lys85, Cys199, Asp200 | Asp98, Ile172, Tyr176,<br>Phe341, Ser438, Ser439 |

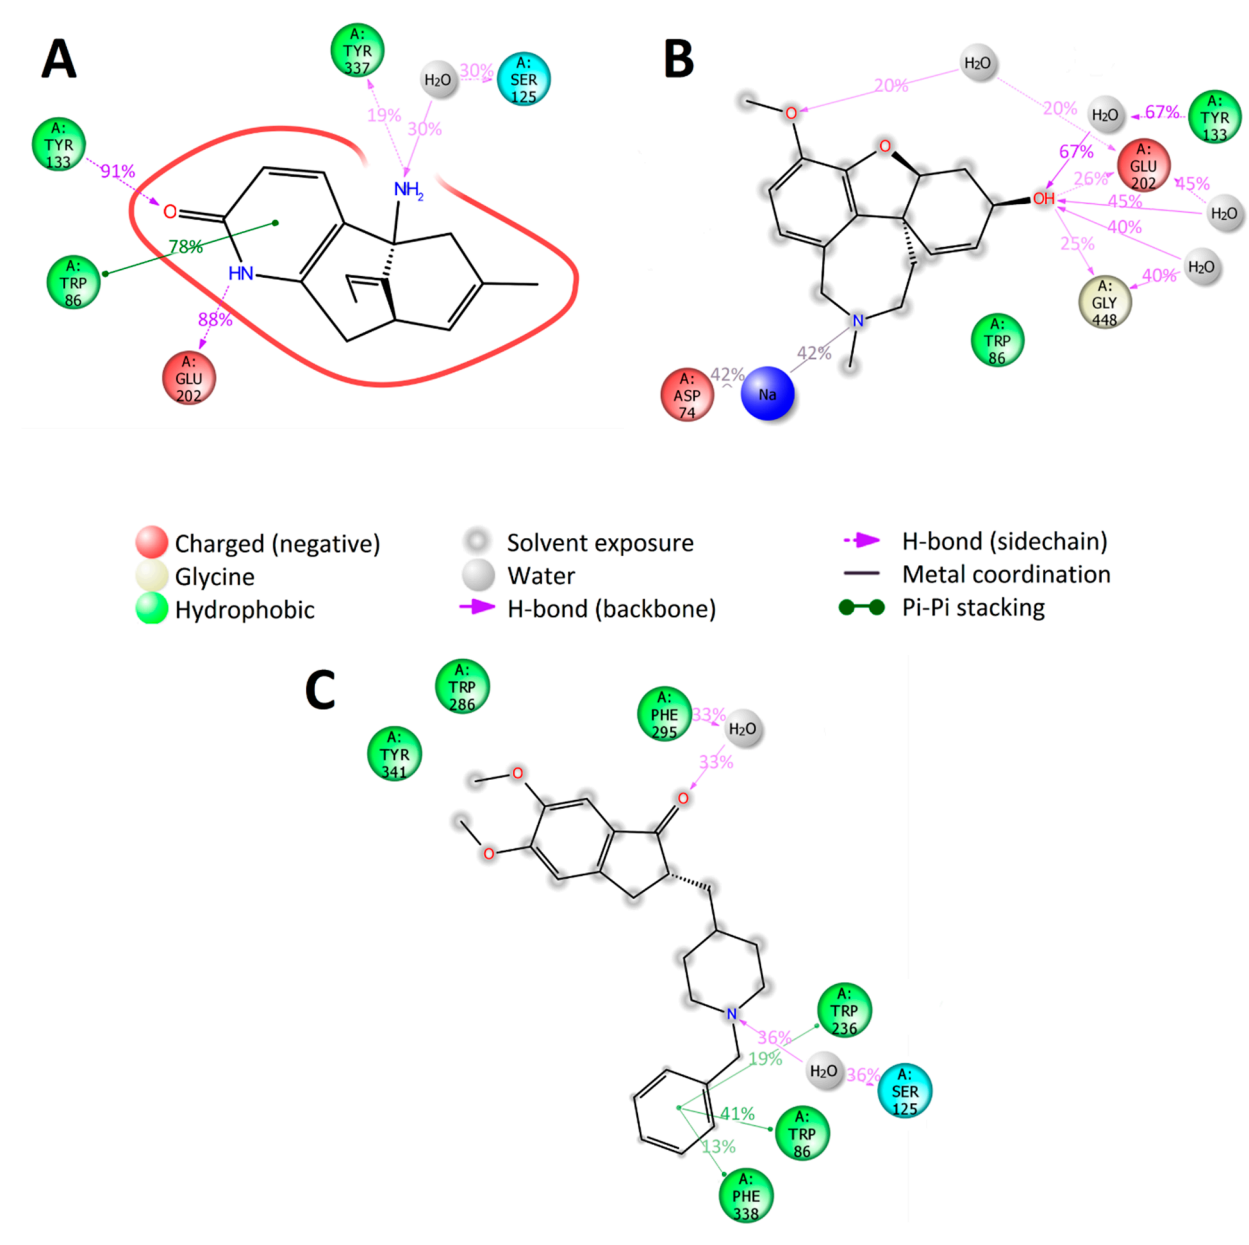

**Figure S1.** 2D summary diagram of molecular dynamics calculated contacts between AChE and inhibitors (A) (-) – huperzine A, (B) (-)-galantamine and (C) donepezil. Interactions that occur more than 10% of the simulation time are shown.

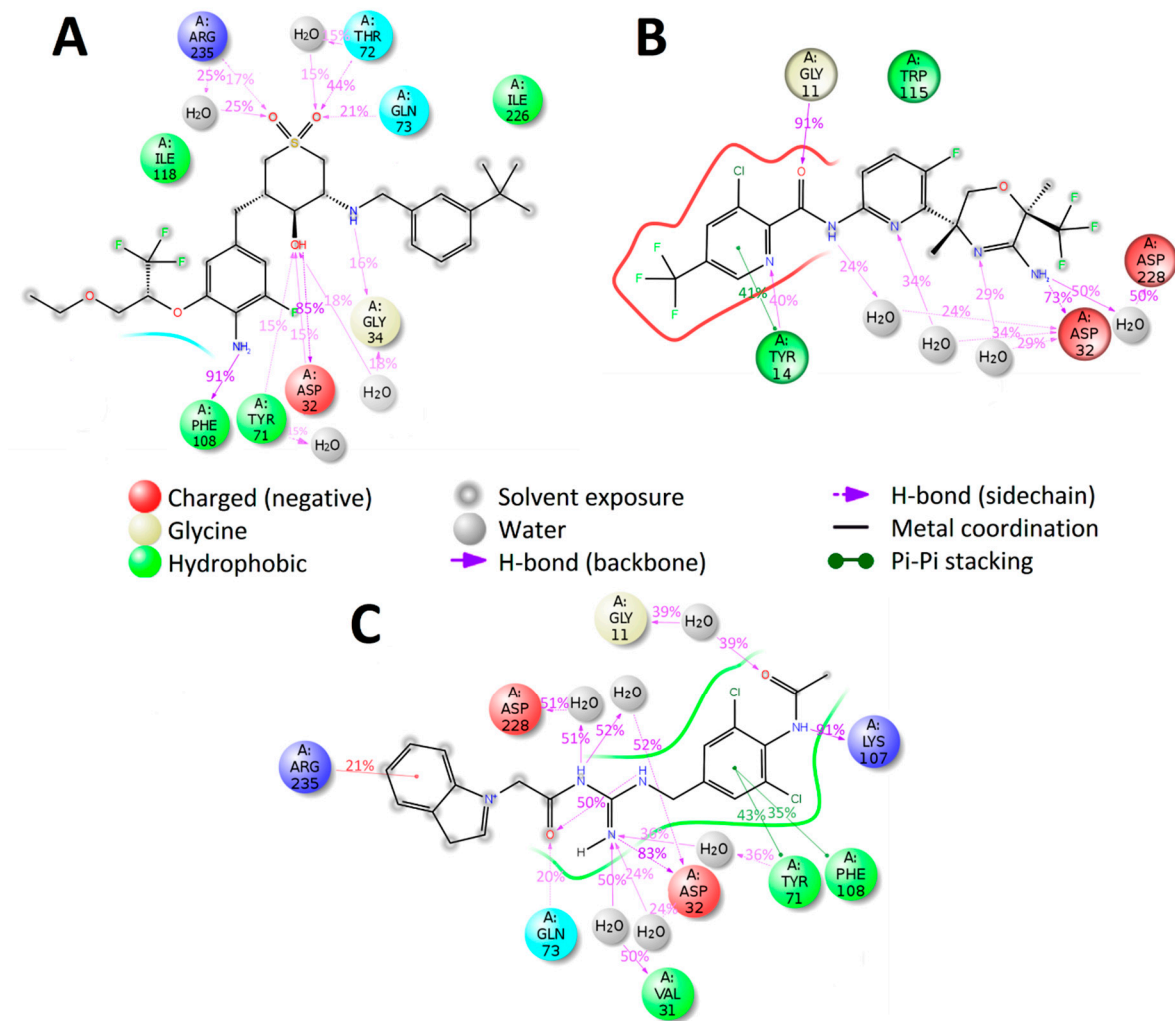

**Figure S2.** 2D summary diagram of molecular dynamics calculated contacts between BACE1 and inhibitors (A) NVP-BXD552, (B) CNP520 and (C) VTI. Interactions that occur more than 10% of the simulation time are shown.

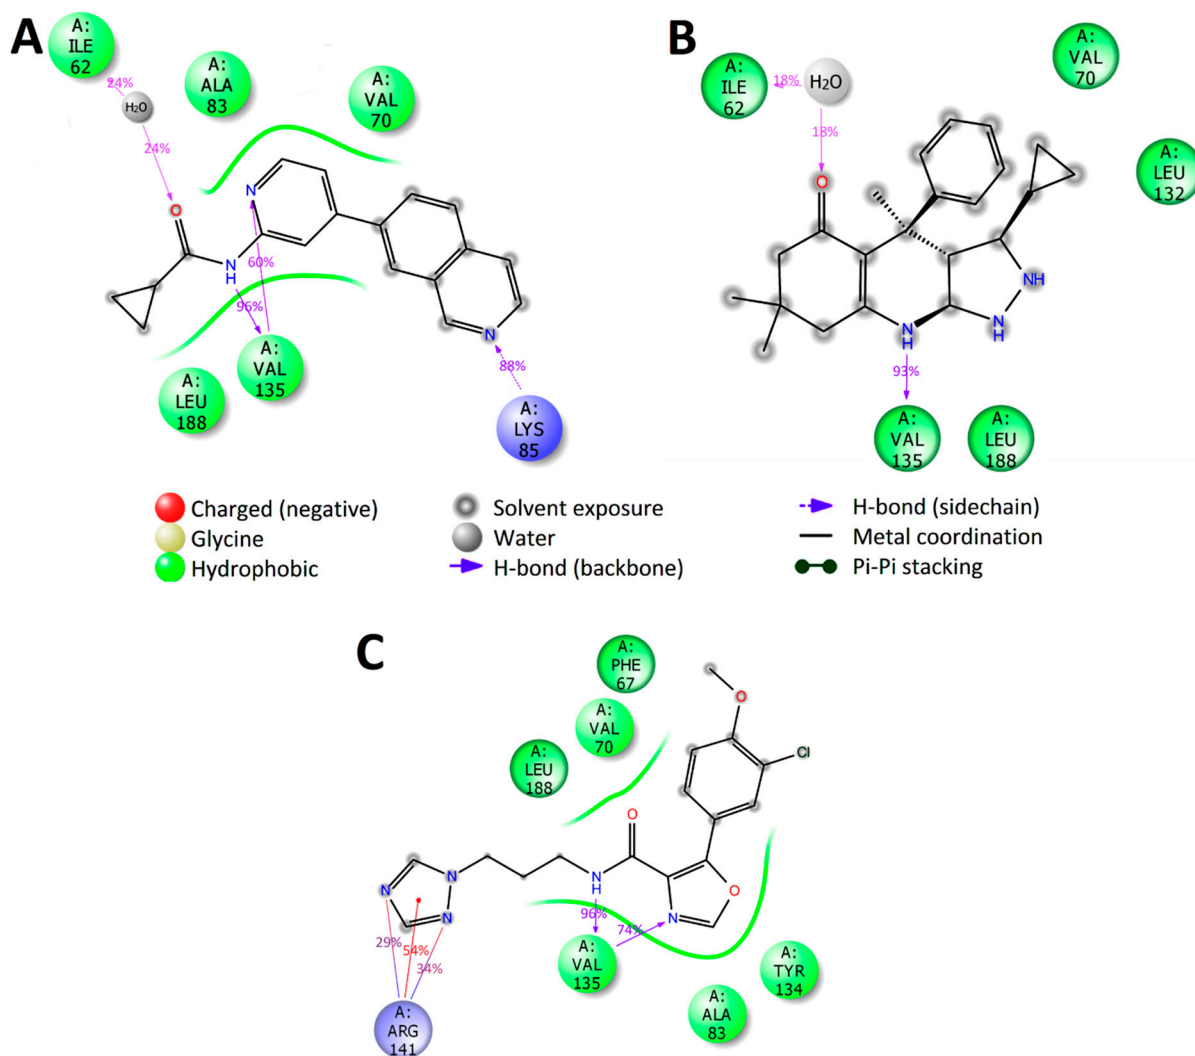

**Figure S3.** 2D summary diagram of molecular dynamics calculated contacts between GSK3 $\beta$  and inhibitors (A) N-[4-(isoquinolin-7-yl)pyridin-2-yl]cyclopropanecarboxamide, (B) BRD0209 and (C) PF-04802367. Interactions that occur more than 10% of the simulation time are shown.

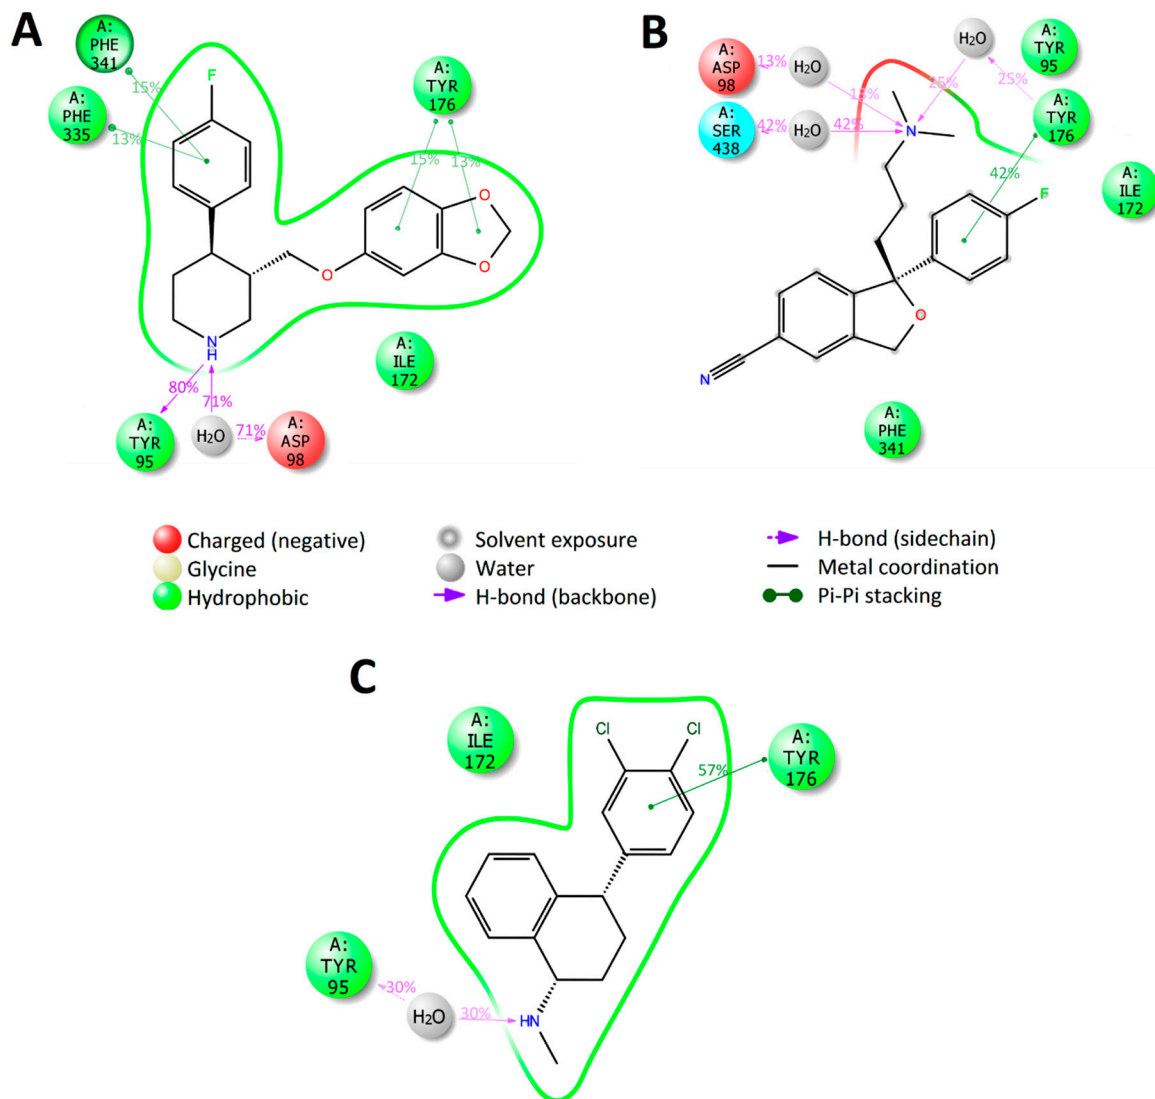

**Figure S4.** 2D summary diagram of molecular dynamics calculated contacts between SERT and inhibitors (A) paroxetine, (B) s-citalopram and (C) sertraline. Interactions that occur more than 10% of the simulation time are shown.



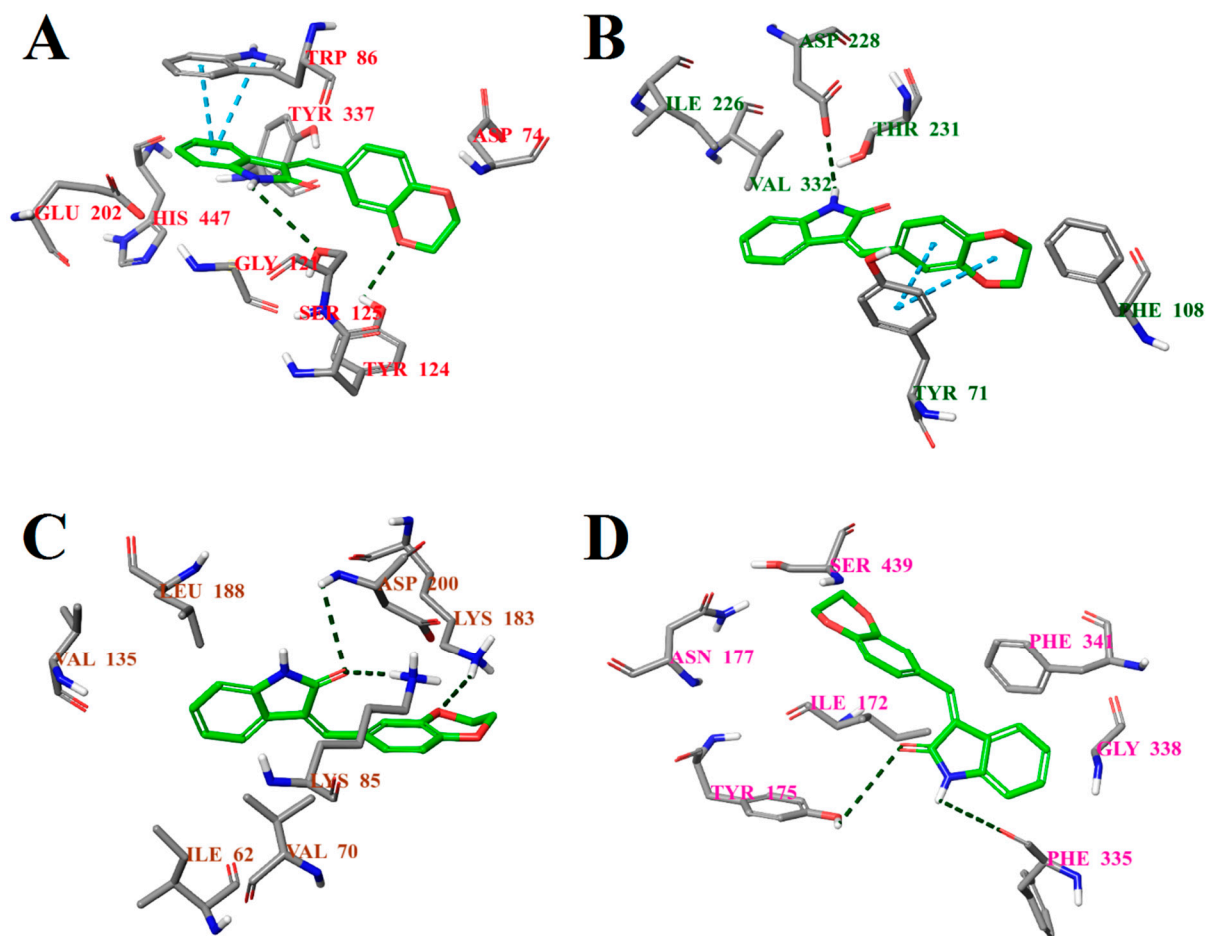

**Figure S5.** Calculated binding modes of compound ZINC1034491 (A) – in the active site of AChE (ID: 4EY6); (B) – in the active site of BACE1 (ID: 6EQM); (C) – in the active site of GSK3 $\beta$  (ID: 1PYX); (D) – in the central active site of SERT (ID: 5I6X). The amino acid residues of target proteins are colored as gray (carbon), blue (nitrogen), red (oxygen), and white (hydrogen). Hydrogen bonds formed between compound and residues of target proteins are represented by green dashed lines, pi-pi stacking is represented by blue dashed line.

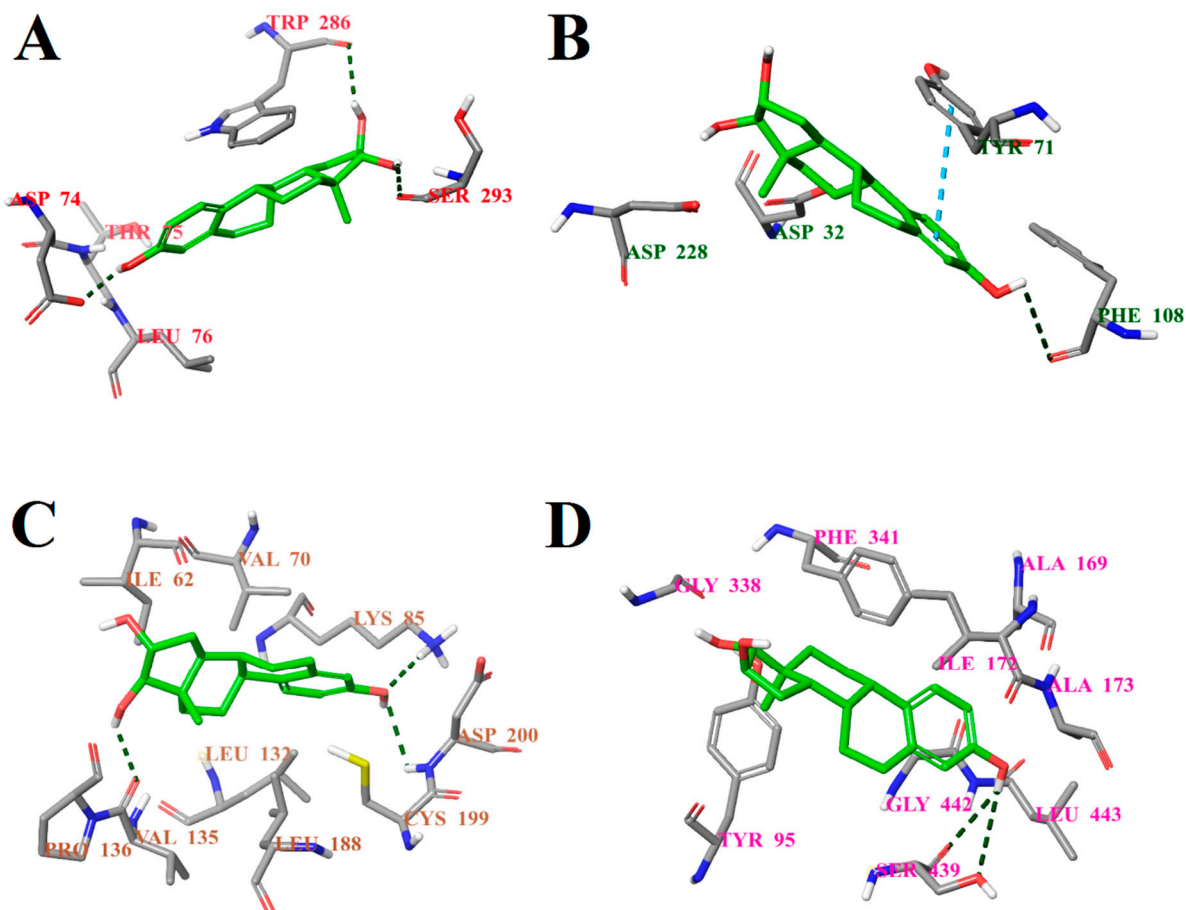

**Figure S6.** Calculated binding modes of compound ZINC3977996 **(A)** – in the active site of AChE (ID: 4EY6); **(B)** – in the active site of BACE1 (ID: 6EQM); **(C)** – in the active site of GSK3 $\beta$  (ID: 1PYX); **(D)** – in the central active site of SERT (ID: 5I6X). The amino acid residues of target proteins are colored as gray (carbon), blue (nitrogen), red (oxygen), and white (hydrogen). Hydrogen bonds formed between compound and residues of target proteins are represented by green dashed lines, pi-pi stacking is represented by blue dashed line.

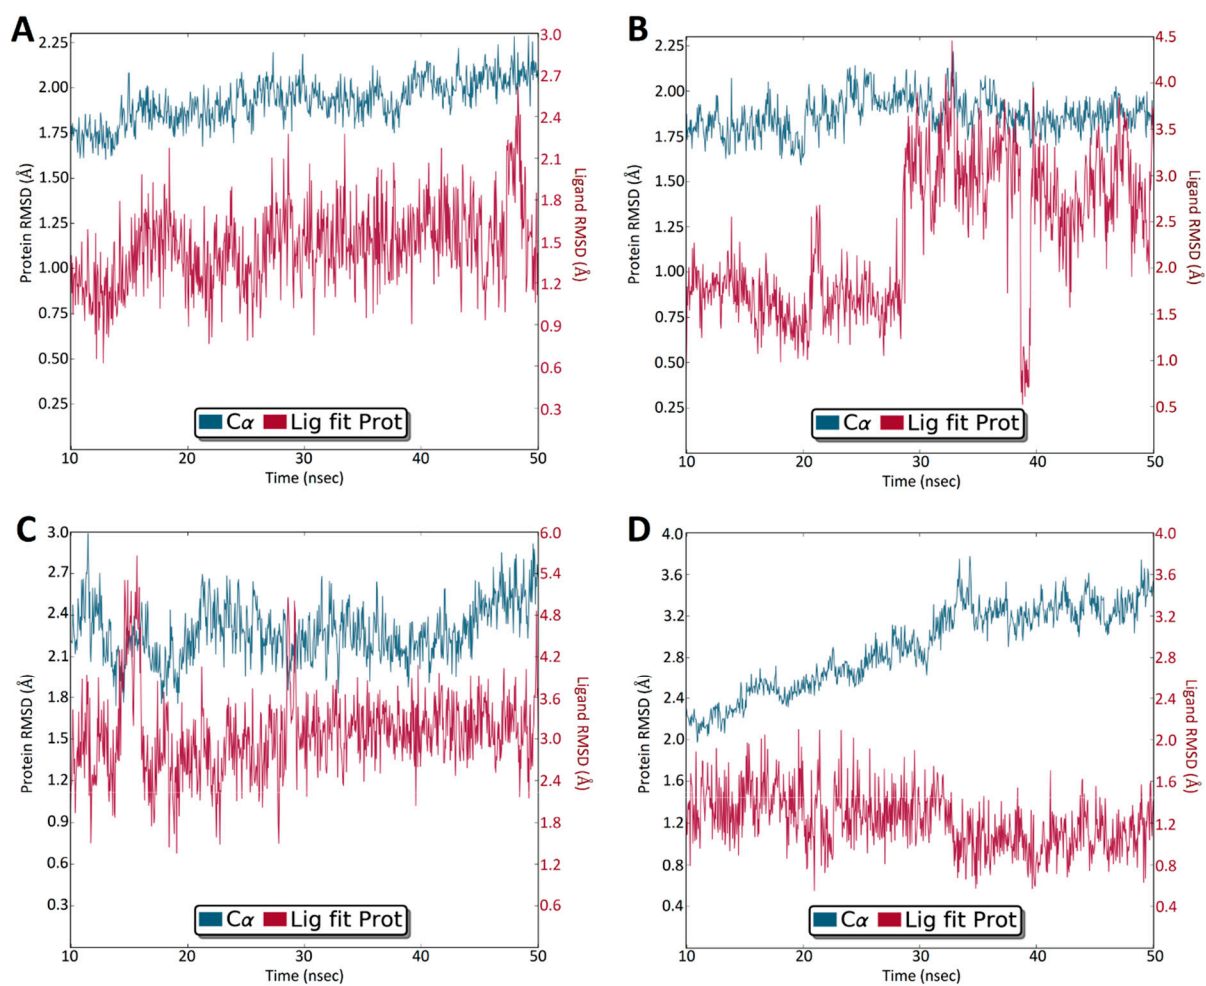

**Figure S7.** RMSD of the atomic positions for the compounds ZINC4027357 (in red) and the target proteins (in blue): (A) – in the active site of AChE (ID: 4EY6); (B) – in the active site of BACE1 (ID: 6EQM); (C) – in the active site of GSK3β (ID: 1PYX); (D) – in the central active site of SERT (ID: 5I6X) of the 50 ns molecular dynamics simulations.

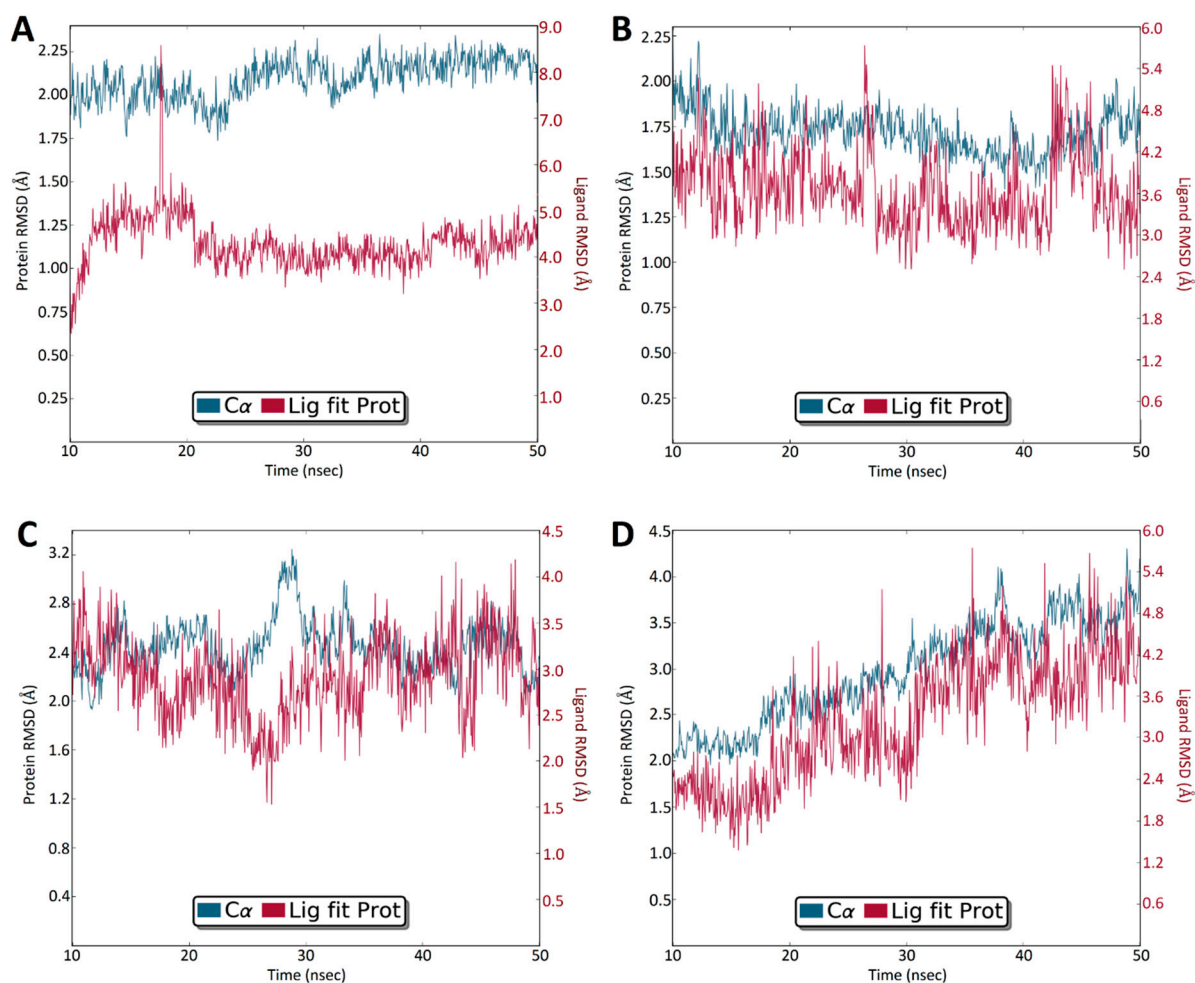

**Figure S8.** RMSD of the atomic positions for the compounds ZINC1034491 (in red) and the target proteins (in blue): **(A)** – in the active site of AChE (ID: 4EY6); **(B)** – in the active site of BACE1 (ID: 6EQM); **(C)** – in the active site of GSK3β (ID: 1PYX); **(D)** – in the central active site of SERT (ID: 5I6X) of the 50 ns molecular dynamics simulations.

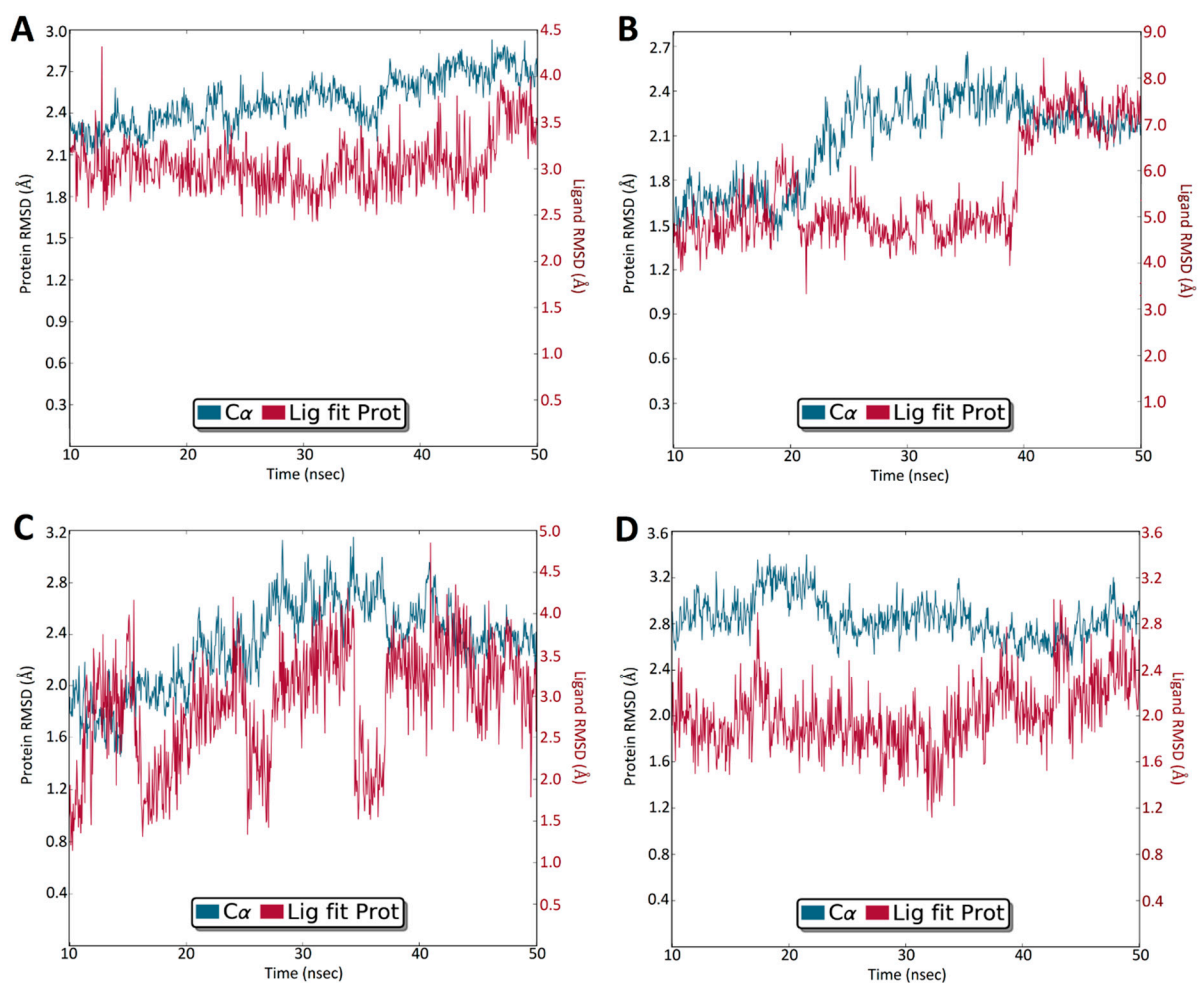

**Figure S9.** RMSD of the atomic positions for the compounds ZINC3977996 (in red) and the target proteins (in blue): (A) – in the active site of AChE (ID: 4EY6); (B) – in the active site of BACE1 (ID: 6EQM); (C) – in the active site of GSK3β (ID: 1PYX); (D) – in the central active site of SERT (ID: 5I6X) of the 50 ns molecular dynamics simulations.

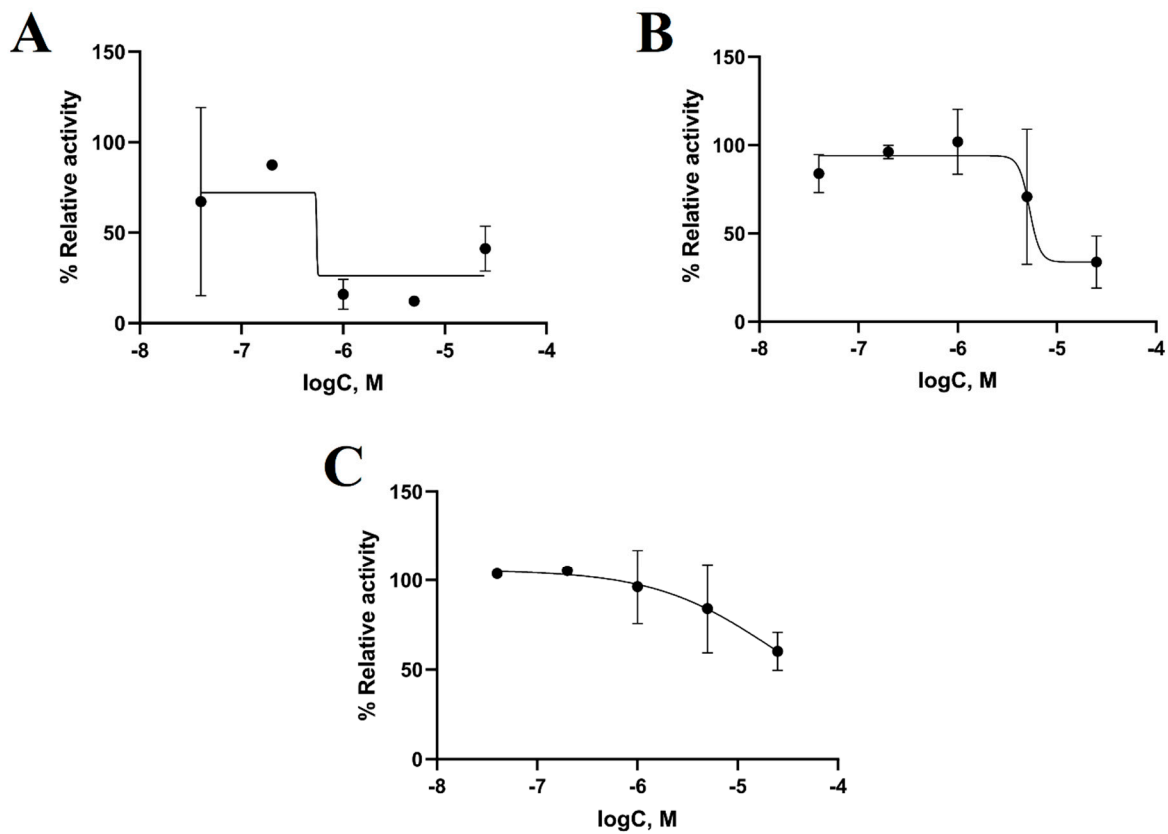

**Figure S10.** Inhibition of (A) AChE and (B) BACE1 by ZINC4027357 ( $IC_{50} = 0.55 \mu\text{M}$  and  $5.2 \mu\text{M}$ , respectively); (C) – Inhibition of AChE by ZINC1801081 ( $IC_{50} = 20.9 \mu\text{M}$ ).
